# Supplementary material for: Air Quality and Traffic Trends in Cincinnati, Ohio during the COVID-19 Pandemic
Source: MDPI journal article supplement (doi:10.3390/atmos13091459), 2022-09-08
Supplement: s1 [file s1]

Supplementary Materials

# Air Quality and Traffic Trends in Cincinnati, Ohio during the COVID-19 Pandemic

Rachel Tumbleson and Simone Balachandran

## Traffic Counts

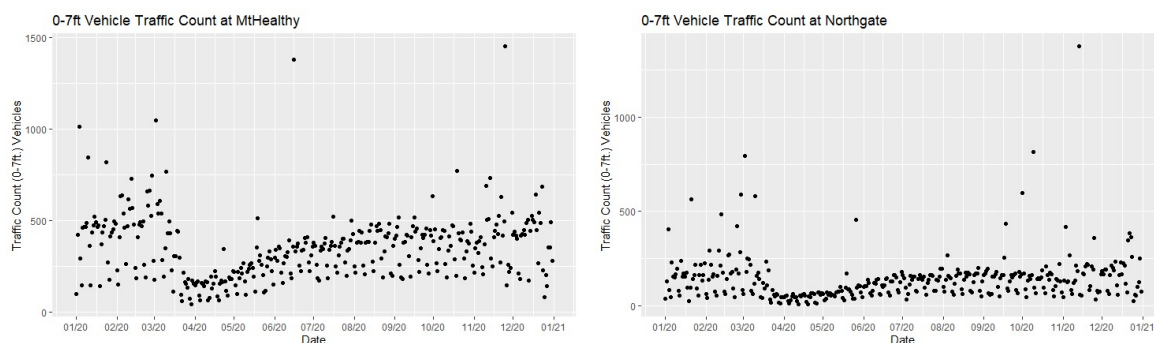

**Figure S1.** Traffic counts of vehicles 0-7 ft in length at the Mt. Healthy and Northgate sites.

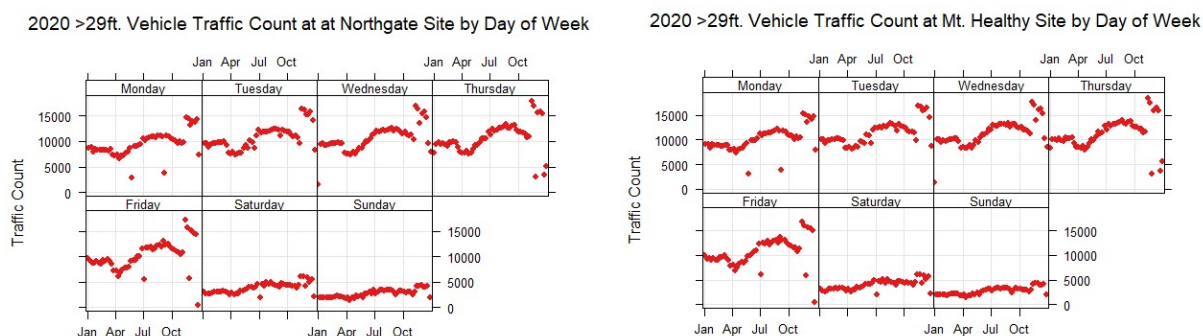

**Figure S2.** Traffic volume counts for vehicles >29 ft by day of the week during 2020.

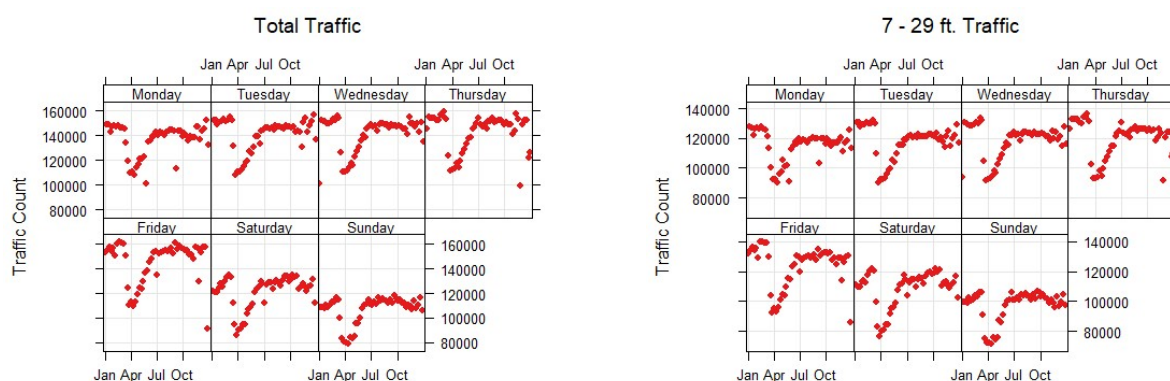

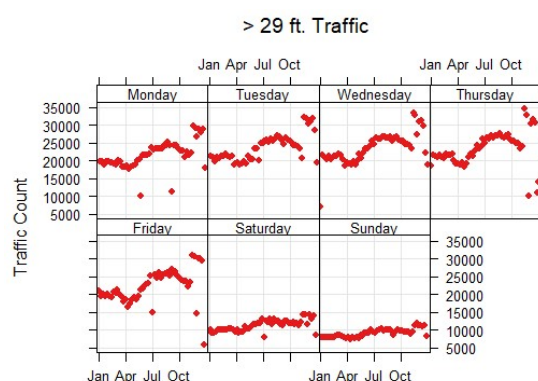

**Figure S3.** Predicted traffic counts for each classification at the Near Road site by day of the week over 2020.

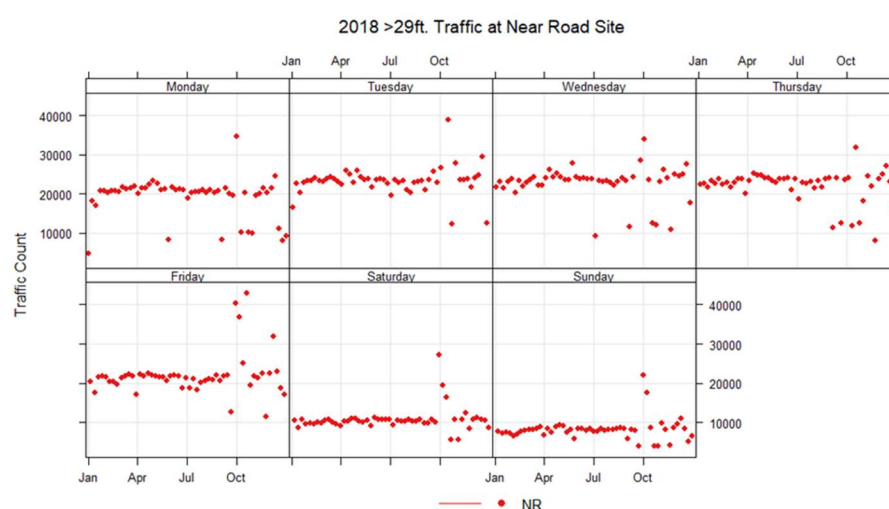

**Figure S4.** Traffic volume counts for vehicles >29 ft by day of the week during 2018.

### Traffic Count Linear Regression Results

**Table S1.** Results of round 2 linear regression for prediction of total traffic counts at Near Road site in 2020. Northgate was used as the sole predictor because, when both Northgate and Mt. Healthy were used as predictors, the Northgate site coefficient was not statistically significant ( $p$ -value = 0.3365) while the Mt. Healthy site was somewhat significant ( $p$ -value = 0.0553).

| Variable    | Coefficient        | Std. Error            | t value | Pr(> t )             |
|-------------|--------------------|-----------------------|---------|----------------------|
| Intercept   | $5.02 \times 10^4$ | $2.12 \times 10^3$    | 25.35   | $<2 \times 10^{-16}$ |
| Mt. Healthy | 1.11               | $2.47 \times 10^{-2}$ | 44.69   | $<2 \times 10^{-16}$ |
| $R^2$       | 0.761              |                       |         |                      |

**Table S2.** Results of round 2 linear regression for prediction of 0–7 ft traffic counts at Near Road site in 2020. The model was built using both Mt. Healthy and Northgate sites as predictors only showed Mt. Healthy site coefficient to be somewhat significant ( $p$ -value = 0.0656), while the Northgate site coefficient was not statistically significant ( $p$ -value = 0.7022).

| Variable    | Coefficient | Std. Error | t value | Pr(> t )             |
|-------------|-------------|------------|---------|----------------------|
| Intercept   | 508.88      | 41.24      | 12.34   | $<2 \times 10^{-16}$ |
| Mt. Healthy | 0.09        | 0.04       | 2.17    | 0.03                 |
| $R^2$       | 0.01        |            |         |                      |

**Table S3.** Results of round 2 linear regression for prediction of 7–29 ft traffic counts at Near Road site in 2020. The model was built using both Mt. Healthy and Northgate sites as predictors only showed the Northgate site coefficient to be somewhat significant ( $p$ -value =  $1.2 \times 10^{-7}$ ), while the Mt. Healthy site coefficient was not statistically significant ( $p$ -value = 0.0866).

| Variable  | Coefficient        | Std. Error            | t value | Pr(> t )             |
|-----------|--------------------|-----------------------|---------|----------------------|
| Intercept | $4.97 \times 10^4$ | $2.14 \times 10^3$    | 23.18   | $<2 \times 10^{-16}$ |
| Northgate | 1.13               | $3.06 \times 10^{-2}$ | 36.89   | $<2 \times 10^{-16}$ |
| $R^2$     | 0.69               |                       |         |                      |

**Table S4.** Results of round 1 linear regression for prediction of total counts >29 ft at Near Road site in 2020.

| Variable    | Coefficient | Std. Error | t value | Pr(> t )                |
|-------------|-------------|------------|---------|-------------------------|
| Intercept   | 4939.44     | 373.48     | 13.23   | $<2 \times 10^{-16}$    |
| Northgate   | −1.21       | 0.60       | −2.02   | 0.044                   |
| Mt. Healthy | 2.78        | 0.58       | 4.80    | $<2.01 \times 10^{-16}$ |
| $R^2$       | 0.72        |            |         |                         |

### Predicted Traffic Trends at the Near Road site

**Table S5.** Predicted daily traffic counts at the Near Road site for each classification type (total traffic count, 0–7 ft, 7–29 ft, and >29 ft). Percentages shown indicate percent changes in traffic counts for each classification compared to respective classification type from pre × 10–pandemic 2020 (January 1–March 22).

|                 |              | 2020 Daily Average Traffic Count |                      |                      |                      |                     |                     |
|-----------------|--------------|----------------------------------|----------------------|----------------------|----------------------|---------------------|---------------------|
|                 | Jan 1–Mar 22 | Mar 23–April 10                  | Mar 23–May 1         | Mar 23–May 20        | Mar 23–June 30       | May 20–June 30      | July 1–Dec 11       |
| Total Traffic   | 139,481      | 105,741<br>(−24.19%)             | 106,824<br>(−23.41%) | 109,610<br>(−21.42%) | 119,061<br>(−14.64%) | 132,833<br>(−4.77%) | 139,607<br>(0.09%)  |
| 7–29 ft Traffic | 121,331      | 89,292<br>(−26.41%)              | 90,556<br>(−25.36%)  | 93,175<br>(−23.21%)  | 101,506<br>(−16.34%) | 113,586<br>(−6.38%) | 118,600<br>(−2.25%) |
| >29 ft Traffic  | 17,029       | 16,605<br>(−2.49%)               | 16,218<br>(−4.76%)   | 16,273<br>(−4.44%)   | 17,407<br>(2.22%)    | 19,103 (12.18%)     | 21,619<br>(26.95%)  |

## Air Quality Summary Statistics

**Table S6.** Mean and standard deviation of pollutant concentration measured at the Near Road and Taft sites during each time period of interest from 2016 through 2020. The first number in each cell represents the mean, while the number in parentheses represents the standard deviation.

| Time Period               | Year | Near Road                          |                                                   |                  |                          | Taft                               |                                                   |                  |                          |                         |
|---------------------------|------|------------------------------------|---------------------------------------------------|------------------|--------------------------|------------------------------------|---------------------------------------------------|------------------|--------------------------|-------------------------|
|                           |      | BC<br>( $\mu\text{g}/\text{m}^3$ ) | PM <sub>2.5</sub><br>( $\mu\text{g}/\text{m}^3$ ) | CO<br>(ppm)      | NO <sub>x</sub><br>(ppb) | BC<br>( $\mu\text{g}/\text{m}^3$ ) | PM <sub>2.5</sub><br>( $\mu\text{g}/\text{m}^3$ ) | CO<br>(ppm)      | NO <sub>2</sub><br>(ppb) | O <sub>3</sub><br>(ppb) |
| Jan 1–<br>Mar 22          | 2016 | 1.653<br>(1.515)                   | NA                                                | 0.325<br>(0.224) | 58.695<br>(57.237)       | NA                                 | 7.674<br>(4.493)                                  | 0.261<br>(0.102) | 10.087<br>(6.08)         | 23.867<br>(10.517)      |
|                           | 2017 | 1.334<br>(1.289)                   | 10.175<br>(6.203)                                 | 0.338<br>(0.197) | 47.626<br>(45.444)       | NA                                 | 6.972 (5.28)                                      | 0.16 (0.111)     | 7.516<br>(6.684)         | 25.119<br>(11.189)      |
|                           | 2018 | 1.07 (0.992)                       | 9.186<br>(5.066)                                  | 0.315 (0.2)      | 44.853<br>(45.372)       | NA                                 | 9.611<br>(5.943)                                  | 0.209<br>(0.116) | 10.473<br>(6.256)        | 26.417<br>(10.453)      |
|                           | 2019 | 1.093<br>(1.074)                   | 12.342<br>(7.232)                                 | 0.395<br>(0.231) | 46.792<br>(46.929)       | 0.404<br>(0.287)                   | 10.052<br>(5.77)                                  | 0.204<br>(0.085) | 10.639<br>(6.966)        | 24.917<br>(11.4)        |
|                           | 2020 | 1.059<br>(0.988)                   | 10.218<br>(7.597)                                 | 0.31 (0.201)     | 48.096<br>(47.157)       | 0.43 (0.318)                       | 8.16 (4.585)                                      | 0.189 (0.11)     | 9.624<br>(6.025)         | 20.418<br>(11.674)      |
| Mar<br>23–<br>April<br>10 | 2016 | 1.173<br>(1.013)                   | NA                                                | 0.27 (0.155)     | 35.035<br>(33.488)       | NA                                 | 5.838<br>(3.536)                                  | 0.2 (0.078)      | 6.601 (3.74)             | 32.897<br>(11.354)      |
|                           | 2017 | 1.327 (1.14)                       | 9.409<br>(5.578)                                  | 0.315 (0.15)     | 39.956<br>(32.986)       | NA                                 | 6.327<br>(3.878)                                  | 0.121<br>(0.116) | 4.617<br>(3.965)         | 37.022<br>(10.118)      |
|                           | 2018 | 1.129<br>(1.059)                   | 8.675<br>(4.337)                                  | 0.349<br>(0.161) | 50.23<br>(41.842)        | NA                                 | 7.543<br>(4.693)                                  | 0.152<br>(0.137) | 10.02<br>(6.536)         | 32.237<br>(13.95)       |
|                           | 2019 | 1.682<br>(1.145)                   | 12.831<br>(7.593)                                 | 0.442<br>(0.224) | 53.55<br>(41.793)        | 0.543<br>(0.409)                   | 9.963<br>(6.036)                                  | 0.184<br>(0.093) | 11.921<br>(8.097)        | 34.914<br>(12.543)      |
|                           | 2020 | 1.19 (1.091)                       | 11.821<br>(9.82)                                  | 0.31 (0.186)     | 40.456<br>(40.528)       | 0.468<br>(0.444)                   | 10.079<br>(6.05)                                  | 0.202<br>(0.077) | 6.603 (5.35)             | 30.98<br>(11.521)       |
| Mar<br>23–<br>May 1       | 2016 | 1.889<br>(1.598)                   | NA                                                | 0.351 (0.2)      | 48.816<br>(41.758)       | NA                                 | 7.506<br>(4.522)                                  | 0.237<br>(0.113) | 7.854<br>(6.522)         | 34.346<br>(13.804)      |
|                           | 2017 | 1.473<br>(1.263)                   | 10.461<br>(6.813)                                 | 0.336<br>(0.178) | 41.639<br>(34.051)       | NA                                 | 7.048 (4.01)                                      | 0.165<br>(0.104) | 5.081<br>(5.309)         | 36.646<br>(11.136)      |
|                           | 2018 | 1.165<br>(1.104)                   | 9.493<br>(5.368)                                  | 0.35 (0.178)     | 27.258<br>(39.254)       | NA                                 | 7.867<br>(4.517)                                  | 0.172<br>(0.125) | 9.459<br>(6.972)         | 36.093<br>(13.6)        |
|                           | 2019 | 1.409<br>(1.232)                   | 11.47<br>(7.618)                                  | 0.375<br>(0.206) | 37.74<br>(39.676)        | 0.456<br>(0.394)                   | 8.917<br>(5.443)                                  | 0.169<br>(0.076) | 9.472<br>(6.858)         | 35.959<br>(11.824)      |
|                           | 2020 | 0.996<br>(0.951)                   | 10.189<br>(8.699)                                 | 0.283<br>(0.175) | 34.33<br>(36.56)         | 0.339<br>(0.396)                   | 8.931<br>(5.548)                                  | 0.196<br>(0.078) | 6.72 (5.307)             | 32.779<br>(11.039)      |
| Mar<br>23–<br>May<br>20   | 2016 | 2.062<br>(1.574)                   | NA                                                | 0.353<br>(0.189) | 51.876<br>(38.943)       | NA                                 | 7.155<br>(4.782)                                  | 0.235 (0.1)      | 8.044<br>(6.177)         | 33.518<br>(13.162)      |
|                           | 2017 | 1.546<br>(1.222)                   | 10.711<br>(6.433)                                 | 0.342<br>(0.166) | 42.458<br>(33.682)       | NA                                 | 7.457<br>(4.313)                                  | 0.178<br>(0.095) | 4.993<br>(5.161)         | 37.062<br>(12.074)      |
|                           | 2018 | 1.267 (1.08)                       | 12.306<br>(6.726)                                 | 0.346<br>(0.173) | 30.626<br>(37.817)       | NA                                 | 9.857<br>(5.738)                                  | 0.189<br>(0.114) | 9.237<br>(6.597)         | 36.623<br>(13.856)      |
|                           | 2019 | 0.955<br>(1.209)                   | 11.359<br>(7.404)                                 | 0.33 (0.214)     | 37.25<br>(39.365)        | 0.472<br>(0.402)                   | 9.346<br>(5.494)                                  | 0.167 (0.08)     | 9.182<br>(6.762)         | 34.578<br>(13.032)      |
|                           | 2020 | 0.982<br>(0.895)                   | 9.899<br>(8.471)                                  | 0.287 (0.17)     | 32.131<br>(34.844)       | 0.389<br>(0.412)                   | 8.489<br>(5.312)                                  | 0.192<br>(0.079) | 6.626<br>(5.365)         | 32.463<br>(11.267)      |
| May<br>20–                | 2016 | 2.887 (1.89)                       | NA                                                | 0.364<br>(0.176) | 52.053<br>(34.279)       | NA                                 | 8.914<br>(5.467)                                  | 0.235<br>(0.105) | 9.095<br>(6.857)         | 41.506<br>(17.403)      |

|                 |             |               |                |               |                 |               |                |               |               |                 |
|-----------------|-------------|---------------|----------------|---------------|-----------------|---------------|----------------|---------------|---------------|-----------------|
| June 30         | 2017        | 1.48 (1.072)  | 10.354 (4.891) | 0.328 (0.144) | 42.176 (32.446) | NA            | 8.279 (4.667)  | 0.181 (0.081) | 5.116 (6.845) | 37.731 (15.886) |
|                 | 2018        | 1.241 (1.104) | 12.608 (5.702) | 0.339 (0.185) | 16.998 (26.706) | NA            | 10.75 (5.066)  | 0.179 (0.087) | 8.22 (5.235)  | 36.877 (17.253) |
|                 | 2019        | 0.937 (1.017) | 11.02 (5.058)  | 0.306 (0.151) | 32.686 (28.302) | 0.489 (0.327) | 9.825 (5.514)  | 0.14 (0.068)  | 8.166 (5.471) | 32.741 (16.091) |
|                 | 2020        | 1.135 (0.824) | 10.399 (8.023) | 0.296 (0.147) | 19.214 (25.742) | 0.577 (0.504) | 9.426 (5.575)  | 0.174 (0.073) | 6.306 (4.886) | 34.65 (15.119)  |
| Mar 23– June 30 | 2016        | 2.394 (1.76)  | NA             | 0.382 (0.185) | 51.664 (37.015) | NA            | 7.867 (5.162)  | 0.235 (0.102) | 8.483 (6.515) | 36.848 (15.639) |
|                 | 2017        | 1.522 (1.166) | 9.906 (5.855)  | 0.308 (0.158) | 42.448 (33.295) | NA            | 7.773 (4.469)  | 0.179 (0.09)  | 5.076 (5.936) | 37.471 (13.746) |
|                 | 2018        | 1.254 (1.093) | 12.985 (6.287) | 0.332 (0.179) | 24.795 (34.343) | NA            | 10.195 (5.489) | 0.185 (0.104) | 8.838 (6.109) | 36.674 (15.346) |
|                 | 2019        | 0.957 (1.135) | 10.508 (6.488) | 0.268 (0.192) | 35.462 (35.387) | 0.482 (0.373) | 9.588 (5.513)  | 0.156 (0.076) | 8.791 (6.295) | 33.849 (14.455) |
|                 | 2020        | 1.05 (0.872)  | 10.165 (8.306) | 0.307 (0.162) | 27.028 (32.062) | 0.47 (0.463)  | 8.931 (5.44)   | 0.185 (0.077) | 6.533 (5.192) | 33.393 (13.111) |
| July 1– Dec 11  | 2016        | 2.97 (2.345)  | NA             | 0.432 (0.251) | 56.57 (46.504)  | NA            | 8.967 (6.745)  | 0.184 (0.161) | 9.521 (6.766) | 26.176 (15.376) |
|                 | 2017        | 1.872 (1.419) | 12.728 (6.985) | 0.38 (0.255)  | 56.973 (47.425) | NA            | 6.404 (7.138)  | 0.217 (0.155) | 8.962 (7.142) | 27.164 (15.756) |
|                 | 2018        | 1.487 (1.209) | 13.553 (7.522) | 0.401 (0.217) | 47.079 (38.139) | NA            | 10.905 (6.637) | 0.159 (0.099) | 9.071 (5.7)   | 24.05 (14.879)  |
|                 | 2019        | 1.488 (1.183) | 12.112 (7.214) | 0.378 (0.216) | 42.823 (39.038) | 0.58 (0.424)  | 10.536 (5.876) | 0.183 (0.109) | 9.853 (6.878) | 28.718 (16.545) |
|                 | 2020        | 1.655 (1.26)  | 11.615 (8.662) | 0.424 (0.253) | 50.461 (42.371) | 0.665 (0.734) | 9.322 (6.531)  | 0.223 (0.159) | 8.931 (6.452) | 25.519 (15.128) |
| Year Averages   |             |               |                |               |                 |               |                |               |               |                 |
| 2016            | 2.15 (2.06) | NA            | 0.35 (0.23)    | 50.67 (47.79) | NA              | 7.7 (5.86)    | 0.23 (0.14)    | 8.53 (6.57)   | 32.74 (15.34) |                 |
| 2017            | 1.51 (1.33) | 10.53 (6.54)  | 0.34 (0.22)    | 44.75 (43.71) | NA              | 7.18 (6.19)   | 0.17 (0.13)    | 5.91 (6.9)    | 34.03 (14.95) |                 |
| 2018            | 1.23 (1.17) | 11.26 (6.86)  | 0.35 (0.25)    | 34.55 (42.41) | NA              | 9.53 (6.12)   | 0.18 (0.11)    | 9.33 (6.09)   | 32.71 (15.1)  |                 |
| 2019            | 1.22 (1.19) | 11.66 (7.26)  | 0.36 (0.24)    | 40.9 (43.81)  | 0.49 (0.41)     | 9.75 (5.85)   | 0.17 (0.11)    | 9.72 (6.96)   | 32.24 (15.31) |                 |
| 2020            | 1.15 (1.12) | 10.62 (8.35)  | 0.32 (0.23)    | 35.96 (42.12) | 0.48 (0.59)     | 9.05 (5.82)   | 0.19 (0.13)    | 7.33 (6.07)   | 30.03 (14.49) |                 |

**Table S7.** Median pollutant concentration measured at the Near Road and Taft site during each time period of interest from 2016 through 2020.

| Time Period  | Year | Near Road               |                                        |          |                       | Taft                    |                                        |          |                       |                      |
|--------------|------|-------------------------|----------------------------------------|----------|-----------------------|-------------------------|----------------------------------------|----------|-----------------------|----------------------|
|              |      | BC (µg/m <sup>3</sup> ) | PM <sub>2.5</sub> (µg/m <sup>3</sup> ) | CO (ppm) | NO <sub>x</sub> (ppb) | BC (µg/m <sup>3</sup> ) | PM <sub>2.5</sub> (µg/m <sup>3</sup> ) | CO (ppm) | NO <sub>2</sub> (ppb) | O <sub>3</sub> (ppb) |
| Jan 1–Mar 22 | 2016 | 1.10                    | NA                                     | 0.27     | 39.00                 | NA                      | 6.60                                   | 0.24     | 8.00                  | 24.00                |
|              | 2017 | 0.88                    | 9.05                                   | 0.28     | 33.00                 | NA                      | 6.00                                   | 0.16     | 6.00                  | 26.00                |
|              | 2018 | 0.73                    | 8.20                                   | 0.26     | 31.00                 | NA                      | 8.40                                   | 0.22     | 9.00                  | 27.00                |
|              | 2019 | 0.73                    | 11.30                                  | 0.34     | 31.00                 | 0.33                    | 9.10                                   | 0.19     | 8.80                  | 26.00                |
|              | 2020 | 0.72                    | 8.60                                   | 0.24     | 32.00                 | 0.35                    | 7.10                                   | 0.18     | 7.80                  | 22.00                |

|                 |      |      |       |      |       |      |       |      |      |       |
|-----------------|------|------|-------|------|-------|------|-------|------|------|-------|
| Mar 23–April 10 | 2016 | 0.85 | NA    | 0.22 | 25.50 | NA   | 5.25  | 0.21 | 6.00 | 35.00 |
|                 | 2017 | 0.98 | 8.05  | 0.27 | 31.00 | NA   | 5.50  | 0.16 | 4.00 | 37.00 |
|                 | 2018 | 0.72 | 8.00  | 0.32 | 38.00 | NA   | 7.20  | 0.19 | 8.00 | 36.00 |
|                 | 2019 | 1.55 | 11.60 | 0.37 | 45.00 | 0.46 | 8.80  | 0.16 | 9.90 | 36.50 |
|                 | 2020 | 0.87 | 8.80  | 0.27 | 28.50 | 0.34 | 9.30  | 0.19 | 4.80 | 31.00 |
| Mar 23–May 1    | 2016 | 1.42 | NA    | 0.30 | 38.00 | NA   | 6.80  | 0.22 | 6.00 | 35.00 |
|                 | 2017 | 1.12 | 8.50  | 0.29 | 32.00 | NA   | 6.20  | 0.18 | 4.00 | 37.00 |
|                 | 2018 | 0.76 | 8.10  | 0.31 | 8.00  | NA   | 7.20  | 0.19 | 7.00 | 38.00 |
|                 | 2019 | 1.12 | 10.05 | 0.31 | 28.00 | 0.36 | 7.80  | 0.15 | 7.20 | 37.00 |
|                 | 2020 | 0.67 | 7.40  | 0.22 | 21.50 | 0.25 | 8.10  | 0.18 | 5.10 | 33.00 |
| Mar 23–May 20   | 2016 | 1.66 | NA    | 0.32 | 44.00 | NA   | 6.40  | 0.22 | 6.00 | 33.00 |
|                 | 2017 | 1.24 | 9.30  | 0.31 | 35.00 | NA   | 6.80  | 0.19 | 4.00 | 37.00 |
|                 | 2018 | 0.91 | 10.50 | 0.31 | 14.00 | NA   | 8.80  | 0.20 | 7.00 | 38.00 |
|                 | 2019 | 0.54 | 9.80  | 0.28 | 26.50 | 0.37 | 8.20  | 0.15 | 6.90 | 35.00 |
|                 | 2020 | 0.70 | 7.30  | 0.24 | 20.00 | 0.28 | 7.60  | 0.18 | 4.80 | 33.00 |
| May 20–June 30  | 2016 | 2.52 | NA    | 0.33 | 48.00 | NA   | 8.90  | 0.23 | 7.00 | 41.00 |
|                 | 2017 | 1.25 | 9.10  | 0.30 | 38.00 | NA   | 7.30  | 0.17 | 3.00 | 37.00 |
|                 | 2018 | 0.98 | 11.40 | 0.31 | 0.00  | NA   | 9.90  | 0.16 | 7.00 | 36.00 |
|                 | 2019 | 0.68 | 9.80  | 0.26 | 23.50 | 0.42 | 8.55  | 0.13 | 6.80 | 33.50 |
|                 | 2020 | 0.87 | 8.40  | 0.26 | 8.50  | 0.47 | 7.90  | 0.17 | 4.70 | 34.00 |
| Mar 23–June 30  | 2016 | 2.02 | NA    | 0.36 | 45.50 | NA   | 7.00  | 0.22 | 6.00 | 36.00 |
|                 | 2017 | 1.24 | 9.00  | 0.29 | 36.00 | NA   | 7.00  | 0.18 | 3.00 | 37.00 |
|                 | 2018 | 0.93 | 12.10 | 0.29 | 8.00  | NA   | 9.20  | 0.19 | 7.00 | 37.00 |
|                 | 2019 | 0.61 | 9.55  | 0.23 | 25.00 | 0.40 | 8.40  | 0.14 | 6.90 | 34.00 |
|                 | 2020 | 0.78 | 8.40  | 0.28 | 15.50 | 0.36 | 7.80  | 0.17 | 4.80 | 33.00 |
| June 30–Dec 11  | 2016 | 2.41 | NA    | 0.38 | 45.00 | NA   | 7.60  | 0.17 | 8.00 | 24.00 |
|                 | 2017 | 1.56 | 11.80 | 0.35 | 46.00 | NA   | 5.00  | 0.20 | 7.00 | 25.00 |
|                 | 2018 | 1.18 | 12.60 | 0.36 | 40.00 | 0.43 | 10.00 | 0.14 | 8.00 | 22.00 |
|                 | 2019 | 1.17 | 11.30 | 0.32 | 32.00 | 0.46 | 9.70  | 0.16 | 7.80 | 26.00 |
|                 | 2020 | 1.32 | 10.20 | 0.36 | 40.00 | 0.51 | 8.70  | 0.23 | 7.00 | 24.00 |

**Table S8.** Range of pollutant concentration measured at the Near Road and Taft site during each time period of interest from 2016 through 2020.

| Time Period     | Year | Near Road                          |                                                   |             |                          | Taft                               |                                                   |             |                          |                         |
|-----------------|------|------------------------------------|---------------------------------------------------|-------------|--------------------------|------------------------------------|---------------------------------------------------|-------------|--------------------------|-------------------------|
|                 |      | BC<br>( $\mu\text{g}/\text{m}^3$ ) | PM <sub>2.5</sub><br>( $\mu\text{g}/\text{m}^3$ ) | CO<br>(ppm) | NO <sub>x</sub><br>(ppb) | BC<br>( $\mu\text{g}/\text{m}^3$ ) | PM <sub>2.5</sub><br>( $\mu\text{g}/\text{m}^3$ ) | CO<br>(ppm) | NO <sub>2</sub><br>(ppb) | O <sub>3</sub><br>(ppb) |
| Jan 1–Mar 22    | 2016 | 0–13.05                            | NA                                                | 0–1.77      | 0–529                    | NA                                 | 0–36                                              | 0–1.12      | 1–36                     | 0–55                    |
|                 | 2017 | 0–8.59                             | 1–39.5                                            | 0–1.37      | 0–299                    | NA                                 | 0–33.6                                            | 0–0.8       | 0–41                     | 0–56                    |
|                 | 2018 | 0–7.3                              | 1–50.4                                            | 0–1.5       | 0–267                    | NA                                 | 0–56.2                                            | 0–1.05      | 2–46                     | 0–53                    |
|                 | 2019 | 0–7.57                             | 0.5–42.9                                          | 0–1.7       | 0–304                    | 0–3.12                             | 0–35.3                                            | 0–1.12      | 2–48.2                   | 0–55                    |
|                 | 2020 | 0–6.69                             | 0–58.5                                            | 0–1.26      | 0–262                    | 0–4.29                             | 0–31.8                                            | 0–1.33      | 1.8–40.1                 | 0–51                    |
| Mar 23–April 10 | 2016 | 0.117–6.86                         | NA                                                | 0–1.05      | 0–216                    | NA                                 | 0–19.5                                            | 0–0.49      | 2–26                     | 0–54                    |
|                 | 2017 | 0–6.98                             | 1.4–32.6                                          | 0–1.03      | 0–198                    | NA                                 | 0–20.8                                            | 0–0.64      | 0–23                     | 4–66                    |
|                 | 2018 | 0–5.75                             | 2.2–26.6                                          | 0–1.27      | 0–246                    | NA                                 | 0–23.8                                            | 0–0.6       | 3–41                     | 0–54                    |
|                 | 2019 | 0–6.94                             | 0.7–38.4                                          | 0–1.21      | 0–236                    | 0–3.75                             | 0–35.8                                            | 0–0.68      | 2–46.4                   | 0–62                    |
|                 | 2020 | 0.037–7.27                         | 0–51.1                                            | 0.09–0.99   | 0–238                    | 0.025–3.4                          | 1.1–33.8                                          | 0.076–0.75  | 1.2–32.6                 | 1–64                    |
| Mar 23–May 1    | 2016 | 0–11.84                            | NA                                                | 0–1.23      | 0–266                    | NA                                 | 0–39.6                                            | 0–1.52      | 1–49                     | 0–74                    |
|                 | 2017 | 0–16.88                            | 1–39.5                                            | 0–1.29      | 0–198                    | NA                                 | 0–20.8                                            | 0–0.67      | 0–35                     | 4–77                    |
|                 | 2018 | 0–7.78                             | 2–37.4                                            | 0–1.27      | 0–246                    | NA                                 | 0–25.1                                            | 0–0.78      | 2–43                     | 0–65                    |
|                 | 2019 | 0–9.66                             | 0.3–55.8                                          | 0–1.45      | 0–236                    | 0–6.32                             | 0–35.8                                            | 0–0.68      | 1.5–46.4                 | 0–62                    |
|                 | 2020 | 0–7.27                             | 0–51.1                                            | 0–0.99      | 0–238                    | 0–3.4                              | 0–54.3                                            | 0–0.79      | 1.2–32.7                 | 0–64                    |

|                            |             |         |          |        |       |         |         |        |          |      |
|----------------------------|-------------|---------|----------|--------|-------|---------|---------|--------|----------|------|
| <b>Mar 23–<br/>May 20</b>  | <b>2016</b> | 0–11.84 | NA       | 0–1.23 | 0–266 | NA      | 0–39.6  | 0–1.52 | 1–49     | 0–74 |
|                            | <b>2017</b> | 0–16.88 | 1–39.5   | 0–1.29 | 0–198 | NA      | 0–22.6  | 0–0.67 | 0–35     | 1–77 |
|                            | <b>2018</b> | 0–7.78  | 2–49.5   | 0–1.27 | 0–246 | NA      | 0–30.6  | 0–0.78 | 2–47     | 0–68 |
|                            | <b>2019</b> | 0–9.66  | 0.3–55.8 | 0–1.45 | 0–236 | 0–6.32  | 0–37.6  | 0–0.78 | 1.5–46.4 | 0–70 |
|                            | <b>2020</b> | 0–7.27  | 0–51.1   | 0–1.04 | 0–238 | 0–3.4   | 0–54.3  | 0–0.79 | 1.2–34.3 | 0–64 |
| <b>May 20–<br/>June 30</b> | <b>2016</b> | 0–12.41 | NA       | 0–1.23 | 0–198 | NA      | 0–32.9  | 0–0.82 | 1–41     | 0–88 |
|                            | <b>2017</b> | 0–7.19  | 1–39.5   | 0–1.29 | 0–204 | NA      | 0–39.4  | 0–0.86 | 0–54     | 0–86 |
|                            | <b>2018</b> | 0–11.58 | 2–66.9   | 0–1.27 | 0–176 | NA      | 0–42.6  | 0–0.82 | 2–38     | 0–86 |
|                            | <b>2019</b> | 0–7.37  | 0–55.8   | 0–1.45 | 0–167 | 0–2.66  | 0–32.2  | 0–0.54 | 1.9–37.4 | 0–75 |
|                            | <b>2020</b> | 0–7.41  | 0–50.6   | 0–1.04 | 0–229 | 0–10.29 | 0–38.3  | 0–0.74 | 1–35.5   | 0–74 |
| <b>Mar 23–<br/>June 30</b> | <b>2016</b> | 0–12.41 | NA       | 0–1.04 | 0–266 | NA      | 0–39.6  | 0–1.52 | 1–49     | 0–88 |
|                            | <b>2017</b> | 0–16.88 | 1.5–27.9 | 0–1.03 | 0–204 | NA      | 0–39.4  | 0–0.86 | 0–54     | 0–86 |
|                            | <b>2018</b> | 0–11.58 | 2.7–66.9 | 0–1.07 | 0–246 | NA      | 0–42.6  | 0–0.82 | 2–47     | 0–86 |
|                            | <b>2019</b> | 0–9.66  | 0–29     | 0–0.98 | 0–236 | 0–6.32  | 0–37.6  | 0–0.78 | 1.5–46.4 | 0–75 |
|                            | <b>2020</b> | 0–7.41  | 0–50.6   | 0–0.86 | 0–238 | 0–10.29 | 0–54.3  | 0–0.79 | 1–35.5   | 0–74 |
| <b>June 30–<br/>Dec 11</b> | <b>2016</b> | 0–16.53 | NA       | 0–1.58 | 0–332 | NA      | 0–95.3  | 0–1.49 | 1–47     | 0–83 |
|                            | <b>2017</b> | 0–14.67 | 0.7–70.9 | 0–1.46 | 0–329 | NA      | 0–56.3  | 0–2.11 | 0–39     | 0–87 |
|                            | <b>2018</b> | 0–13.39 | 0.4–61.2 | 0–2.81 | 0–274 | NA      | 0–53.6  | 0–0.94 | 1–37     | 0–90 |
|                            | <b>2019</b> | 0–9.84  | 0–102.7  | 0–1.78 | 0–323 | 0–3.26  | 0–89.4  | 0–1.08 | 1.4–41.5 | 0–85 |
|                            | <b>2020</b> | 0–8.11  | 0–150.9  | 0–2.11 | 0–289 | 0–6.62  | 0–115.4 | 0–1.99 | 1–39.9   | 0–83 |

**Table S9.** Mean BC to PM<sub>2.5</sub> ratio measured at the Near Road and Taft site during each time period of interest from 2016 through 2020.

| BC:PM <sub>2.5</sub> Ratio |      |               |               |
|----------------------------|------|---------------|---------------|
| Time Period                | Year | Near Road     | Taft          |
| Jan 1–Mar 22               | 2016 | NA (NA)       | NA (NA)       |
|                            | 2017 | 0.155 (0.156) | NA (NA)       |
|                            | 2018 | 0.119 (0.088) | NA (NA)       |
|                            | 2019 | 0.092 (0.076) | 0.05 (0.062)  |
|                            | 2020 | 0.1 (0.52)    | 0.06 (0.04)   |
| Mar 23–April 10            | 2016 | NA (NA)       | NA (NA)       |
|                            | 2017 | 0.218 (0.271) | NA (NA)       |
|                            | 2018 | 0.124 (0.089) | NA (NA)       |
|                            | 2019 | 0.121 (0.477) | 0.055 (0.028) |
|                            | 2020 | 0.149 (0.517) | 0.047 (0.023) |
| Mar 23–May 1               | 2016 | NA (NA)       | NA (NA)       |
|                            | 2017 | 0.222 (0.261) | NA (NA)       |
|                            | 2018 | 0.112 (0.081) | NA (NA)       |
|                            | 2019 | 0.124 (0.337) | 0.052 (0.026) |
|                            | 2020 | 0.149 (0.497) | 0.039 (0.031) |
| Mar 23–May 20              | 2016 | NA (NA)       | NA (NA)       |
|                            | 2017 | 0.206 (0.225) | NA (NA)       |
|                            | 2018 | 0.107 (0.078) | NA (NA)       |
|                            | 2019 | 0.094 (0.299) | 0.052 (0.028) |
|                            | 2020 | 0.149 (0.629) | 0.048 (0.035) |
| May 20–June 30             | 2016 | NA (NA)       | NA (NA)       |
|                            | 2017 | 0.189 (0.186) | NA (NA)       |
|                            | 2018 | 0.103 (0.082) | NA (NA)       |
|                            | 2019 | 0.095 (0.231) | 0.053 (0.029) |

|                      |      |               |               |
|----------------------|------|---------------|---------------|
|                      | 2020 | 0.151 (0.726) | 0.055 (0.039) |
| Mar 23–June 30       | 2016 | NA (NA)       | NA (NA)       |
|                      | 2017 | 0.162 (0.103) | NA (NA)       |
|                      | 2018 | 0.099 (0.084) | NA (NA)       |
|                      | 2019 | 0.094 (0.085) | 0.055 (0.03)  |
|                      | 2020 | 0.157 (0.839) | 0.065 (0.043) |
| June 30–Dec 11       | 2016 | NA (NA)       | NA (NA)       |
|                      | 2017 | 0.15 (0.085)  | NA (NA)       |
|                      | 2018 | 0.11 (0.076)  | 0.058 (0.107) |
|                      | 2019 | 0.13 (0.324)  | 0.058 (0.058) |
|                      | 2020 | 0.17 (0.534)  | 0.067 (0.063) |
| <b>Year Averages</b> |      |               |               |
| 2016                 |      | NA (NA)       | NA (NA)       |
| 2017                 |      | 0.186 (0.184) | NA (NA)       |
| 2018                 |      | 0.111 (0.083) | 0.058 (0.107) |
| 2019                 |      | 0.107 (0.261) | 0.053 (0.037) |
| 2020                 |      | 0.146 (0.609) | 0.054 (0.039) |

### Air Quality *t*-Test Results

#### *PM<sub>2.5</sub> Near Road*

**Table S10.** Results of interannual *t*-tests for PM<sub>2.5</sub> concentrations over time periods of interest at the Near Road site for each year 2017 through 2020.

| 2020                    |               |                |                                                                    |                                                                    |                                     |                                             |
|-------------------------|---------------|----------------|--------------------------------------------------------------------|--------------------------------------------------------------------|-------------------------------------|---------------------------------------------|
| Time Period Description | Time Period 1 | Time Period 2  | Time Period 1<br>Avg. [PM <sub>2.5</sub> ]<br>(µg/m <sup>3</sup> ) | Time Period 2<br>Avg. [PM <sub>2.5</sub> ]<br>(µg/m <sup>3</sup> ) | % Change<br>Between<br>Time Periods | Two-sided<br><i>t</i> -test <i>p</i> -value |
| Beginning of Lockdown   | Jan 1–Mar 22  | Mar 23–Apr 10  | 10.2184                                                            | 11.8215                                                            | 15.6884%                            | 2.95 × 10 <sup>−5</sup>                     |
| Lockdown                | Jan 1–Mar 22  | Mar 23–May 1   | 10.2184                                                            | 10.1887                                                            | −0.2905%                            | 9.19 × 10 <sup>−1</sup>                     |
| Full Opening            | Jan 1–Mar 22  | Mar 23–May 20  | 10.2184                                                            | 9.8986                                                             | −3.1291%                            | 2.17 × 10 <sup>−1</sup>                     |
| May                     | Jan 1–Mar 23  | May 20–June 30 | 10.2184                                                            | 10.1648                                                            | −0.5245%                            | 4.79 × 10 <sup>−1</sup>                     |
| June 30                 | Jan 1–Mar 22  | Mar 23–June 30 | 10.2184                                                            | 10.3993                                                            | 1.7702%                             | 8.12 × 10 <sup>−1</sup>                     |
| Second Half of Year     | Jan 1–Mar 22  | July 1–Dec 11  | 10.2184                                                            | 11.6150                                                            | 13.6681%                            | 7.06 × 10 <sup>−12</sup>                    |
| 2019                    |               |                |                                                                    |                                                                    |                                     |                                             |
| Time Period Description | Time Period 1 | Time Period 2  | Time Period 1<br>Avg. [PM <sub>2.5</sub> ]<br>(µg/m <sup>3</sup> ) | Time Period 2<br>Avg. [PM <sub>2.5</sub> ]<br>(µg/m <sup>3</sup> ) | % Change<br>Between<br>Time Periods | Two-sided<br><i>t</i> -test <i>p</i> -value |
| Beginning of Lockdown   | Jan 1–Mar 22  | Mar 23–Apr 10  | 12.3417                                                            | 12.8313                                                            | 3.9664%                             | 1.927 × 10 <sup>−1</sup>                    |
| Lockdown                | Jan 1–Mar 22  | Mar 23–May 1   | 12.3417                                                            | 11.4699                                                            | −7.0644%                            | 2.238 × 10 <sup>−3</sup>                    |
| Full Opening            | Jan 1–Mar 22  | Mar 23–May 20  | 12.3417                                                            | 11.3590                                                            | −7.9628%                            | 1.726 × 10 <sup>−4</sup>                    |



|                     |              |                |         |         |           |                         |
|---------------------|--------------|----------------|---------|---------|-----------|-------------------------|
| May                 | Jan 1–Mar 23 | May 20–June 30 | 12.3417 | 11.0202 | −10.7082% | $1.800 \times 10^{-13}$ |
| June 30             | Jan 1–Mar 22 | Mar 23–June 30 | 12.3417 | 10.5078 | −14.8601% | $3.479 \times 10^{-9}$  |
| Second Half of Year | Jan 1–Mar 22 | July 1–Dec 11  | 12.3417 | 12.1122 | −1.8599%  | $2.530 \times 10^{-1}$  |

  

| 2018                    |               |                |                                                                    |                                                                    |                                     |                                                 |
|-------------------------|---------------|----------------|--------------------------------------------------------------------|--------------------------------------------------------------------|-------------------------------------|-------------------------------------------------|
| Time Period Description | Time Period 1 | Time Period 2  | Time Period 1<br>Avg. [PM <sub>2.5</sub> ]<br>(µg/m <sup>3</sup> ) | Time Period 2<br>Avg. [PM <sub>2.5</sub> ]<br>(µg/m <sup>3</sup> ) | % Change<br>Between<br>Time Periods | Two-sided<br><i>t</i> -test <i>p</i> -<br>value |
| Beginning of Lockdown   | Jan 1–Mar 22  | Mar 23–Apr 10  | 9.1857                                                             | 8.6754                                                             | −5.5556%                            | $1.727 \times 10^{-1}$                          |
| Lockdown                | Jan 1–Mar 22  | Mar 23–May 1   | 9.1857                                                             | 9.4932                                                             | 3.3475%                             | $3.458 \times 10^{-1}$                          |
| Full Opening            | Jan 1–Mar 22  | Mar 23–May 20  | 9.1857                                                             | 12.3063                                                            | 33.9718%                            | $1.253 \times 10^{-30}$                         |
| May                     | Jan 1–Mar 23  | May 20–June 30 | 9.1857                                                             | 12.6076                                                            | 37.2522%                            | $3.257 \times 10^{-52}$                         |
| June 30                 | Jan 1–Mar 22  | Mar 23–June 30 | 9.1857                                                             | 12.9849                                                            | 41.3596%                            | $2.469 \times 10^{-51}$                         |
| Second Half of Year     | Jan 1–Mar 22  | July 1–Dec 11  | 9.1857                                                             | 13.5532                                                            | 47.5463%                            | $8.221 \times 10^{-98}$                         |

  

| 2017                    |               |                |                                                                    |                                                                    |                                     |                                                 |
|-------------------------|---------------|----------------|--------------------------------------------------------------------|--------------------------------------------------------------------|-------------------------------------|-------------------------------------------------|
| Time Period Description | Time Period 1 | Time Period 2  | Time Period 1<br>Avg. [PM <sub>2.5</sub> ]<br>(µg/m <sup>3</sup> ) | Time Period 2<br>Avg. [PM <sub>2.5</sub> ]<br>(µg/m <sup>3</sup> ) | % Change<br>Between<br>Time Periods | Two-sided<br><i>t</i> -test <i>p</i> -<br>value |
| Beginning of Lockdown   | Jan 1–Mar 22  | Mar 23–Apr 10  | 10.1753                                                            | 9.4088                                                             | −7.5329%                            | $4.070 \times 10^{-2}$                          |
| Lockdown                | Jan 1–Mar 22  | Mar 23–May 1   | 10.1753                                                            | 10.4613                                                            | 2.8104%                             | $3.134 \times 10^{-1}$                          |
| Full Opening            | Jan 1–Mar 22  | Mar 23–May 20  | 10.1753                                                            | 10.7110                                                            | 5.2651%                             | $3.302 \times 10^{-2}$                          |
| May                     | Jan 1–Mar 23  | May 20–June 30 | 10.1753                                                            | 10.3544                                                            | 1.7599%                             | $2.786 \times 10^{-1}$                          |
| June 30                 | Jan 1–Mar 22  | Mar 23–June 30 | 10.1753                                                            | 9.9059                                                             | −2.6479%                            | $4.146 \times 10^{-1}$                          |
| Second Half of Year     | Jan 1–Mar 22  | July 1–Dec 11  | 10.1753                                                            | 12.7282                                                            | 25.0891%                            | $1.815 \times 10^{-37}$                         |

**Table S11.** Results of interannual *t*-tests for PM<sub>2.5</sub> concentrations over time periods of interest at the Near Road site for each year 2017 through 2020.

| Pre COVID: Jan 1–Mar 22 |        |                                                             |                                                             |                              |                                                 |
|-------------------------|--------|-------------------------------------------------------------|-------------------------------------------------------------|------------------------------|-------------------------------------------------|
| Year 1                  | Year 2 | Year 1<br>Avg. [PM <sub>2.5</sub> ]<br>(µg/m <sup>3</sup> ) | Year 2<br>Avg. [PM <sub>2.5</sub> ]<br>(µg/m <sup>3</sup> ) | % Change<br>Between<br>Years | Two-sided<br><i>t</i> -test <i>p</i> -<br>value |
| 2019                    | 2020   | 12.3417                                                     | 10.2184                                                     | −17.2047%                    | $1.288 \times 10^{-19}$                         |
| 2018                    | 2020   | 9.1857                                                      | 10.2184                                                     | 11.2422%                     | $1.009 \times 10^{-5}$                          |
| 2017                    | 2020   | 10.1753                                                     | 10.2184                                                     | 0.4233%                      | $8.538 \times 10^{-1}$                          |

| Beginning of Lockdown: March 23–April 10 |        |                                                                |                                                                |                              |                                             |
|------------------------------------------|--------|----------------------------------------------------------------|----------------------------------------------------------------|------------------------------|---------------------------------------------|
| Year 1                                   | Year 2 | Year 1<br>Avg.<br>[PM <sub>2.5</sub> ]<br>(µg/m <sup>3</sup> ) | Year 2<br>Avg.<br>[PM <sub>2.5</sub> ]<br>(µg/m <sup>3</sup> ) | % Change<br>Between Years    | Two-sided<br><i>t</i> -test <i>p</i> -value |
| 2019                                     | 2020   | 12.8313                                                        | 11.8215                                                        | −7.8697%                     | $3.669 \times 10^{-2}$                      |
| 2018                                     | 2020   | 8.6754                                                         | 11.8215                                                        | 36.2646%                     | $6.957 \times 10^{-11}$                     |
| 2017                                     | 2020   | 9.4088                                                         | 11.8215                                                        | 25.6426%                     | $5.760 \times 10^{-7}$                      |
| Lockdown: March 23–May 1                 |        |                                                                |                                                                |                              |                                             |
| Year 1                                   | Year 2 | Year 1<br>Avg.<br>[PM <sub>2.5</sub> ]<br>(µg/m <sup>3</sup> ) | Year 2<br>Avg.<br>[PM <sub>2.5</sub> ]<br>(µg/m <sup>3</sup> ) | % Change<br>Between Years    | Two-sided<br><i>t</i> -test <i>p</i> -value |
| 2019                                     | 2020   | 11.4699                                                        | 10.1887                                                        | −11.1700%                    | $1.911 \times 10^{-1}$                      |
| 2018                                     | 2020   | 9.4932                                                         | 10.1887                                                        | 7.3262%                      | $1.239 \times 10^{-19}$                     |
| 2017                                     | 2020   | 10.4613                                                        | 10.1887                                                        | −2.6056%                     | $4.827 \times 10^{-13}$                     |
| Full Opening: March 23–May 20            |        |                                                                |                                                                |                              |                                             |
| Year 1                                   | Year 2 | Year 1<br>Avg. [PM <sub>2.5</sub> ]<br>(µg/m <sup>3</sup> )    | Year 2<br>Avg. [PM <sub>2.5</sub> ]<br>(µg/m <sup>3</sup> )    | % Change<br>Between Years    | Two-sided<br><i>t</i> -test <i>p</i> -value |
| 2019                                     | 2020   | 11.3590                                                        | 9.8986                                                         | −12.8564%                    | $2.730 \times 10^{-7}$                      |
| 2018                                     | 2020   | 12.3063                                                        | 9.8986                                                         | −19.5642%                    | $2.132 \times 10^{-16}$                     |
| 2017                                     | 2020   | 10.7110                                                        | 9.8986                                                         | −7.5848%                     | $3.122 \times 10^{-3}$                      |
| May: May 20–June 30                      |        |                                                                |                                                                |                              |                                             |
| Year 1                                   | Year 2 | Year 1<br>Avg. [PM <sub>2.5</sub> ]<br>(µg/m <sup>3</sup> )    | Year 2<br>Avg. [PM <sub>2.5</sub> ]<br>(µg/m <sup>3</sup> )    | % Change<br>Between<br>Years | Two-sided<br><i>t</i> -test <i>p</i> -value |
| 2019                                     | 2020   | 11.020                                                         | 10.165                                                         | −7.7620%                     | $7.077 \times 10^{-1}$                      |
| 2018                                     | 2020   | 12.608                                                         | 10.165                                                         | −19.3756%                    | $4.718 \times 10^{-19}$                     |
| 2017                                     | 2020   | 10.354                                                         | 10.165                                                         | −1.8312%                     | $8.833 \times 10^{-2}$                      |
| Through June: March 23–June 30           |        |                                                                |                                                                |                              |                                             |
| Year 1                                   | Year 2 | Year 1<br>Avg.<br>[PM <sub>2.5</sub> ]<br>(µg/m <sup>3</sup> ) | Year 2<br>Avg.<br>[PM <sub>2.5</sub> ]<br>(µg/m <sup>3</sup> ) | % Change<br>Between Years    | Two-sided<br><i>t</i> -test <i>p</i> -value |
| 2019                                     | 2020   | 10.5078                                                        | 10.3993                                                        | −1.0325%                     | $6.891 \times 10^{-5}$                      |
| 2018                                     | 2020   | 12.9849                                                        | 10.3993                                                        | −19.9125%                    | $5.469 \times 10^{-29}$                     |
| 2017                                     | 2020   | 9.9059                                                         | 10.3993                                                        | 4.9807%                      | $3.689 \times 10^{-1}$                      |

| Year 1 | Year 2 | Year 1<br>Avg.<br>[PM <sub>2.5</sub> ]<br>(µg/m <sup>3</sup> ) | Year 2<br>Avg.<br>[PM <sub>2.5</sub> ]<br>(µg/m <sup>3</sup> ) | % Change<br>Between Years | Two-sided<br><i>t</i> -test <i>p</i> -value |
|--------|--------|----------------------------------------------------------------|----------------------------------------------------------------|---------------------------|---------------------------------------------|
| 2019   | 2020   | 12.1122                                                        | 11.6150                                                        | −4.1046%                  | $2.456 \times 10^{-3}$                      |
| 2018   | 2020   | 13.5532                                                        | 11.6150                                                        | −14.3002%                 | $3.651 \times 10^{-29}$                     |
| 2017   | 2020   | 12.7282                                                        | 11.6150                                                        | −8.7456%                  | $8.551 \times 10^{-12}$                     |

*PM<sub>2.5</sub> Taft***Table S12.** Results of interannual *t*-tests for PM<sub>2.5</sub> concentrations over time periods of interest at the Taft site for each year 2016 through 2020.

| 2020                    |               |                |                                                                 |                                                                 |                               |                                          |
|-------------------------|---------------|----------------|-----------------------------------------------------------------|-----------------------------------------------------------------|-------------------------------|------------------------------------------|
| Time Period Description | Time Period 1 | Time Period 2  | Time Period 1 Avg. [PM <sub>2.5</sub> ]<br>(µg/m <sup>3</sup> ) | Time Period 2 Avg. [PM <sub>2.5</sub> ]<br>(µg/m <sup>3</sup> ) | % Change Between Time Periods | Two-sided <i>t</i> -test <i>p</i> -value |
| Beginning of Lockdown   | Jan 1–Mar 22  | Mar 23–Apr 10  | 8.1603                                                          | 10.0787                                                         | 23.5095%                      | $1.05 \times 10^{-10}$                   |
| Lockdown                | Jan 1–Mar 22  | Mar 23–May 1   | 8.1603                                                          | 8.9306                                                          | 9.4401%                       | $6.22 \times 10^{-4}$                    |
| Full Opening            | Jan 1–Mar 22  | Mar 23–May 20  | 8.1603                                                          | 8.4892                                                          | 4.0306%                       | $9.90 \times 10^{-2}$                    |
| May                     | Jan 1–Mar 23  | May 20–June 30 | 8.1603                                                          | 9.4265                                                          | 15.5166%                      | $5.51 \times 10^{-10}$                   |
| June 30                 | Jan 1–Mar 22  | Mar 23–June 30 | 8.1603                                                          | 8.9314                                                          | 9.4493%                       | $9.52 \times 10^{-6}$                    |
| Second Half of Year     | Jan 1–Mar 22  | July 1–Dec 11  | 8.1603                                                          | 9.3218                                                          | 14.2341%                      | $2.13 \times 10^{-13}$                   |
| 2019                    |               |                |                                                                 |                                                                 |                               |                                          |
| Time Period Description | Time Period 1 | Time Period 2  | Time Period 1 Avg. [PM <sub>2.5</sub> ]<br>(µg/m <sup>3</sup> ) | Time Period 2 Avg. [PM <sub>2.5</sub> ]<br>(µg/m <sup>3</sup> ) | % Change Between Time Periods | Two-sided <i>t</i> -test <i>p</i> -value |
| Beginning of Lockdown   | Jan 1–Mar 22  | Mar 23–Apr 10  | 10.0524                                                         | 9.9632                                                          | −0.8882%                      | $7.637 \times 10^{-1}$                   |
| Lockdown                | Jan 1–Mar 22  | Mar 23–May 1   | 10.0524                                                         | 8.9174                                                          | −11.2913%                     | $4.647 \times 10^{-7}$                   |
| Full Opening            | Jan 1–Mar 22  | Mar 23–May 20  | 10.0524                                                         | 9.3461                                                          | −7.0265%                      | $3.980 \times 10^{-4}$                   |
| May                     | Jan 1–Mar 23  | May 20–June 30 | 10.0524                                                         | 9.8254                                                          | −2.2587%                      | $2.658 \times 10^{-1}$                   |
| June 30                 | Jan 1–Mar 22  | Mar 23–June 30 | 10.0524                                                         | 9.5883                                                          | −4.6178%                      | $7.708 \times 10^{-3}$                   |
| Second Half of Year     | Jan 1–Mar 22  | July 1–Dec 11  | 10.0524                                                         | 10.5360                                                         | 4.8104%                       | $2.251 \times 10^{-3}$                   |
| 2018                    |               |                |                                                                 |                                                                 |                               |                                          |
| Time Period Description | Time Period 1 | Time Period 2  | Time Period 1 Avg. [PM <sub>2.5</sub> ]<br>(µg/m <sup>3</sup> ) | Time Period 2 Avg. [PM <sub>2.5</sub> ]<br>(µg/m <sup>3</sup> ) | % Change Between Time Periods | Two-sided <i>t</i> -test <i>p</i> -value |
| Beginning of Lockdown   | Jan 1–Mar 22  | Mar 23–Apr 10  | 9.6112                                                          | 7.5428                                                          | −21.5212%                     | $3.293 \times 10^{-12}$                  |
| Lockdown                | Jan 1–Mar 22  | Mar 23–May 1   | 9.6112                                                          | 7.8669                                                          | −18.1490%                     | $9.426 \times 10^{-15}$                  |
| Full Opening            | Jan 1–Mar 22  | Mar 23–May 20  | 9.6112                                                          | 9.8571                                                          | 2.5579%                       | $2.175 \times 10^{-1}$                   |
| May                     | Jan 1–Mar 23  | May 20–June 30 | 9.6112                                                          | 10.7505                                                         | 11.8537%                      | $2.367 \times 10^{-8}$                   |
| June 30                 | Jan 1–Mar 22  | Mar 23–June 30 | 9.6112                                                          | 10.1945                                                         | 6.0692%                       | $4.147 \times 10^{-1}$                   |
| Second Half of Year     | Jan 1–Mar 22  | July 1–Dec 11  | 9.6112                                                          | 10.9050                                                         | 13.4613%                      | $2.950 \times 10^{-16}$                  |

| 2017                    |               |                |                                                              |                                                              |                               |                                          |
|-------------------------|---------------|----------------|--------------------------------------------------------------|--------------------------------------------------------------|-------------------------------|------------------------------------------|
| Time Period Description | Time Period 1 | Time Period 2  | Time Period 1 Avg. [PM <sub>2.5</sub> ] (µg/m <sup>3</sup> ) | Time Period 2 Avg. [PM <sub>2.5</sub> ] (µg/m <sup>3</sup> ) | % Change Between Time Periods | Two-sided <i>t</i> -test <i>p</i> -value |
| Beginning of Lockdown   | Jan 1–Mar 22  | Mar 23–Apr 10  | 6.9720                                                       | 6.3272                                                       | −9.2481%                      | $2.990 \times 10^{-2}$                   |
| Lockdown                | Jan 1–Mar 22  | Mar 23–May 1   | 6.9720                                                       | 7.0481                                                       | 1.0924%                       | $7.351 \times 10^{-1}$                   |
| Full Opening            | Jan 1–Mar 22  | Mar 23–May 20  | 6.9720                                                       | 7.4574                                                       | 6.9629%                       | $1.490 \times 10^{-2}$                   |
| May                     | Jan 1–Mar 23  | May 20–June 30 | 6.9720                                                       | 8.2787                                                       | 18.7423%                      | $1.532 \times 10^{-10}$                  |
| June 30                 | Jan 1–Mar 22  | Mar 23–June 30 | 6.9720                                                       | 7.7726                                                       | 11.4840%                      | $4.273 \times 10^{-6}$                   |
| Second Half of Year     | Jan 1–Mar 22  | July 1–Dec 11  | 6.9720                                                       | 6.4042                                                       | −8.1440%                      | $3.321 \times 10^{-4}$                   |

  

| 2016                    |               |                |                                                              |                                                              |                               |                                          |
|-------------------------|---------------|----------------|--------------------------------------------------------------|--------------------------------------------------------------|-------------------------------|------------------------------------------|
| Time Period Description | Time Period 1 | Time Period 2  | Time Period 1 Avg. [PM <sub>2.5</sub> ] (µg/m <sup>3</sup> ) | Time Period 2 Avg. [PM <sub>2.5</sub> ] (µg/m <sup>3</sup> ) | % Change Between Time Periods | Two-sided <i>t</i> -test <i>p</i> -value |
| Beginning of Lockdown   | Jan 1–Mar 22  | Mar 23–Apr 10  | 7.6736                                                       | 5.8377                                                       | −23.9247%                     | $6.335 \times 10^{-10}$                  |
| Lockdown                | Jan 1–Mar 22  | Mar 23–May 1   | 7.6736                                                       | 7.5057                                                       | −2.1878%                      | $1.774 \times 10^{-2}$                   |
| Full Opening            | Jan 1–Mar 22  | Mar 23–May 20  | 7.6736                                                       | 7.1550                                                       | −6.7580%                      | $3.589 \times 10^{-1}$                   |
| May                     | Jan 1–Mar 23  | May 20–June 30 | 7.6736                                                       | 8.9136                                                       | 16.1594%                      | $1.265 \times 10^{-9}$                   |
| June 30                 | Jan 1–Mar 22  | Mar 23–June 30 | 7.6736                                                       | 7.8673                                                       | 2.5235%                       | $2.776 \times 10^{-7}$                   |
| Second Half of Year     | Jan 1–Mar 22  | July 1–Dec 11  | 7.6736                                                       | 8.9670                                                       | 16.8552%                      | $2.063 \times 10^{-36}$                  |

**Table S13.** Results of interannual *t*-tests for PM<sub>2.5</sub> concentrations over time periods of interest at the Taft site for each year 2016 through 2020.

| Pre COVID: Jan 1–Mar 22 |        |                                                       |                                                       |                        |                                          |
|-------------------------|--------|-------------------------------------------------------|-------------------------------------------------------|------------------------|------------------------------------------|
| Year 1                  | Year 2 | Year 1 Avg. [PM <sub>2.5</sub> ] (µg/m <sup>3</sup> ) | Year 2 Avg. [PM <sub>2.5</sub> ] (µg/m <sup>3</sup> ) | % Change Between Years | Two-sided <i>t</i> -test <i>p</i> -value |
| 2019                    | 2020   | 10.0524                                               | 8.1603                                                | −18.8229%              | $5.239 \times 10^{-25}$                  |
| 2018                    | 2020   | 9.6112                                                | 8.1603                                                | −15.0962%              | $2.289 \times 10^{-15}$                  |
| 2017                    | 2020   | 6.9720                                                | 8.1603                                                | 17.0443%               | $8.531 \times 10^{-11}$                  |
| 2016                    | 2020   | 7.6736                                                | 8.1603                                                | 6.3422%                | $7.843 \times 10^{-3}$                   |

  

| Beginning of Lockdown: March 23–April 10 |        |                                                       |                                                       |                        |                                          |
|------------------------------------------|--------|-------------------------------------------------------|-------------------------------------------------------|------------------------|------------------------------------------|
| Year 1                                   | Year 2 | Year 1 Avg. [PM <sub>2.5</sub> ] (µg/m <sup>3</sup> ) | Year 2 Avg. [PM <sub>2.5</sub> ] (µg/m <sup>3</sup> ) | % Change Between Years | Two-sided <i>t</i> -test <i>p</i> -value |
| 2019                                     | 2020   | 9.9632                                                | 10.0787                                               | 1.1600%                | $7.598 \times 10^{-1}$                   |
| 2018                                     | 2020   | 7.5428                                                | 10.0787                                               | 33.6212%               | $1.962 \times 10^{-11}$                  |
| 2017                                     | 2020   | 6.3272                                                | 10.0787                                               | 59.2923%               | $3.335 \times 10^{-23}$                  |
| 2016                                     | 2020   | 5.8377                                                | 10.0787                                               | 72.6484%               | $3.429 \times 10^{-29}$                  |

  

| Lockdown: March 23–May 1 |  |  |  |  |  |
|--------------------------|--|--|--|--|--|
|--------------------------|--|--|--|--|--|

| Year 1 | Year 2 | Year 1<br>Avg. [PM <sub>2.5</sub> ]<br>(µg/m <sup>3</sup> ) | Year 2<br>Avg. [PM <sub>2.5</sub> ]<br>(µg/m <sup>3</sup> ) | % Change<br>Between Years | Two-sided<br><i>t</i> -test <i>p</i> -value |
|--------|--------|-------------------------------------------------------------|-------------------------------------------------------------|---------------------------|---------------------------------------------|
| 2019   | 2020   | 8.9174                                                      | 8.9306                                                      | 0.1484%                   | $9.595 \times 10^{-1}$                      |
| 2018   | 2020   | 7.8669                                                      | 8.9306                                                      | 13.5219%                  | $4.433 \times 10^{-5}$                      |
| 2017   | 2020   | 7.0481                                                      | 8.9306                                                      | 26.7092%                  | $4.988 \times 10^{-13}$                     |
| 2016   | 2020   | 7.5057                                                      | 8.9306                                                      | 18.9841%                  | $4.507 \times 10^{-8}$                      |

  

| Full Opening: March 23–May 20 |        |                                                             |                                                             |                           |                                             |
|-------------------------------|--------|-------------------------------------------------------------|-------------------------------------------------------------|---------------------------|---------------------------------------------|
| Year 1                        | Year 2 | Year 1<br>Avg. [PM <sub>2.5</sub> ]<br>(µg/m <sup>3</sup> ) | Year 2<br>Avg. [PM <sub>2.5</sub> ]<br>(µg/m <sup>3</sup> ) | % Change<br>Between Years | Two-sided<br><i>t</i> -test <i>p</i> -value |
| 2019                          | 2020   | 9.3461                                                      | 8.4892                                                      | −9.1687%                  | $6.462 \times 10^{-5}$                      |
| 2018                          | 2020   | 9.8571                                                      | 8.4892                                                      | −13.8770%                 | $1.808 \times 10^{-10}$                     |
| 2017                          | 2020   | 7.4574                                                      | 8.4892                                                      | 13.8356%                  | $1.506 \times 10^{-6}$                      |
| 2016                          | 2020   | 7.1550                                                      | 8.4892                                                      | 18.6466%                  | $5.121 \times 10^{-10}$                     |

  

| May: May 20–June 30 |        |                                                             |                                                             |                           |                                             |
|---------------------|--------|-------------------------------------------------------------|-------------------------------------------------------------|---------------------------|---------------------------------------------|
| Year 1              | Year 2 | Year 1<br>Avg. [PM <sub>2.5</sub> ]<br>(µg/m <sup>3</sup> ) | Year 2<br>Avg. [PM <sub>2.5</sub> ]<br>(µg/m <sup>3</sup> ) | % Change<br>Between Years | Two-sided<br><i>t</i> -test <i>p</i> -value |
| 2019                | 2020   | 9.8254                                                      | 9.4265                                                      | −4.0600%                  | $8.836 \times 10^{-2}$                      |
| 2018                | 2020   | 10.7505                                                     | 9.4265                                                      | −12.3158%                 | $1.574 \times 10^{-8}$                      |
| 2017                | 2020   | 8.2787                                                      | 9.4265                                                      | 13.8648%                  | $9.505 \times 10^{-7}$                      |
| 2016                | 2020   | 8.9136                                                      | 9.4265                                                      | 5.7538%                   | $2.854 \times 10^{-2}$                      |

  

| Through June: March 23–June 30 |        |                                                             |                                                             |                           |                                             |
|--------------------------------|--------|-------------------------------------------------------------|-------------------------------------------------------------|---------------------------|---------------------------------------------|
| Year 1                         | Year 2 | Year 1<br>Avg. [PM <sub>2.5</sub> ]<br>(µg/m <sup>3</sup> ) | Year 2<br>Avg. [PM <sub>2.5</sub> ]<br>(µg/m <sup>3</sup> ) | % Change<br>Between Years | Two-sided<br><i>t</i> -test <i>p</i> -value |
| 2019                           | 2020   | 9.5883                                                      | 8.9314                                                      | −6.8508%                  | $6.687 \times 10^{-5}$                      |
| 2018                           | 2020   | 10.1945                                                     | 8.9314                                                      | −12.3906%                 | $1.777 \times 10^{-14}$                     |
| 2017                           | 2020   | 7.7726                                                      | 8.9314                                                      | 14.9081%                  | $2.030 \times 10^{-12}$                     |
| 2016                           | 2020   | 7.8673                                                      | 8.9314                                                      | 13.5260%                  | $1.087 \times 10^{-10}$                     |

  

| Second Half of Year: July 1–Dec 11 |        |                                                             |                                                             |                           |                                              |
|------------------------------------|--------|-------------------------------------------------------------|-------------------------------------------------------------|---------------------------|----------------------------------------------|
| Year 1                             | Year 2 | Year 1<br>Avg. [PM <sub>2.5</sub> ]<br>(µg/m <sup>3</sup> ) | Year 2<br>Avg. [PM <sub>2.5</sub> ]<br>(µg/m <sup>3</sup> ) | % Change<br>Between Years | Two-sided <i>t</i> -<br>test <i>p</i> -value |
| 2019                               | 2020   | 10.5360                                                     | 9.3218                                                      | −11.5241%                 | $3.954 \times 10^{-21}$                      |
| 2018                               | 2020   | 10.9050                                                     | 9.3218                                                      | −14.5179%                 | $9.447 \times 10^{-35}$                      |
| 2017                               | 2020   | 6.4042                                                      | 9.3218                                                      | 45.5588%                  | $2.394 \times 10^{-113}$                     |
| 2016                               | 2020   | 8.9670                                                      | 9.3218                                                      | 3.9569%                   | $5.819 \times 10^{-3}$                       |

Near Road: BC

**Table S14.** Results of interannual *t*-tests for BC concentrations over time periods of interest at the Near Road site for each year 2016 through 2020.

| 2020                     |               |                |                                                            |                                                            |                                     |                                              |
|--------------------------|---------------|----------------|------------------------------------------------------------|------------------------------------------------------------|-------------------------------------|----------------------------------------------|
|                          | Time Period 1 | Time Period 2  | Time Period 1<br>Avg. [BC]<br>( $\mu\text{g}/\text{m}^3$ ) | Time Period 2<br>Avg. [BC]<br>( $\mu\text{g}/\text{m}^3$ ) | % Change<br>Between<br>Time Periods | Two-sided <i>t</i> -<br>test <i>p</i> -value |
| Beginning of<br>Lockdown | Jan 1–Mar 22  | Mar 23–Apr 10  | 1.0594                                                     | 1.1899                                                     | 12.3128%                            | $6.17 \times 10^{-2}$                        |
| Lockdown                 | Jan 1–Mar 22  | Mar 23–May 1   | 1.0594                                                     | 0.9961                                                     | −5.9750%                            | $2.32 \times 10^{-1}$                        |
| Full Opening             | Jan 1–Mar 22  | Mar 23–May 20  | 1.0594                                                     | 0.9817                                                     | −7.3398%                            | $9.71 \times 10^{-2}$                        |
| May                      | Jan 1–Mar 23  | May 20–June 30 | 1.0594                                                     | 1.1355                                                     | 7.1789%                             | $2.46 \times 10^{-28}$                       |
| June 30                  | Jan 1–Mar 22  | Mar 23–June 30 | 1.0594                                                     | 1.0499                                                     | −0.8963%                            | $8.17 \times 10^{-1}$                        |
| Second Half of Year      | Jan 1–Mar 22  | July 1–Dec 11  | 1.0594                                                     | 1.6554                                                     | 56.2572%                            | $1.12 \times 10^{-57}$                       |

| 2019                     |               |                |                                                            |                                                            |                                     |                                              |
|--------------------------|---------------|----------------|------------------------------------------------------------|------------------------------------------------------------|-------------------------------------|----------------------------------------------|
|                          | Time Period 1 | Time Period 2  | Time Period 1<br>Avg. [BC]<br>( $\mu\text{g}/\text{m}^3$ ) | Time Period 2<br>Avg. [BC]<br>( $\mu\text{g}/\text{m}^3$ ) | % Change<br>Between<br>Time Periods | Two-sided <i>t</i> -<br>test <i>p</i> -value |
| Beginning of<br>Lockdown | Jan 1–Mar 22  | Mar 23–Apr 10  | 1.0933                                                     | 1.6824                                                     | 53.8880%                            | $3.24 \times 10^{-17}$                       |
| Lockdown                 | Jan 1–Mar 22  | Mar 23–May 1   | 1.0933                                                     | 1.4088                                                     | 28.8611%                            | $2.50 \times 10^{-9}$                        |
| Full Opening             | Jan 1–Mar 22  | Mar 23–May 20  | 1.0933                                                     | 0.9551                                                     | −12.6365%                           | $3.20 \times 10^{-3}$                        |
| May                      | Jan 1–Mar 22  | May 20–June 30 | 1.0933                                                     | 0.9369                                                     | −14.3053%                           | $8.35 \times 10^{-4}$                        |
| June 30                  | Jan 1–Mar 22  | Mar 23–June 30 | 1.0933                                                     | 0.9570                                                     | −12.4638%                           | $8.73 \times 10^{-4}$                        |
| Second Half of Year      | Jan 1–Mar 22  | July 1–Dec 11  | 1.0933                                                     | 1.4881                                                     | 36.1120%                            | $2.65 \times 10^{-26}$                       |

| 2018                     |               |                |                                                            |                                                            |                                     |                                              |
|--------------------------|---------------|----------------|------------------------------------------------------------|------------------------------------------------------------|-------------------------------------|----------------------------------------------|
|                          | Time Period 1 | Time Period 2  | Time Period 1<br>Avg. [BC]<br>( $\mu\text{g}/\text{m}^3$ ) | Time Period 2<br>Avg. [BC]<br>( $\mu\text{g}/\text{m}^3$ ) | % Change<br>Between<br>Time Periods | Two-sided <i>t</i> -<br>test <i>p</i> -value |
| Beginning of<br>Lockdown | Jan 1–Mar 22  | Mar 23–Apr 10  | 1.0704                                                     | 1.1293                                                     | 5.5012%                             | $3.99 \times 10^{-1}$                        |
| Lockdown                 | Jan 1–Mar 22  | Mar 23–May 1   | 1.0704                                                     | 1.1654                                                     | 8.8780%                             | $7.25 \times 10^{-2}$                        |
| Full Opening             | Jan 1–Mar 22  | Mar 23–May 20  | 1.0704                                                     | 1.2666                                                     | 18.3286%                            | $2.84 \times 10^{-5}$                        |
| May                      | Jan 1–Mar 23  | May 20–June 30 | 1.0704                                                     | 1.2413                                                     | 15.9709%                            | $2.60 \times 10^{-4}$                        |
| June 30                  | Jan 1–Mar 22  | Mar 23–June 30 | 1.0704                                                     | 1.2540                                                     | 17.1533%                            | $8.62 \times 10^{-5}$                        |
| Second Half of Year      | Jan 1–Mar 22  | July 1–Dec 11  | 1.0704                                                     | 1.4867                                                     | 38.8926%                            | $4.66 \times 10^{-29}$                       |

| 2017                     |               |                |                                                            |                                                            |                                     |                                              |
|--------------------------|---------------|----------------|------------------------------------------------------------|------------------------------------------------------------|-------------------------------------|----------------------------------------------|
|                          | Time Period 1 | Time Period 2  | Time Period 1<br>Avg. [BC]<br>( $\mu\text{g}/\text{m}^3$ ) | Time Period 2<br>Avg. [BC]<br>( $\mu\text{g}/\text{m}^3$ ) | % Change<br>Between<br>Time Periods | Two-sided <i>t</i> -<br>test <i>p</i> -value |
| Beginning of<br>Lockdown | Jan 1–Mar 22  | Mar 23–Apr 10  | 1.3335                                                     | 1.3274                                                     | −0.4617%                            | $9.30 \times 10^{-1}$                        |
| Lockdown                 | Jan 1–Mar 22  | Mar 23–May 1   | 1.3335                                                     | 1.4730                                                     | 10.4553%                            | $8.42 \times 10^{-3}$                        |
| Full Opening             | Jan 1–Mar 22  | Mar 23–May 20  | 1.3335                                                     | 1.5460                                                     | 15.9294%                            | $5.84 \times 10^{-6}$                        |
| May                      | Jan 1–Mar 23  | May 20–June 30 | 1.3335                                                     | 1.4804                                                     | 11.0115%                            | $1.71 \times 10^{-3}$                        |
| June 30                  | Jan 1–Mar 22  | Mar 23–June 30 | 1.3335                                                     | 1.5223                                                     | 14.1545%                            | $4.01 \times 10^{-6}$                        |

|                       |                      |                      |                                                                      |                                                                      |                                      |                                               |
|-----------------------|----------------------|----------------------|----------------------------------------------------------------------|----------------------------------------------------------------------|--------------------------------------|-----------------------------------------------|
| Second Half of Year   | Jan 1–Mar 22         | July 1–Dec 11        | 1.3335                                                               | 1.8721                                                               | 40.3826%                             | $1.94 \times 10^{-47}$                        |
| <b>2016</b>           |                      |                      |                                                                      |                                                                      |                                      |                                               |
|                       | <b>Time Period 1</b> | <b>Time Period 2</b> | <b>Time Period 1 Avg. [BC] (<math>\mu\text{g}/\text{m}^3</math>)</b> | <b>Time Period 2 Avg. [BC] (<math>\mu\text{g}/\text{m}^3</math>)</b> | <b>% Change Between Time Periods</b> | <b>Two-sided <i>t</i>-test <i>p</i>-value</b> |
| Beginning of Lockdown | Jan 1–Mar 22         | Mar 23–Apr 10        | 1.6532                                                               | 1.1726                                                               | −29.0726%                            | $5.81 \times 10^{-12}$                        |
| Lockdown              | Jan 1–Mar 22         | Mar 23–May 1         | 1.6532                                                               | 1.8894                                                               | 14.2879%                             | $8.69 \times 10^{-26}$                        |
| Full Opening          | Jan 1–Mar 22         | Mar 23–May 20        | 1.6532                                                               | 2.0616                                                               | 24.7036%                             | $2.63 \times 10^{-54}$                        |
| May                   | Jan 1–Mar 23         | May 20–June 30       | 1.6532                                                               | 2.8869                                                               | 74.6262%                             | $1.10 \times 10^{-149}$                       |
| June 30               | Jan 1–Mar 22         | Mar 23–June 30       | 1.6532                                                               | 2.3943                                                               | 44.8254%                             | $3.51 \times 10^{-147}$                       |
| Second Half of Year   | Jan 1–Mar 22         | July 1–Dec 11        | 1.6532                                                               | 2.9693                                                               | 79.6049%                             | 0.00                                          |

**Table S15.** Results of interannual *t*-tests for BC concentrations over time periods of interest at the Near Road site for each year 2016 through 2020.

| <b>Pre COVID: Jan 1–Mar 22</b>                  |                      |                                                                      |                                                                      |                               |                                               |
|-------------------------------------------------|----------------------|----------------------------------------------------------------------|----------------------------------------------------------------------|-------------------------------|-----------------------------------------------|
| <b>Time Periods Compared</b>                    |                      | <b>Near Road</b>                                                     |                                                                      |                               |                                               |
| <b>Time Period 1</b>                            | <b>Time Period 2</b> | <b>Time Period 1 Avg. [BC] (<math>\mu\text{g}/\text{m}^3</math>)</b> | <b>Time Period 2 Avg. [BC] (<math>\mu\text{g}/\text{m}^3</math>)</b> | <b>% Change Between Years</b> | <b>Two-sided <i>t</i>-test <i>p</i>-value</b> |
| 2019                                            | 2020                 | 1.0933                                                               | 1.0594                                                               | −3.0952%                      | $4.316 \times 10^{-1}$                        |
| 2018                                            | 2020                 | 1.0704                                                               | 1.0594                                                               | −1.0244%                      | $7.989 \times 10^{-1}$                        |
| 2017                                            | 2020                 | 1.3335                                                               | 1.0594                                                               | −20.5563%                     | $1.894 \times 10^{-10}$                       |
| 2016                                            | 2020                 | 1.6532                                                               | 1.0594                                                               | −35.9178%                     | $2.993 \times 10^{-43}$                       |
| <b>Beginning of Lockdown: March 23–April 10</b> |                      |                                                                      |                                                                      |                               |                                               |
| <b>Time Period 1</b>                            | <b>Time Period 2</b> | <b>Time Period 1 Avg. [BC] (<math>\mu\text{g}/\text{m}^3</math>)</b> | <b>Time Period 2 Avg. [BC] (<math>\mu\text{g}/\text{m}^3</math>)</b> | <b>% Change Between Years</b> | <b>Two-sided <i>t</i>-test <i>p</i>-value</b> |
| 2019                                            | 2020                 | 1.6824                                                               | 1.1899                                                               | −29.2756%                     | $2.972 \times 10^{-8}$                        |
| 2018                                            | 2020                 | 1.1293                                                               | 1.1899                                                               | 5.3658%                       | $4.952 \times 10^{-1}$                        |
| 2017                                            | 2020                 | 1.3274                                                               | 1.1899                                                               | −10.3607%                     | $1.216 \times 10^{-1}$                        |
| 2016                                            | 2020                 | 1.1726                                                               | 1.1899                                                               | 1.4734%                       | $8.458 \times 10^{-1}$                        |
| <b>Lockdown: March 23–May 1</b>                 |                      |                                                                      |                                                                      |                               |                                               |
| <b>Time Period 1</b>                            | <b>Time Period 2</b> | <b>Time Period 1 Avg. [BC] (<math>\mu\text{g}/\text{m}^3</math>)</b> | <b>Time Period 2 Avg. [BC] (<math>\mu\text{g}/\text{m}^3</math>)</b> | <b>% Change Between Years</b> | <b>Two-sided <i>t</i>-test <i>p</i>-value</b> |
| 2019                                            | 2020                 | 1.4088                                                               | 0.9961                                                               | −29.2923%                     | $1.604 \times 10^{-11}$                       |
| 2018                                            | 2020                 | 1.1654                                                               | 0.9961                                                               | −14.5265%                     | $5.696 \times 10^{-3}$                        |
| 2017                                            | 2020                 | 1.4730                                                               | 0.9961                                                               | −32.3737%                     | $6.930 \times 10^{-15}$                       |
| 2016                                            | 2020                 | 1.8894                                                               | 0.9961                                                               | −47.2795%                     | $4.027 \times 10^{-48}$                       |
| <b>Full Opening: March 23–May 20</b>            |                      |                                                                      |                                                                      |                               |                                               |
| <b>Time Period 1</b>                            | <b>Time Period 2</b> | <b>Time Period 1 Avg. [BC] (<math>\mu\text{g}/\text{m}^3</math>)</b> | <b>Time Period 2 Avg. [BC] (<math>\mu\text{g}/\text{m}^3</math>)</b> | <b>% Change Between Years</b> | <b>Two-sided <i>t</i>-test <i>p</i>-value</b> |

|      |      |        |        |           |                          |
|------|------|--------|--------|-----------|--------------------------|
| 2019 | 2020 | 0.9551 | 0.9817 | 2.7800%   | $5.984 \times 10^{-1}$   |
| 2018 | 2020 | 1.2666 | 0.9817 | −22.4946% | $1.601 \times 10^{-8}$   |
| 2017 | 2020 | 1.5460 | 0.9817 | −36.5021% | $4.735 \times 10^{-29}$  |
| 2016 | 2020 | 2.0616 | 0.9817 | −52.3842% | $2.193 \times 10^{-101}$ |

#### May: May 20–June 30

| Time Period 1 | Time Period 2 | Time Period 1<br>Avg. [BC]<br>( $\mu\text{g}/\text{m}^3$ ) | Time Period 2<br>Avg. [BC]<br>( $\mu\text{g}/\text{m}^3$ ) | % Change Between<br>Years | Two-sided <i>t</i> -test <i>p</i> -value |
|---------------|---------------|------------------------------------------------------------|------------------------------------------------------------|---------------------------|------------------------------------------|
| 2019          | 2020          | 0.9369                                                     | 1.1355                                                     | −17.4914%                 | $2.183 \times 10^{-4}$                   |
| 2018          | 2020          | 1.2413                                                     | 1.1355                                                     | 9.3230%                   | $4.875 \times 10^{-2}$                   |
| 2017          | 2020          | 1.4804                                                     | 1.1355                                                     | 30.3765%                  | $1.389 \times 10^{-10}$                  |
| 2016          | 2020          | 2.8869                                                     | 1.1355                                                     | 154.2513%                 | 0.000                                    |

#### Through June: March 23–June 30

| Time Period 1 | Time Period 2 | Time Period 1<br>Avg. [BC]<br>( $\mu\text{g}/\text{m}^3$ ) | Time Period 2<br>Avg. [BC]<br>( $\mu\text{g}/\text{m}^3$ ) | % Change Between<br>Years | Two-sided <i>t</i> -test <i>p</i> -value |
|---------------|---------------|------------------------------------------------------------|------------------------------------------------------------|---------------------------|------------------------------------------|
| 2019          | 2020          | 0.9570                                                     | 1.0499                                                     | 9.7103%                   | $1.641 \times 10^{-2}$                   |
| 2018          | 2020          | 1.2540                                                     | 1.0499                                                     | −16.2734%                 | $1.372 \times 10^{-7}$                   |
| 2017          | 2020          | 1.5223                                                     | 1.0499                                                     | −31.0306%                 | $3.514 \times 10^{-34}$                  |
| 2016          | 2020          | 2.3943                                                     | 1.0499                                                     | −56.1487%                 | $2.955 \times 10^{-261}$                 |

#### Second Half of Year: July 1–Dec 11

| Time Period 1 | Time Period 2 | Time Period 1<br>Avg. [BC]<br>( $\mu\text{g}/\text{m}^3$ ) | Time Period 2<br>Avg. [BC]<br>( $\mu\text{g}/\text{m}^3$ ) | % Change Between<br>Years | Two-sided <i>t</i> -test <i>p</i> -value |
|---------------|---------------|------------------------------------------------------------|------------------------------------------------------------|---------------------------|------------------------------------------|
| 2019          | 2020          | 1.4881                                                     | 1.6554                                                     | 11.2471%                  | $3.133 \times 10^{-8}$                   |
| 2018          | 2020          | 1.4867                                                     | 1.6554                                                     | 11.3497%                  | $2.417 \times 10^{-8}$                   |
| 2017          | 2020          | 1.8721                                                     | 1.6554                                                     | −11.5727%                 | $7.905 \times 10^{-13}$                  |
| 2016          | 2020          | 2.9693                                                     | 1.6554                                                     | −44.2482%                 | 0.000                                    |

Taft: BC

**Table S16.** Results of interannual *t*-tests for BC concentrations over time periods of interest at the Taft site from 2019 through 2020.

| 2020                     |               |                |                                                            |                                                            |                                     |                                                 |
|--------------------------|---------------|----------------|------------------------------------------------------------|------------------------------------------------------------|-------------------------------------|-------------------------------------------------|
|                          | Time Period 1 | Time Period 2  | Time Period 1<br>Avg. [BC]<br>( $\mu\text{g}/\text{m}^3$ ) | Time Period 2<br>Avg. [BC]<br>( $\mu\text{g}/\text{m}^3$ ) | % Change<br>Between<br>Time Periods | Two-sided<br><i>t</i> -test <i>p</i> -<br>value |
| Beginning of<br>Lockdown | Jan 1–Mar 22  | Mar 23–Apr 10  | 0.430                                                      | 0.468                                                      | 8.831%                              | $1.23 \times 10^{-1}$                           |
| Lockdown                 | Jan 1–Mar 22  | Mar 23–May 1   | 0.430                                                      | 0.339                                                      | −21.061%                            | $1.29 \times 10^{-6}$                           |
| Full Opening             | Jan 1–Mar 22  | Mar 23–May 20  | 0.430                                                      | 0.389                                                      | −9.470%                             | $1.39 \times 10^{-2}$                           |
| May                      | Jan 1–Mar 23  | May 20–June 30 | 0.430                                                      | 0.577                                                      | 34.176%                             | $4.47 \times 10^{-27}$                          |
| June 30                  | Jan 1–Mar 22  | Mar 23–June 30 | 0.430                                                      | 0.470                                                      | 9.303%                              | $5.64 \times 10^{-3}$                           |
| Second Half of Year      | Jan 1–Mar 22  | July 1–Dec 11  | 0.430                                                      | 0.665                                                      | 54.762%                             | $1.69 \times 10^{-71}$                          |



| 2019                     |               |                |                                                            |                                                            |                                     |                                                 |
|--------------------------|---------------|----------------|------------------------------------------------------------|------------------------------------------------------------|-------------------------------------|-------------------------------------------------|
|                          | Time Period 1 | Time Period 2  | Time Period 1<br>Avg. [BC]<br>( $\mu\text{g}/\text{m}^3$ ) | Time Period 2<br>Avg. [BC]<br>( $\mu\text{g}/\text{m}^3$ ) | % Change<br>Between<br>Time Periods | Two-sided<br><i>t</i> -test <i>p</i> -<br>value |
| Beginning of<br>Lockdown | Jan 1–Mar 22  | Mar 23–Apr 10  | 0.404                                                      | 0.543                                                      | 34.343%                             | $1.76 \times 10^{-8}$                           |
| Lockdown                 | Jan 1–Mar 22  | Mar 23–May 1   | 0.404                                                      | 0.456                                                      | 12.713%                             | $5.90 \times 10^{-3}$                           |
| Full Opening             | Jan 1–Mar 22  | Mar 23–May 20  | 0.404                                                      | 0.472                                                      | 16.786%                             | $4.05 \times 10^{-5}$                           |
| May                      | Jan 1–Mar 23  | May 20–June 30 | 0.404                                                      | 0.489                                                      | 20.980%                             | $4.19 \times 10^{-10}$                          |
| June 30                  | Jan 1–Mar 22  | Mar 23–June 30 | 0.404                                                      | 0.482                                                      | 19.195%                             | $7.69 \times 10^{-8}$                           |
| Second Half of Year      | Jan 1–Mar 22  | July 1–Dec 11  | 0.404                                                      | 0.580                                                      | 43.551%                             | $6.19 \times 10^{-41}$                          |

**Table S17.** Results of interannual *t*-tests for BC concentrations over time periods of interest at the Taft site from 2019 through 2020.

| Year 1                                   | Year 2 | Year 1<br>Avg. [BC]<br>( $\mu\text{g}/\text{m}^3$ ) | Year 2<br>Avg. [BC]<br>( $\mu\text{g}/\text{m}^3$ ) | % Change<br>Between<br>Years | Two-sided <i>t</i> -<br>test <i>p</i> -value |
|------------------------------------------|--------|-----------------------------------------------------|-----------------------------------------------------|------------------------------|----------------------------------------------|
| 2019                                     | 2020   | 0.4042                                              | 0.4300                                              | 6.3756%                      | $8.949 \times 10^{-2}$                       |
| Beginning of Lockdown: March 23–April 10 |        |                                                     |                                                     |                              |                                              |
| Year 1                                   | Year 2 | Year 1<br>Avg. [BC]<br>( $\mu\text{g}/\text{m}^3$ ) | Year 2<br>Avg. [BC]<br>( $\mu\text{g}/\text{m}^3$ ) | % Change<br>Between<br>Years | Two-sided <i>t</i> -<br>test <i>p</i> -value |
| 2019                                     | 2020   | 0.5430                                              | 0.4679                                              | −13.8257%                    | $1.660 \times 10^{-2}$                       |
| Lockdown: March 23–May 1                 |        |                                                     |                                                     |                              |                                              |
| Year 1                                   | Year 2 | Year 1<br>Avg. [BC]<br>( $\mu\text{g}/\text{m}^3$ ) | Year 2<br>Avg. [BC]<br>( $\mu\text{g}/\text{m}^3$ ) | % Change<br>Between<br>Years | Two-sided <i>t</i> -<br>test <i>p</i> -value |
| 2019                                     | 2020   | 0.4556                                              | 0.3394                                              | −25.4996%                    | $7.867 \times 10^{-8}$                       |
| Full Opening: March 23–May 20            |        |                                                     |                                                     |                              |                                              |
| Year 1                                   | Year 2 | Year 1<br>Avg. [BC]<br>( $\mu\text{g}/\text{m}^3$ ) | Year 2<br>Avg. [BC]<br>( $\mu\text{g}/\text{m}^3$ ) | % Change<br>Between<br>Years | Two-sided <i>t</i> -<br>test <i>p</i> -value |
| 2019                                     | 2020   | 0.4721                                              | 0.3893                                              | −17.5395%                    | $3.311 \times 10^{-6}$                       |
| May: May 20–June 30                      |        |                                                     |                                                     |                              |                                              |
| Year 1                                   | Year 2 | Year 1<br>Avg. [BC]<br>( $\mu\text{g}/\text{m}^3$ ) | Year 2<br>Avg. [BC]<br>( $\mu\text{g}/\text{m}^3$ ) | % Change<br>Between<br>Years | Two-sided <i>t</i> -<br>test <i>p</i> -value |
| 2019                                     | 2020   | 0.4890                                              | 0.5769                                              | 17.9792%                     | $1.693 \times 10^{-8}$                       |
| Through June: March 23–June 30           |        |                                                     |                                                     |                              |                                              |
| Year 1                                   | Year 2 | Year 1<br>Avg. [BC]<br>( $\mu\text{g}/\text{m}^3$ ) | Year 2<br>Avg. [BC]<br>( $\mu\text{g}/\text{m}^3$ ) | % Change<br>Between<br>Years | Two-sided <i>t</i> -<br>test <i>p</i> -value |

| 2019                               | 2020   | 0.4818                                              | 0.4700                                              | -2.4526%                     | $3.873 \times 10^{-1}$                       |
|------------------------------------|--------|-----------------------------------------------------|-----------------------------------------------------|------------------------------|----------------------------------------------|
| Second Half of Year: July 1–Dec 11 |        |                                                     |                                                     |                              |                                              |
| Year 1                             | Year 2 | Year 1<br>Avg. [BC]<br>( $\mu\text{g}/\text{m}^3$ ) | Year 2<br>Avg. [BC]<br>( $\mu\text{g}/\text{m}^3$ ) | % Change<br>Between<br>Years | Two-sided <i>t</i> -<br>test <i>p</i> -value |
| 2019                               | 2020   | 0.5802                                              | 0.6654                                              | 14.6830%                     | $1.461 \times 10^{-15}$                      |

*CO Near Road***Table S18.** Results of interannual *t*-tests for CO concentrations over time periods of interest at the Near Road site for each year 2016 through 2020.

| 2020                    |               |                |                                     |                                     |                                     |                                                 |
|-------------------------|---------------|----------------|-------------------------------------|-------------------------------------|-------------------------------------|-------------------------------------------------|
| Time Period Description | Time Period 1 | Time Period 2  | Time Period 1<br>Avg. [CO]<br>(ppm) | Time Period 2<br>Avg. [CO]<br>(ppm) | % Change<br>Between<br>Time Periods | Two-sided<br><i>t</i> -test <i>p</i> -<br>value |
| Beginning of Lockdown   | Jan 1–Mar 22  | Mar 23–Apr 10  | 0.3096                              | 0.3099                              | 0.0825%                             | $9.81 \times 10^{-1}$                           |
| Lockdown                | Jan 1–Mar 22  | Mar 23–May 1   | 0.3096                              | 0.2829                              | −8.6460%                            | $1.11 \times 10^{-3}$                           |
| Full Opening            | Jan 1–Mar 22  | Mar 23–May 20  | 0.3096                              | 0.2869                              | −7.3392%                            | $1.78 \times 10^{-3}$                           |
| May                     | Jan 1–Mar 23  | May 20–June 30 | 0.3096                              | 0.2958                              | −4.4748%                            | $7.13 \times 10^{-1}$                           |
| June 30                 | Jan 1–Mar 22  | Mar 23–June 30 | 0.3096                              | 0.3069                              | −0.9017%                            | $2.92 \times 10^{-2}$                           |
| Second Half of Year     | Jan 1–Mar 22  | July 1–Dec 11  | 0.3096                              | 0.4243                              | 37.0188%                            | $1.78 \times 10^{-87}$                          |
| 2019                    |               |                |                                     |                                     |                                     |                                                 |
| Time Period Description | Time Period 1 | Time Period 2  | Time Period 1<br>Avg. [CO]<br>(ppm) | Time Period 2<br>Avg. [CO]<br>(ppm) | % Change<br>Between<br>Time Periods | Two-sided<br><i>t</i> -test <i>p</i> -<br>value |
| Beginning of Lockdown   | Jan 1–Mar 22  | Mar 23–Apr 10  | 0.3948                              | 0.4425                              | 12.0609%                            | $1.10 \times 10^{-5}$                           |
| Lockdown                | Jan 1–Mar 22  | Mar 23–May 1   | 0.3948                              | 0.3751                              | −5.0034%                            | $1.61 \times 10^{-2}$                           |
| Full Opening            | Jan 1–Mar 22  | Mar 23–May 20  | 0.3948                              | 0.3300                              | −16.4127%                           | $5.26 \times 10^{-19}$                          |
| May                     | Jan 1–Mar 23  | May 20–June 30 | 0.3948                              | 0.3061                              | −22.4835%                           | $1.14 \times 10^{-61}$                          |
| June 30                 | Jan 1–Mar 22  | Mar 23–June 30 | 0.3948                              | 0.2685                              | −32.0064%                           | $2.63 \times 10^{-44}$                          |
| Second Half of Year     | Jan 1–Mar 22  | July 1–Dec 11  | 0.3948                              | 0.3776                              | −4.3539%                            | $2.90 \times 10^{-3}$                           |
| 2018                    |               |                |                                     |                                     |                                     |                                                 |
| Time Period Description | Time Period 1 | Time Period 2  | Time Period 1<br>Avg. [CO]<br>(ppm) | Time Period 2<br>Avg. [CO]<br>(ppm) | % Change<br>Between<br>Time Periods | Two-sided<br><i>t</i> -test <i>p</i> -<br>value |
| Beginning of Lockdown   | Jan 1–Mar 22  | Mar 23–Apr 10  | 0.3150                              | 0.3492                              | 10.8777%                            | $1.56 \times 10^{-3}$                           |
| Lockdown                | Jan 1–Mar 22  | Mar 23–May 1   | 0.3150                              | 0.3500                              | 11.1285%                            | $1.97 \times 10^{-5}$                           |
| Full Opening            | Jan 1–Mar 22  | Mar 23–May 20  | 0.3150                              | 0.3457                              | 9.7634%                             | $2.36 \times 10^{-5}$                           |
| May                     | Jan 1–Mar 23  | May 20–June 30 | 0.3150                              | 0.3393                              | 7.7354%                             | $2.59 \times 10^{-2}$                           |
| June 30                 | Jan 1–Mar 22  | Mar 23–June 30 | 0.3150                              | 0.3319                              | 5.3689%                             | $2.48 \times 10^{-18}$                          |
| Second Half of Year     | Jan 1–Mar 22  | July 1–Dec 11  | 0.3150                              | 0.4009                              | 27.2686%                            | $5.34 \times 10^{-50}$                          |

| 2017                    |               |                |                               |                               |                               |                                          |
|-------------------------|---------------|----------------|-------------------------------|-------------------------------|-------------------------------|------------------------------------------|
| Time Period Description | Time Period 1 | Time Period 2  | Time Period 1 Avg. [CO] (ppm) | Time Period 2 Avg. [CO] (ppm) | % Change Between Time Periods | Two-sided <i>t</i> -test <i>p</i> -value |
| Beginning of Lockdown   | Jan 1–Mar 22  | Mar 23–Apr 10  | 0.3381                        | 0.3148                        | −6.8863%                      | $3.16 \times 10^{-2}$                    |
| Lockdown                | Jan 1–Mar 22  | Mar 23–May 1   | 0.3381                        | 0.3363                        | −0.5324%                      | $8.27 \times 10^{-1}$                    |
| Full Opening            | Jan 1–Mar 22  | Mar 23–May 20  | 0.3381                        | 0.3417                        | 1.0826%                       | $6.15 \times 10^{-1}$                    |
| May                     | Jan 1–Mar 23  | May 20–June 30 | 0.3381                        | 0.3278                        | −3.0425%                      | $9.70 \times 10^{-5}$                    |
| June 30                 | Jan 1–Mar 22  | Mar 23–June 30 | 0.3381                        | 0.3085                        | −8.7544%                      | $1.05 \times 10^{-1}$                    |
| Second Half of Year     | Jan 1–Mar 22  | July 1–Dec 11  | 0.3381                        | 0.3804                        | 12.5231%                      | $2.23 \times 10^{-13}$                   |
| 2016                    |               |                |                               |                               |                               |                                          |
| Time Period Description | Time Period 1 | Time Period 2  | Time Period 1 Avg. [CO] (ppm) | Time Period 2 Avg. [CO] (ppm) | % Change Between Time Periods | Two-sided <i>t</i> -test <i>p</i> -value |
| Beginning of Lockdown   | Jan 1–Mar 22  | Mar 23–Apr 10  | 0.3254                        | 0.2703                        | −16.9401%                     | $3.62 \times 10^{-7}$                    |
| Lockdown                | Jan 1–Mar 22  | Mar 23–May 1   | 0.3254                        | 0.3508                        | 7.8126%                       | $1.21 \times 10^{-1}$                    |
| Full Opening            | Jan 1–Mar 22  | Mar 23–May 20  | 0.3254                        | 0.3530                        | 8.4719%                       | $4.08 \times 10^{-2}$                    |
| May                     | Jan 1–Mar 23  | May 20–June 30 | 0.3254                        | 0.3639                        | 11.8189%                      | $1.34 \times 10^{-13}$                   |
| June 30                 | Jan 1–Mar 22  | Mar 23–June 30 | 0.3254                        | 0.3816                        | 17.2836%                      | $5.00 \times 10^{-5}$                    |
| Second Half of Year     | Jan 1–Mar 22  | July 1–Dec 11  | 0.3254                        | 0.4316                        | 32.6309%                      | $7.02 \times 10^{-59}$                   |

**Table S19.** Results of interannual *t*-tests for CO concentrations over time periods of interest at the Near Road site for each year 2016 through 2020.

| Pre COVID: Jan 1–Mar 22                  |        |                        |                        |                        |                                          |
|------------------------------------------|--------|------------------------|------------------------|------------------------|------------------------------------------|
| Year 1                                   | Year 2 | Year 1 Avg. [CO] (ppm) | Year 2 Avg. [CO] (ppm) | % Change Between Years | Two-sided <i>t</i> -test <i>p</i> -value |
| 2019                                     | 2020   | 0.3948                 | 0.3096                 | −21.5758%              | $3.173 \times 10^{-37}$                  |
| 2018                                     | 2020   | 0.3150                 | 0.3096                 | −1.6924%               | $4.247 \times 10^{-1}$                   |
| 2017                                     | 2020   | 0.3381                 | 0.3096                 | −8.4115%               | $2.057 \times 10^{-5}$                   |
| 2016                                     | 2020   | 0.3254                 | 0.3096                 | −4.8390%               | $1.837 \times 10^{-2}$                   |
| Beginning of Lockdown: March 23–April 10 |        |                        |                        |                        |                                          |
| Year 1                                   | Year 2 | Year 1 Avg. [CO] (ppm) | Year 2 Avg. [CO] (ppm) | % Change Between Years | Two-sided <i>t</i> -test <i>p</i> -value |
| 2019                                     | 2020   | 0.4425                 | 0.3099                 | −29.9587%              | $7.221 \times 10^{-22}$                  |
| 2018                                     | 2020   | 0.3492                 | 0.3099                 | −11.2638%              | $4.329 \times 10^{-3}$                   |
| 2017                                     | 2020   | 0.3148                 | 0.3099                 | −1.5569%               | $7.222 \times 10^{-1}$                   |
| 2016                                     | 2020   | 0.2703                 | 0.3099                 | 14.6636%               | $4.047 \times 10^{-3}$                   |
| Lockdown: March 23–May 1                 |        |                        |                        |                        |                                          |
| Year 1                                   | Year 2 | Year 1 Avg. [CO] (ppm) | Year 2 Avg. [CO] (ppm) | % Change Between Years | Two-sided <i>t</i> -test <i>p</i> -value |

|      |      |        |        |           |                         |
|------|------|--------|--------|-----------|-------------------------|
| 2019 | 2020 | 0.3751 | 0.2829 | −24.5829% | $3.023 \times 10^{-22}$ |
| 2018 | 2020 | 0.3500 | 0.2829 | −19.1855% | $1.596 \times 10^{-12}$ |
| 2017 | 2020 | 0.3363 | 0.2829 | −15.8824% | $1.908 \times 10^{-8}$  |
| 2016 | 2020 | 0.3508 | 0.2829 | −19.3662% | $8.782 \times 10^{-13}$ |

  

| Full Opening: March 23–May 20 |        |                              |                              |                           |                                             |
|-------------------------------|--------|------------------------------|------------------------------|---------------------------|---------------------------------------------|
| Year 1                        | Year 2 | Year 1<br>Avg. [CO]<br>(ppm) | Year 2<br>Avg. [CO]<br>(ppm) | % Change<br>Between Years | Two-sided<br><i>t</i> -test <i>p</i> -value |
| 2019                          | 2020   | 0.3300                       | 0.2869                       | −13.0628%                 | $3.598 \times 10^{-8}$                      |
| 2018                          | 2020   | 0.3457                       | 0.2869                       | −17.0101%                 | $5.701 \times 10^{-14}$                     |
| 2017                          | 2020   | 0.3417                       | 0.2869                       | −16.0423%                 | $2.456 \times 10^{-12}$                     |
| 2016                          | 2020   | 0.3530                       | 0.2869                       | −18.7099%                 | $3.228 \times 10^{-17}$                     |

  

| May: May 20–June 30 |        |                              |                              |                           |                                             |
|---------------------|--------|------------------------------|------------------------------|---------------------------|---------------------------------------------|
| Year 1              | Year 2 | Year 1<br>Avg. [CO]<br>(ppm) | Year 2<br>Avg. [CO]<br>(ppm) | % Change<br>Between Years | Two-sided<br><i>t</i> -test <i>p</i> -value |
| 2019                | 2020   | 0.3061                       | 0.2958                       | −3.3562%                  | $1.055 \times 10^{-5}$                      |
| 2018                | 2020   | 0.3393                       | 0.2958                       | −12.8341%                 | $4.063 \times 10^{-3}$                      |
| 2017                | 2020   | 0.3278                       | 0.2958                       | −9.7645%                  | $8.513 \times 10^{-1}$                      |
| 2016                | 2020   | 0.3639                       | 0.2958                       | −18.7054%                 | $1.008 \times 10^{-17}$                     |

  

| Through June: March 23–June 30 |        |                              |                              |                           |                                             |
|--------------------------------|--------|------------------------------|------------------------------|---------------------------|---------------------------------------------|
| Year 1                         | Year 2 | Year 1<br>Avg. [CO]<br>(ppm) | Year 2<br>Avg. [CO]<br>(ppm) | % Change<br>Between Years | Two-sided<br><i>t</i> -test <i>p</i> -value |
| 2019                           | 2020   | 0.2685                       | 0.3069                       | 14.3005%                  | $8.740 \times 10^{-2}$                      |
| 2018                           | 2020   | 0.3319                       | 0.3069                       | −7.5428%                  | $4.315 \times 10^{-13}$                     |
| 2017                           | 2020   | 0.3085                       | 0.3069                       | −0.5293%                  | $1.007 \times 10^{-7}$                      |
| 2016                           | 2020   | 0.3816                       | 0.3069                       | −19.5941%                 | $1.061 \times 10^{-29}$                     |

  

| Second Half of Year: July 1–Dec 11 |        |                              |                              |                           |                                             |
|------------------------------------|--------|------------------------------|------------------------------|---------------------------|---------------------------------------------|
| Year 1                             | Year 2 | Year 1<br>Avg. [CO]<br>(ppm) | Year 2<br>Avg. [CO]<br>(ppm) | % Change<br>Between Years | Two-sided<br><i>t</i> -test <i>p</i> -value |
| 2019                               | 2020   | 0.3776                       | 0.4243                       | 12.3473%                  | $3.076 \times 10^{-23}$                     |
| 2018                               | 2020   | 0.4009                       | 0.4243                       | 5.8390%                   | $6.153 \times 10^{-7}$                      |
| 2017                               | 2020   | 0.3804                       | 0.4243                       | 11.5268%                  | $9.725 \times 10^{-21}$                     |
| 2016                               | 2020   | 0.4316                       | 0.4243                       | −1.6908%                  | $1.200 \times 10^{-1}$                      |

CO Taft

**Table S20.** Results of interannual *t*-tests for CO concentrations over time periods of interest at the Taft site for each year 2016 through 2020.

| 2020          |
|---------------|
| Time Period 2 |

| Time Period Description | Time Period 1 |                | Time Period 1 Avg. [CO] (ppm) | Time Period 2 Avg. [CO] (ppm) | % Change Between Time Periods | Two-sided <i>t</i> -test <i>p</i> -value |
|-------------------------|---------------|----------------|-------------------------------|-------------------------------|-------------------------------|------------------------------------------|
| Beginning of Lockdown   | Jan 1–Mar 22  | Mar 23–Apr 10  | 0.1888                        | 0.2016                        | 6.7857%                       | $3.11 \times 10^{-2}$                    |
| Lockdown                | Jan 1–Mar 22  | Mar 23–May 1   | 0.1888                        | 0.1961                        | 3.8437%                       | $1.07 \times 10^{-1}$                    |
| Full Opening            | Jan 1–Mar 22  | Mar 23–May 20  | 0.1888                        | 0.1921                        | 1.7631%                       | $4.04 \times 10^{-1}$                    |
| May                     | Jan 1–Mar 23  | May 20–June 30 | 0.1888                        | 0.1743                        | −7.6585%                      | $1.61 \times 10^{-4}$                    |
| June 30                 | Jan 1–Mar 22  | Mar 23–June 30 | 0.1888                        | 0.1853                        | −1.8422%                      | $3.18 \times 10^{-1}$                    |
| Second Half of Year     | Jan 1–Mar 22  | July 1–Dec 11  | 0.1888                        | 0.2231                        | 18.1550%                      | $2.86 \times 10^{-27}$                   |

## 2019

| Time Periods Compared   |               |                | Taft                          |                               |                               |                                          |
|-------------------------|---------------|----------------|-------------------------------|-------------------------------|-------------------------------|------------------------------------------|
| Time Period Description | Time Period 1 | Time Period 2  | Time Period 1 Avg. [CO] (ppm) | Time Period 2 Avg. [CO] (ppm) | % Change Between Time Periods | Two-sided <i>t</i> -test <i>p</i> -value |
| Beginning of Lockdown   | Jan 1–Mar 22  | Mar 23–Apr 10  | 0.2041                        | 0.1841                        | −9.7928%                      | $7.719 \times 10^{-4}$                   |
| Lockdown                | Jan 1–Mar 22  | Mar 23–May 1   | 0.2041                        | 0.1690                        | −17.2144%                     | $6.424 \times 10^{-15}$                  |
| Full Opening            | Jan 1–Mar 22  | Mar 23–May 20  | 0.2041                        | 0.1668                        | −18.2727%                     | $9.496 \times 10^{-21}$                  |
| May                     | Jan 1–Mar 23  | May 20–June 30 | 0.2041                        | 0.1403                        | −31.2874%                     | $7.619 \times 10^{-62}$                  |
| June 30                 | Jan 1–Mar 22  | Mar 23–June 30 | 0.2041                        | 0.1564                        | −23.3839%                     | $1.308 \times 10^{-42}$                  |
| Second Half of Year     | Jan 1–Mar 22  | July 1–Dec 11  | 0.2041                        | 0.1833                        | −10.1923%                     | $5.100 \times 10^{-11}$                  |

## 2018

| Time Period Description | Time Period 1 | Time Period 2  | Time Period 1 Avg. [CO] (ppm) | Time Period 2 Avg. [CO] (ppm) | % Change Between Time Periods | Two-sided <i>t</i> -test <i>p</i> -value |
|-------------------------|---------------|----------------|-------------------------------|-------------------------------|-------------------------------|------------------------------------------|
| Beginning of Lockdown   | Jan 1–Mar 22  | Mar 23–Apr 10  | 0.2090                        | 0.1516                        | −27.4589%                     | $4.976 \times 10^{-22}$                  |
| Lockdown                | Jan 1–Mar 22  | Mar 23–May 1   | 0.2090                        | 0.1722                        | −17.5692%                     | $3.815 \times 10^{-16}$                  |
| Full Opening            | Jan 1–Mar 22  | Mar 23–May 20  | 0.2090                        | 0.1890                        | −9.5576%                      | $5.635 \times 10^{-7}$                   |
| May                     | Jan 1–Mar 23  | May 20–June 30 | 0.2090                        | 0.1795                        | −14.1020%                     | $1.530 \times 10^{-14}$                  |
| June 30                 | Jan 1–Mar 22  | Mar 23–June 30 | 0.2090                        | 0.1847                        | −11.6338%                     | $2.328 \times 10^{-8}$                   |
| Second Half of Year     | Jan 1–Mar 22  | July 1–Dec 11  | 0.2090                        | 0.1590                        | −23.8980%                     | $6.889 \times 10^{-56}$                  |

## 2017

| Time Period Description | Time Period 1 | Time Period 2  | Time Period 1 Avg. [CO] (ppm) | Time Period 2 Avg. [CO] (ppm) | % Change Between Time Periods | Two-sided <i>t</i> -test <i>p</i> -value |
|-------------------------|---------------|----------------|-------------------------------|-------------------------------|-------------------------------|------------------------------------------|
| Beginning of Lockdown   | Jan 1–Mar 22  | Mar 23–Apr 10  | 0.1601                        | 0.1213                        | −24.2220%                     | $6.922 \times 10^{-11}$                  |
| Lockdown                | Jan 1–Mar 22  | Mar 23–May 1   | 0.1601                        | 0.1652                        | 3.2124%                       | $2.538 \times 10^{-1}$                   |
| Full Opening            | Jan 1–Mar 22  | Mar 23–May 20  | 0.1601                        | 0.1778                        | 11.0605%                      | $9.161 \times 10^{-6}$                   |
| May                     | Jan 1–Mar 23  | May 20–June 30 | 0.1601                        | 0.1814                        | 13.2869%                      | $2.855 \times 10^{-8}$                   |
| June 30                 | Jan 1–Mar 22  | Mar 23–June 30 | 0.1601                        | 0.1792                        | 11.9340%                      | $4.251 \times 10^{-8}$                   |
| Second Half of Year     | Jan 1–Mar 22  | July 1–Dec 11  | 0.1601                        | 0.2166                        | 35.3212%                      | $4.184 \times 10^{-71}$                  |

## 2016

| Time Period Description | Time Period 1 | Time Period 2  | Time Period 1 Avg. [CO] (ppm) | Time Period 2 Avg. [CO] (ppm) | % Change Between Time Periods | Two-sided <i>t</i> -test <i>p</i> -value |
|-------------------------|---------------|----------------|-------------------------------|-------------------------------|-------------------------------|------------------------------------------|
| Beginning of Lockdown   | Jan 1–Mar 22  | Mar 23–Apr 10  | 0.2605                        | 0.1996                        | −23.3784%                     | $1.297 \times 10^{-24}$                  |
| Lockdown                | Jan 1–Mar 22  | Mar 23–May 1   | 0.2605                        | 0.2369                        | −9.0592%                      | $5.376 \times 10^{-65}$                  |
| Full Opening            | Jan 1–Mar 22  | Mar 23–May 20  | 0.2605                        | 0.2346                        | −9.9586%                      | $1.790 \times 10^{-77}$                  |
| May                     | Jan 1–Mar 23  | May 20–June 30 | 0.2605                        | 0.2353                        | −9.6727%                      | $4.915 \times 10^{-11}$                  |
| June 30                 | Jan 1–Mar 22  | Mar 23–June 30 | 0.2605                        | 0.2348                        | −9.8686%                      | $1.691 \times 10^{-101}$                 |
| Second Half of Year     | Jan 1–Mar 22  | July 1–Dec 11  | 0.2605                        | 0.1839                        | −29.4169%                     | $5.963 \times 10^{-14}$                  |

**Table S21.** Results of interannual *t*-tests for CO concentrations over time periods of interest at the Taft site for each year 2016 through 2020.

| Pre COVID: Jan 1–Mar 22                  |        |                              |                              |                           |                                                 |
|------------------------------------------|--------|------------------------------|------------------------------|---------------------------|-------------------------------------------------|
| Year 1                                   | Year 2 | Year 1<br>Avg. [CO]<br>(ppm) | Year 2<br>Avg. [CO]<br>(ppm) | % Change<br>Between Years | Two-sided<br><i>t</i> -test <i>p</i> -<br>value |
| 2019                                     | 2020   | 0.2041                       | 0.1888                       | −7.5097%                  | $2.876 \times 10^{-5}$                          |
| 2018                                     | 2020   | 0.2090                       | 0.1888                       | −9.6504%                  | $3.743 \times 10^{-8}$                          |
| 2017                                     | 2020   | 0.1601                       | 0.1888                       | 17.9287%                  | $4.842 \times 10^{-15}$                         |
| 2016                                     | 2020   | 0.2605                       | 0.1888                       | −27.5300%                 | $5.102 \times 10^{-85}$                         |
| Beginning of Lockdown: March 23–April 10 |        |                              |                              |                           |                                                 |
| Year 1                                   | Year 2 | Year 1<br>Avg. [CO]<br>(ppm) | Year 2<br>Avg. [CO]<br>(ppm) | % Change<br>Between Years | Two-sided<br><i>t</i> -test <i>p</i> -<br>value |
| 2019                                     | 2020   | 0.1841                       | 0.2016                       | 9.4884%                   | $2.093 \times 10^{-2}$                          |
| 2018                                     | 2020   | 0.1516                       | 0.2016                       | 33.0011%                  | $3.828 \times 10^{-11}$                         |
| 2017                                     | 2020   | 0.1213                       | 0.2016                       | 66.1840%                  | $2.762 \times 10^{-26}$                         |
| 2016                                     | 2020   | 0.1996                       | 0.2016                       | 0.9997%                   | $7.920 \times 10^{-1}$                          |
| Lockdown: March 23–May 1                 |        |                              |                              |                           |                                                 |
| Year 1                                   | Year 2 | Year 1<br>Avg. [CO]<br>(ppm) | Year 2<br>Avg. [CO]<br>(ppm) | % Change<br>Between Years | Two-sided<br><i>t</i> -test <i>p</i> -<br>value |
| 2019                                     | 2020   | 0.1690                       | 0.1961                       | 16.0171%                  | $2.101 \times 10^{-7}$                          |
| 2018                                     | 2020   | 0.1722                       | 0.1961                       | 13.8196%                  | $5.002 \times 10^{-6}$                          |
| 2017                                     | 2020   | 0.1652                       | 0.1961                       | 18.6500%                  | $3.441 \times 10^{-9}$                          |
| 2016                                     | 2020   | 0.2369                       | 0.1961                       | −17.2477%                 | $4.712 \times 10^{-15}$                         |
| Full Opening: March 23–May 20            |        |                              |                              |                           |                                                 |
| Year 1                                   | Year 2 | Year 1<br>Avg. [CO]<br>(ppm) | Year 2<br>Avg. [CO]<br>(ppm) | % Change<br>Between Years | Two-sided<br><i>t</i> -test <i>p</i> -<br>value |
| 2019                                     | 2020   | 0.1668                       | 0.1921                       | 15.1647%                  | $3.827 \times 10^{-9}$                          |
| 2018                                     | 2020   | 0.1890                       | 0.1921                       | 1.6588%                   | $4.653 \times 10^{-1}$                          |
| 2017                                     | 2020   | 0.1778                       | 0.1921                       | 8.0563%                   | $8.496 \times 10^{-4}$                          |
| 2016                                     | 2020   | 0.2346                       | 0.1921                       | −18.0958%                 | $4.967 \times 10^{-23}$                         |

*NO<sub>x</sub> Near Road*

| 2020     |                |                                                                  |                                                                  |                                     |                                                 |
|----------|----------------|------------------------------------------------------------------|------------------------------------------------------------------|-------------------------------------|-------------------------------------------------|
| Period 1 | Time Period 2  | Time Period 1<br>Avg. [NO <sub>x</sub> ]<br>(μg/m <sup>3</sup> ) | Time Period 2<br>Avg. [NO <sub>x</sub> ]<br>(μg/m <sup>3</sup> ) | % Change<br>Between<br>Time Periods | Two-sided<br><i>t</i> -test <i>p</i> -<br>value |
| -Mar 22  | Mar 23–Apr 10  | 48.0957                                                          | 40.4561                                                          | −15.8840%                           | $3.45 \times 10^{-4}$                           |
| -Mar 22  | Mar 23–May 1   | 48.0957                                                          | 34.3302                                                          | −28.6210%                           | $1.84 \times 10^{-17}$                          |
| -Mar 22  | Mar 23–May 20  | 48.0957                                                          | 32.1314                                                          | −33.1928%                           | $8.79 \times 10^{-29}$                          |
| -Mar 23  | May 20–June 30 | 48.0957                                                          | 19.2143                                                          | −60.0499%                           | $4.16 \times 10^{-66}$                          |
| -Mar 22  | Mar 23–June 30 | 48.0957                                                          | 27.0275                                                          | −43.8047%                           | $2.12 \times 10^{-63}$                          |
| -Mar 22  | July 1–Dec 11  | 48.0957                                                          | 50.4609                                                          | 4.9177%                             | $3.76 \times 10^{-2}$                           |
| 2019     |                |                                                                  |                                                                  |                                     |                                                 |
| Period 1 | Time Period 2  | Time Period 1<br>Avg. [NO <sub>x</sub> ]<br>(μg/m <sup>3</sup> ) | Time Period 2<br>Avg. [NO <sub>x</sub> ]<br>(μg/m <sup>3</sup> ) | % Change<br>Between<br>Time Periods | Two-sided<br><i>t</i> -test <i>p</i> -<br>value |
| -Mar 22  | Mar 23–Apr 10  | 46.7922                                                          | 53.5504                                                          | 14.4431%                            | $1.55 \times 10^{-3}$                           |
| -Mar 22  | Mar 23–May 1   | 46.7922                                                          | 37.7396                                                          | −19.3464%                           | $2.23 \times 10^{-8}$                           |
| -Mar 22  | Mar 23–May 20  | 46.7922                                                          | 37.2500                                                          | −20.3927%                           | $2.81 \times 10^{-11}$                          |
| -Mar 23  | May 20–June 30 | 46.7922                                                          | 32.6855                                                          | −30.1475%                           | $3.75 \times 10^{-17}$                          |
| -Mar 22  | Mar 23–June 30 | 46.7922                                                          | 35.4621                                                          | −24.2137%                           | $1.46 \times 10^{-19}$                          |
| -Mar 22  | July 1–Dec 11  | 46.7922                                                          | 42.8526                                                          | −8.4192%                            | $5.33 \times 10^{-4}$                           |
| 2018     |                |                                                                  |                                                                  |                                     |                                                 |

| Time Period Description | Time Period 1 | Time Period 2  | Time Period 1 Avg. [NO <sub>x</sub> ] (µg/m <sup>3</sup> ) | Time Period 2 Avg. [NO <sub>x</sub> ] (µg/m <sup>3</sup> ) | % Change Between Time Periods | Two-sided <i>t</i> -test <i>p</i> -value |
|-------------------------|---------------|----------------|------------------------------------------------------------|------------------------------------------------------------|-------------------------------|------------------------------------------|
| Beginning of Lockdown   | Jan 1–Mar 22  | Mar 23–Apr 10  | 44.8529                                                    | 50.2303                                                    | 11.9889%                      | $1.18 \times 10^{-2}$                    |
| Lockdown                | Jan 1–Mar 22  | Mar 23–May 1   | 44.8529                                                    | 27.2583                                                    | −39.2272%                     | $1.67 \times 10^{-27}$                   |
| Full Opening            | Jan 1–Mar 22  | Mar 23–May 20  | 44.8529                                                    | 30.6264                                                    | −31.7181%                     | $3.37 \times 10^{-23}$                   |
| May                     | Jan 1–Mar 23  | May 20–June 30 | 44.8529                                                    | 16.9980                                                    | −62.1027%                     | $1.16 \times 10^{-61}$                   |
| June 30                 | Jan 1–Mar 22  | Mar 23–June 30 | 44.8529                                                    | 24.7954                                                    | −44.7183%                     | $6.24 \times 10^{-69}$                   |
| Second Half of Year     | Jan 1–Mar 22  | July 1–Dec 11  | 44.8529                                                    | 47.0732                                                    | 4.9502%                       | $5.09 \times 10^{-2}$                    |

  

| 2017                    |               |                |                                                            |                                                            |                               |                                          |
|-------------------------|---------------|----------------|------------------------------------------------------------|------------------------------------------------------------|-------------------------------|------------------------------------------|
| Time Period Description | Time Period 1 | Time Period 2  | Time Period 1 Avg. [NO <sub>x</sub> ] (µg/m <sup>3</sup> ) | Time Period 2 Avg. [NO <sub>x</sub> ] (µg/m <sup>3</sup> ) | % Change Between Time Periods | Two-sided <i>t</i> -test <i>p</i> -value |
| Beginning of Lockdown   | Jan 1–Mar 22  | Mar 23–Apr 10  | 47.6255                                                    | 39.9561                                                    | −16.1035%                     | $3.27 \times 10^{-4}$                    |
| Lockdown                | Jan 1–Mar 22  | Mar 23–May 1   | 47.6255                                                    | 41.6385                                                    | −12.5709%                     | $2.16 \times 10^{-4}$                    |
| Full Opening            | Jan 1–Mar 22  | Mar 23–May 20  | 47.6255                                                    | 42.4583                                                    | −10.8496%                     | $3.12 \times 10^{-4}$                    |
| May                     | Jan 1–Mar 23  | May 20–June 30 | 47.6255                                                    | 42.1756                                                    | −11.4433%                     | $1.13 \times 10^{-3}$                    |
| June 30                 | Jan 1–Mar 22  | Mar 23–June 30 | 47.6255                                                    | 42.4483                                                    | −10.8706%                     | $3.54 \times 10^{-5}$                    |
| Second Half of Year     | Jan 1–Mar 22  | July 1–Dec 11  | 47.6255                                                    | 56.9606                                                    | 19.6011%                      | $2.29 \times 10^{-16}$                   |

  

| 2016                    |               |                |                                                            |                                                            |                               |                                          |
|-------------------------|---------------|----------------|------------------------------------------------------------|------------------------------------------------------------|-------------------------------|------------------------------------------|
| Time Period Description | Time Period 1 | Time Period 2  | Time Period 1 Avg. [NO <sub>x</sub> ] (µg/m <sup>3</sup> ) | Time Period 2 Avg. [NO <sub>x</sub> ] (µg/m <sup>3</sup> ) | % Change Between Time Periods | Two-sided <i>t</i> -test <i>p</i> -value |
| Beginning of Lockdown   | Jan 1–Mar 22  | Mar 23–Apr 10  | 58.6950                                                    | 35.0351                                                    | −40.3099%                     | $1.61 \times 10^{-28}$                   |
| Lockdown                | Jan 1–Mar 22  | Mar 23–May 1   | 58.6950                                                    | 48.8156                                                    | −16.8317%                     | $4.62 \times 10^{-1}$                    |
| Full Opening            | Jan 1–Mar 22  | Mar 23–May 20  | 58.6950                                                    | 51.8764                                                    | −11.6169%                     | $3.02 \times 10^{-3}$                    |
| May                     | Jan 1–Mar 23  | May 20–June 30 | 58.6950                                                    | 52.0526                                                    | −11.3168%                     | $7.23 \times 10^{-5}$                    |
| June 30                 | Jan 1–Mar 22  | Mar 23–June 30 | 58.6950                                                    | 51.6638                                                    | −11.9792%                     | $1.26 \times 10^{-3}$                    |
| Second Half of Year     | Jan 1–Mar 22  | July 1–Dec 11  | 58.6950                                                    | 56.5579                                                    | −3.6409%                      | $4.09 \times 10^{-15}$                   |

**Table S23.** Results of interannual *t*-tests for NO<sub>x</sub> concentrations over time periods of interest at the Near Road site for each year 2016 through 2020.

| Pre COVID: Jan 1–Mar 22 |        |                                      |                                      |                        |                                          |
|-------------------------|--------|--------------------------------------|--------------------------------------|------------------------|------------------------------------------|
| Year 1                  | Year 2 | Year 1 Avg. [NO <sub>x</sub> ] (ppb) | Year 2 Avg. [NO <sub>x</sub> ] (ppb) | % Change Between Years | Two-sided <i>t</i> -test <i>p</i> -value |
| 2019                    | 2020   | 46.7922                              | 48.0957                              | 2.7857%                | $3.219 \times 10^{-1}$                   |
| 2018                    | 2020   | 44.8529                              | 48.0957                              | 7.2299%                | $1.373 \times 10^{-2}$                   |
| 2017                    | 2020   | 47.6255                              | 48.0957                              | 0.9872%                | $7.209 \times 10^{-1}$                   |
| 2016                    | 2020   | 58.6950                              | 48.0957                              | −18.0582%              | $8.115 \times 10^{-16}$                  |

  

| Beginning of Lockdown: March 23–April 10 |  |  |  |  |  |
|------------------------------------------|--|--|--|--|--|
|------------------------------------------|--|--|--|--|--|



| Year 1 | Year 2 | Year 1<br>Avg. [NO <sub>x</sub> ]<br>(ppb) | Year 2<br>Avg. [NO <sub>x</sub> ]<br>(ppb) | % Change<br>Between Years | Two-sided<br><i>t</i> -test <i>p</i> -value |
|--------|--------|--------------------------------------------|--------------------------------------------|---------------------------|---------------------------------------------|
| 2019   | 2020   | 53.5504                                    | 40.4561                                    | −24.4523%                 | $1.443 \times 10^{-6}$                      |
| 2018   | 2020   | 50.2303                                    | 40.4561                                    | −19.4586%                 | $3.217 \times 10^{-4}$                      |
| 2017   | 2020   | 39.9561                                    | 40.4561                                    | 1.2514%                   | $8.540 \times 10^{-1}$                      |
| 2016   | 2020   | 35.0351                                    | 40.4561                                    | 15.4732%                  | $4.602 \times 10^{-2}$                      |

| Lockdown: March 23–May 1 |        |                                            |                                            |                           |                                             |
|--------------------------|--------|--------------------------------------------|--------------------------------------------|---------------------------|---------------------------------------------|
| Year 1                   | Year 2 | Year 1<br>Avg. [NO <sub>x</sub> ]<br>(ppb) | Year 2<br>Avg. [NO <sub>x</sub> ]<br>(ppb) | % Change<br>Between Years | Two-sided<br><i>t</i> -test <i>p</i> -value |
| 2019                     | 2020   | 37.7396                                    | 34.3302                                    | −9.0339%                  | $6.866 \times 10^{-2}$                      |
| 2018                     | 2020   | 27.2583                                    | 34.3302                                    | 25.9439%                  | $1.591 \times 10^{-4}$                      |
| 2017                     | 2020   | 41.6385                                    | 34.3302                                    | −17.5518%                 | $9.516 \times 10^{-5}$                      |
| 2016                     | 2020   | 48.8156                                    | 34.3302                                    | −29.6737%                 | $1.046 \times 10^{-14}$                     |

| Full Opening: March 23–May 20 |        |                                            |                                            |                           |                                             |
|-------------------------------|--------|--------------------------------------------|--------------------------------------------|---------------------------|---------------------------------------------|
| Year 1                        | Year 2 | Year 1<br>Avg. [NO <sub>x</sub> ]<br>(ppb) | Year 2<br>Avg. [NO <sub>x</sub> ]<br>(ppb) | % Change<br>Between Years | Two-sided<br><i>t</i> -test <i>p</i> -value |
| 2019                          | 2020   | 37.2500                                    | 32.1314                                    | −13.7413%                 | $9.012 \times 10^{-4}$                      |
| 2018                          | 2020   | 30.6264                                    | 32.1314                                    | 4.9139%                   | $3.290 \times 10^{-1}$                      |
| 2017                          | 2020   | 42.4583                                    | 32.1314                                    | −24.3226%                 | $2.135 \times 10^{-11}$                     |
| 2016                          | 2020   | 51.8764                                    | 32.1314                                    | −38.0617%                 | $1.709 \times 10^{-37}$                     |

| May: May 20–June 30 |        |                                            |                                            |                           |                                             |
|---------------------|--------|--------------------------------------------|--------------------------------------------|---------------------------|---------------------------------------------|
| Year 1              | Year 2 | Year 1<br>Avg. [NO <sub>x</sub> ]<br>(ppb) | Year 2<br>Avg. [NO <sub>x</sub> ]<br>(ppb) | % Change<br>Between Years | Two-sided<br><i>t</i> -test <i>p</i> -value |
| 2019                | 2020   | 32.6855                                    | 19.2143                                    | 58.7853%                  | $2.397 \times 10^{-12}$                     |
| 2018                | 2020   | 16.9980                                    | 19.2143                                    | 113.0384%                 | $2.485 \times 10^{-1}$                      |
| 2017                | 2020   | 42.1756                                    | 19.2143                                    | 45.5578%                  | $8.447 \times 10^{-33}$                     |
| 2016                | 2020   | 52.0526                                    | 19.2143                                    | 36.9132%                  | $6.203 \times 10^{-65}$                     |

| Through June: March 23–June 30 |        |                                            |                                            |                           |                                             |
|--------------------------------|--------|--------------------------------------------|--------------------------------------------|---------------------------|---------------------------------------------|
| Year 1                         | Year 2 | Year 1<br>Avg. [NO <sub>x</sub> ]<br>(ppb) | Year 2<br>Avg. [NO <sub>x</sub> ]<br>(ppb) | % Change<br>Between Years | Two-sided<br><i>t</i> -test <i>p</i> -value |
| 2019                           | 2020   | 35.4621                                    | 27.0275                                    | −23.7848%                 | $1.077 \times 10^{-12}$                     |
| 2018                           | 2020   | 24.7954                                    | 27.0275                                    | 9.0020%                   | $5.947 \times 10^{-2}$                      |
| 2017                           | 2020   | 42.4483                                    | 27.0275                                    | −36.3285%                 | $1.059 \times 10^{-38}$                     |
| 2016                           | 2020   | 51.6638                                    | 27.0275                                    | −47.6858%                 | $9.570 \times 10^{-96}$                     |

| Second Half of Year: July 1–Dec 11 |  |  |  |  |  |
|------------------------------------|--|--|--|--|--|
|------------------------------------|--|--|--|--|--|



| Time Period Description | Time Period 1 | Time Period 2  | Time Period 1 Avg. [NO <sub>2</sub> ] (ppb) | Time Period 2 Avg. [NO <sub>2</sub> ] (ppb) | % Change Between Time Periods | Two-sided <i>t</i> -test <i>p</i> -value |
|-------------------------|---------------|----------------|---------------------------------------------|---------------------------------------------|-------------------------------|------------------------------------------|
| Beginning of Lockdown   | Jan 1–Mar 22  | Mar 23–Apr 10  | 47.6255                                     | 39.9561                                     | −16.1035%                     | $3.27 \times 10^{-4}$                    |
| Lockdown                | Jan 1–Mar 22  | Mar 23–May 1   | 47.6255                                     | 41.6385                                     | −12.5709%                     | $2.16 \times 10^{-4}$                    |
| Full Opening            | Jan 1–Mar 22  | Mar 23–May 20  | 47.6255                                     | 42.4583                                     | −10.8496%                     | $3.12 \times 10^{-4}$                    |
| June 30                 | Jan 1–Mar 22  | Mar 23–June 30 | 47.6255                                     | 42.4483                                     | −10.8706%                     | $3.54 \times 10^{-5}$                    |
| Second Half of Year     | Jan 1–Mar 22  | July 1–Dec 11  | 47.6255                                     | 56.9606                                     | 19.6011%                      | $2.29 \times 10^{-16}$                   |

| 2016                    |               |                |                                             |                                             |                               |                                          |
|-------------------------|---------------|----------------|---------------------------------------------|---------------------------------------------|-------------------------------|------------------------------------------|
| Time Period Description | Time Period 1 | Time Period 2  | Time Period 1 Avg. [NO <sub>2</sub> ] (ppb) | Time Period 2 Avg. [NO <sub>2</sub> ] (ppb) | % Change Between Time Periods | Two-sided <i>t</i> -test <i>p</i> -value |
| Beginning of Lockdown   | Jan 1–Mar 22  | Mar 23–Apr 10  | 58.6950                                     | 35.0351                                     | −40.3099%                     | $1.61 \times 10^{-28}$                   |
| Lockdown                | Jan 1–Mar 22  | Mar 23–May 1   | 58.6950                                     | 48.8156                                     | −16.8317%                     | $4.62 \times 10^{-1}$                    |
| Full Opening            | Jan 1–Mar 22  | Mar 23–May 20  | 58.6950                                     | 51.8764                                     | −11.6169%                     | $3.02 \times 10^{-3}$                    |
| June 30                 | Jan 1–Mar 22  | Mar 23–June 30 | 58.6950                                     | 51.6638                                     | −11.9792%                     | $1.26 \times 10^{-3}$                    |
| Second Half of Year     | Jan 1–Mar 22  | July 1–Dec 11  | 58.6950                                     | 56.5579                                     | −3.6409%                      | $4.09 \times 10^{-15}$                   |

**Table S25.** Results of interannual *t*-tests for NO<sub>2</sub> concentrations over time periods of interest at the Near Road site for each year 2016 through 2020.

| Pre COVID: Jan 1–Mar 22 |        |                                      |                                      |                        |                                          |
|-------------------------|--------|--------------------------------------|--------------------------------------|------------------------|------------------------------------------|
| Year 1                  | Year 2 | Year 1 Avg. [NO <sub>2</sub> ] (ppb) | Year 2 Avg. [NO <sub>2</sub> ] (ppb) | % Change Between Years | Two-sided <i>t</i> -test <i>p</i> -value |
| 2019                    | 2020   | 46.7922                              | 48.0957                              | 2.7857%                | $3.219 \times 10^{-1}$                   |
| 2018                    | 2020   | 44.8529                              | 48.0957                              | 7.2299%                | $1.373 \times 10^{-2}$                   |
| 2017                    | 2020   | 47.6255                              | 48.0957                              | 0.9872%                | $7.209 \times 10^{-1}$                   |
| 2016                    | 2020   | 58.6950                              | 48.0957                              | −18.0582%              | $8.115 \times 10^{-16}$                  |

  

| Beginning of Lockdown: March 23–April 10 |        |                                      |                                      |                        |                                          |
|------------------------------------------|--------|--------------------------------------|--------------------------------------|------------------------|------------------------------------------|
| Year 1                                   | Year 2 | Year 1 Avg. [NO <sub>2</sub> ] (ppb) | Year 2 Avg. [NO <sub>2</sub> ] (ppb) | % Change Between Years | Two-sided <i>t</i> -test <i>p</i> -value |
| 2019                                     | 2020   | 53.5504                              | 40.4561                              | −24.4523%              | $1.443 \times 10^{-6}$                   |
| 2018                                     | 2020   | 50.2303                              | 40.4561                              | −19.4586%              | $3.217 \times 10^{-4}$                   |
| 2017                                     | 2020   | 39.9561                              | 40.4561                              | 1.2514%                | $8.540 \times 10^{-1}$                   |
| 2016                                     | 2020   | 35.0351                              | 40.4561                              | 15.4732%               | $4.602 \times 10^{-2}$                   |

  

| Lockdown: March 23–May 1 |        |                                      |                                      |                        |                                          |
|--------------------------|--------|--------------------------------------|--------------------------------------|------------------------|------------------------------------------|
| Year 1                   | Year 2 | Year 1 Avg. [NO <sub>2</sub> ] (ppb) | Year 2 Avg. [NO <sub>2</sub> ] (ppb) | % Change Between Years | Two-sided <i>t</i> -test <i>p</i> -value |

|      |      |         |         |           |                         |
|------|------|---------|---------|-----------|-------------------------|
| 2019 | 2020 | 37.7396 | 34.3302 | −9.0339%  | $6.866 \times 10^{-2}$  |
| 2018 | 2020 | 27.2583 | 34.3302 | 25.9439%  | $1.591 \times 10^{-4}$  |
| 2017 | 2020 | 41.6385 | 34.3302 | −17.5518% | $9.516 \times 10^{-5}$  |
| 2016 | 2020 | 48.8156 | 34.3302 | −29.6737% | $1.046 \times 10^{-14}$ |

---

| Full Opening: March 23–May 20 |        |                                            |                                            |                           |                                             |
|-------------------------------|--------|--------------------------------------------|--------------------------------------------|---------------------------|---------------------------------------------|
| Year 1                        | Year 2 | Year 1<br>Avg. [NO <sub>2</sub> ]<br>(ppb) | Year 2<br>Avg. [NO <sub>2</sub> ]<br>(ppb) | % Change<br>Between Years | Two-sided<br><i>t</i> -test <i>p</i> -value |
| 2019                          | 2020   | 37.2500                                    | 32.1314                                    | −13.7413%                 | $9.012 \times 10^{-4}$                      |
| 2018                          | 2020   | 30.6264                                    | 32.1314                                    | 4.9139%                   | $3.290 \times 10^{-1}$                      |
| 2017                          | 2020   | 42.4583                                    | 32.1314                                    | −24.3226%                 | $2.135 \times 10^{-11}$                     |
| 2016                          | 2020   | 51.8764                                    | 32.1314                                    | −38.0617%                 | $1.709 \times 10^{-37}$                     |

---

| Through June: March 23–June 30 |        |                                            |                                            |                           |                                             |
|--------------------------------|--------|--------------------------------------------|--------------------------------------------|---------------------------|---------------------------------------------|
| Year 1                         | Year 2 | Year 1<br>Avg. [NO <sub>2</sub> ]<br>(ppb) | Year 2<br>Avg. [NO <sub>2</sub> ]<br>(ppb) | % Change<br>Between Years | Two-sided<br><i>t</i> -test <i>p</i> -value |
| 2019                           | 2020   | 35.4621                                    | 27.0275                                    | −23.7848%                 | $1.077 \times 10^{-12}$                     |
| 2018                           | 2020   | 24.7954                                    | 27.0275                                    | 9.0020%                   | $5.947 \times 10^{-2}$                      |
| 2017                           | 2020   | 42.4483                                    | 27.0275                                    | −36.3285%                 | $1.059 \times 10^{-38}$                     |
| 2016                           | 2020   | 51.6638                                    | 27.0275                                    | −47.6858%                 | $9.570 \times 10^{-96}$                     |

---

| Second Half of Year: July 1–Dec 11 |        |                                            |                                            |                           |                                             |
|------------------------------------|--------|--------------------------------------------|--------------------------------------------|---------------------------|---------------------------------------------|
| Year 1                             | Year 2 | Year 1<br>Avg. [NO <sub>2</sub> ]<br>(ppb) | Year 2<br>Avg. [NO <sub>2</sub> ]<br>(ppb) | % Change<br>Between Years | Two-sided<br><i>t</i> -test <i>p</i> -value |
| 2019                               | 2020   | 42.8526                                    | 50.4609                                    | 17.7544%                  | $1.960 \times 10^{-16}$                     |
| 2018                               | 2020   | 47.0732                                    | 50.4609                                    | 7.1967%                   | $2.493 \times 10^{-4}$                      |
| 2017                               | 2020   | 56.9606                                    | 50.4609                                    | −11.4109%                 | $2.113 \times 10^{-12}$                     |
| 2016                               | 2020   | 56.5579                                    | 50.4609                                    | −10.7802%                 | $4.350 \times 10^{-11}$                     |

*O*<sub>3</sub> Taft

**Table S26.** Results of interannual *t*-tests for *O*<sub>3</sub> concentrations over time periods of interest at the Taft site for each year 2016 through 2020.

| 2020                    |               |                |                                                  |                                                  |                                     |                                             |
|-------------------------|---------------|----------------|--------------------------------------------------|--------------------------------------------------|-------------------------------------|---------------------------------------------|
| Time Period Description | Time Period 1 | Time Period 2  | Time Period 1<br>Avg. [O <sub>3</sub> ]<br>(ppb) | Time Period 2<br>Avg. [O <sub>3</sub> ]<br>(ppb) | % Change<br>Between<br>Time Periods | Two-sided<br><i>t</i> -test <i>p</i> -value |
| Beginning of Lockdown   | Jan 1–Mar 22  | Mar 23–Apr 10  | 20.4177                                          | 30.9803                                          | 51.7324%                            | $1.63 \times 10^{-48}$                      |
| Lockdown                | Jan 1–Mar 22  | Mar 23–May 1   | 20.4177                                          | 32.7792                                          | 60.5429%                            | $9.61 \times 10^{-113}$                     |
| Full Opening            | Jan 1–Mar 22  | Mar 23–May 20  | 20.4177                                          | 32.4626                                          | 58.9923%                            | $6.49 \times 10^{-136}$                     |
| May                     | Jan 1–Mar 23  | May 20–June 30 | 20.4177                                          | 34.6498                                          | 69.7048%                            | $1.25 \times 10^{-167}$                     |
| June 30                 | Jan 1–Mar 22  | Mar 23–June 30 | 20.4177                                          | 33.3929                                          | 63.5489%                            | $4.04 \times 10^{-205}$                     |
| Second Half of Year     | Jan 1–Mar 22  | July 1–Dec 11  | 20.4177                                          | 25.5229                                          | 25.0037%                            | $2.99 \times 10^{-40}$                      |

| 2019                    |               |                |                                            |                                            |                               |                                          |
|-------------------------|---------------|----------------|--------------------------------------------|--------------------------------------------|-------------------------------|------------------------------------------|
| Time Period Description | Time Period 1 | Time Period 2  | Time Period 1 Avg. [O <sub>3</sub> ] (ppb) | Time Period 2 Avg. [O <sub>3</sub> ] (ppb) | % Change Between Time Periods | Two-sided <i>t</i> -test <i>p</i> -value |
| Beginning of Lockdown   | Jan 1–Mar 22  | Mar 23–Apr 10  | 24.9167                                    | 34.9145                                    | 40.1250%                      | $1.176 \times 10^{-43}$                  |
| Lockdown                | Jan 1–Mar 22  | Mar 23–May 1   | 24.9167                                    | 35.9594                                    | 44.3186%                      | $1.916 \times 10^{-90}$                  |
| Full Opening            | Jan 1–Mar 22  | Mar 23–May 20  | 24.9167                                    | 34.5777                                    | 38.7733%                      | $2.633 \times 10^{-88}$                  |
| May                     | Jan 1–Mar 23  | May 20–June 30 | 24.9167                                    | 32.7411                                    | 31.4023%                      | $6.732 \times 10^{-53}$                  |
| June 30                 | Jan 1–Mar 22  | Mar 23–June 30 | 24.9167                                    | 33.8488                                    | 35.8478%                      | $1.103 \times 10^{-98}$                  |
| Second Half of Year     | Jan 1–Mar 22  | July 1–Dec 11  | 24.9167                                    | 28.7144                                    | 15.2419%                      | $4.925 \times 10^{-23}$                  |
| 2018                    |               |                |                                            |                                            |                               |                                          |
| Time Period Description | Time Period 1 | Time Period 2  | Time Period 1 Avg. [O <sub>3</sub> ] (ppb) | Time Period 2 Avg. [O <sub>3</sub> ] (ppb) | % Change Between Time Periods | Two-sided <i>t</i> -test <i>p</i> -value |
| Beginning of Lockdown   | Jan 1–Mar 22  | Mar 23–Apr 10  | 26.4172                                    | 32.2368                                    | 22.0298%                      | $7.036 \times 10^{-16}$                  |
| Lockdown                | Jan 1–Mar 22  | Mar 23–May 1   | 26.4172                                    | 36.0927                                    | 36.6259%                      | $6.250 \times 10^{-70}$                  |
| Full Opening            | Jan 1–Mar 22  | Mar 23–May 20  | 26.4172                                    | 36.6229                                    | 38.6328%                      | $2.786 \times 10^{-98}$                  |
| May                     | Jan 1–Mar 23  | May 20–June 30 | 26.4172                                    | 36.8770                                    | 39.5947%                      | $1.633 \times 10^{-92}$                  |
| June 30                 | Jan 1–Mar 22  | Mar 23–June 30 | 26.4172                                    | 36.6742                                    | 38.8269%                      | $4.791 \times 10^{-169}$                 |
| Second Half of Year     | Jan 1–Mar 22  | July 1–Dec 11  | 26.4172                                    | 24.0480                                    | −8.9683%                      | $6.956 \times 10^{-10}$                  |
| 2017                    |               |                |                                            |                                            |                               |                                          |
| Time Period Description | Time Period 1 | Time Period 2  | Time Period 1 Avg. [O <sub>3</sub> ] (ppb) | Time Period 2 Avg. [O <sub>3</sub> ] (ppb) | % Change Between Time Periods | Two-sided <i>t</i> -test <i>p</i> -value |
| Beginning of Lockdown   | Jan 1–Mar 22  | Mar 23–Apr 10  | 25.1188                                    | 37.0219                                    | 47.3872%                      | $4.317 \times 10^{-61}$                  |
| Lockdown                | Jan 1–Mar 22  | Mar 23–May 1   | 25.1188                                    | 36.6458                                    | 45.8899%                      | $2.394 \times 10^{-98}$                  |
| Full Opening            | Jan 1–Mar 22  | Mar 23–May 20  | 25.1188                                    | 37.0621                                    | 47.5473%                      | $1.118 \times 10^{-133}$                 |
| May                     | Jan 1–Mar 23  | May 20–June 30 | 25.1188                                    | 37.7312                                    | 50.2106%                      | $8.605 \times 10^{-133}$                 |
| June 30                 | Jan 1–Mar 22  | Mar 23–June 30 | 25.1188                                    | 37.4708                                    | 49.1743%                      | $3.149 \times 10^{-186}$                 |
| Second Half of Year     | Jan 1–Mar 22  | July 1–Dec 11  | 25.1188                                    | 27.1629                                    | 8.1374%                       | $1.032 \times 10^{-7}$                   |
| 2016                    |               |                |                                            |                                            |                               |                                          |
| Time Period Description | Time Period 1 | Time Period 2  | Time Period 1 Avg. [O <sub>3</sub> ] (ppb) | Time Period 2 Avg. [O <sub>3</sub> ] (ppb) | % Change Between Time Periods | Two-sided <i>t</i> -test <i>p</i> -value |
| Beginning of Lockdown   | Jan 1–Mar 22  | Mar 23–Apr 10  | 23.8668                                    | 32.8969                                    | 37.8357%                      | $6.058 \times 10^{-36}$                  |
| Lockdown                | Jan 1–Mar 22  | Mar 23–May 1   | 23.8668                                    | 34.3458                                    | 43.9065%                      | $8.831 \times 10^{-64}$                  |
| Full Opening            | Jan 1–Mar 22  | Mar 23–May 20  | 23.8668                                    | 33.5177                                    | 40.4365%                      | $2.963 \times 10^{-67}$                  |
| May                     | Jan 1–Mar 23  | May 20–June 30 | 23.8668                                    | 41.5060                                    | 73.9069%                      | $5.644 \times 10^{-253}$                 |
| June 30                 | Jan 1–Mar 22  | Mar 23–June 30 | 23.8668                                    | 36.8483                                    | 54.3918%                      | $2.946 \times 10^{-168}$                 |
| Second Half of Year     | Jan 1–Mar 22  | July 1–Dec 11  | 23.8668                                    | 26.1756                                    | 9.6737%                       | $5.939 \times 10^{-3}$                   |

**Table S27.** Results of interannual *t*-tests for O<sub>3</sub> concentrations over time periods of interest at the Taft site for each year 2016 through 2020.

| Pre COVID: Jan 1–Mar 22                  |        |                                        |                                        |                           |                                             |
|------------------------------------------|--------|----------------------------------------|----------------------------------------|---------------------------|---------------------------------------------|
| Year 1                                   | Year 2 | Year 1<br>Avg. [O <sub>3</sub> ] (ppb) | Year 2<br>Avg. [O <sub>3</sub> ] (ppb) | % Change<br>Between Years | Two-sided<br><i>t</i> -test <i>p</i> -value |
| 2019                                     | 2020   | 24.9167                                | 20.4177                                | −18.0561%                 | $4.571 \times 10^{-24}$                     |
| 2018                                     | 2020   | 26.4172                                | 20.4177                                | −22.7105%                 | $1.828 \times 10^{-41}$                     |
| 2017                                     | 2020   | 25.1188                                | 20.4177                                | −18.7156%                 | $3.985 \times 10^{-26}$                     |
| 2016                                     | 2020   | 23.8668                                | 20.4177                                | −14.4514%                 | $8.579 \times 10^{-15}$                     |
| Beginning of Lockdown: March 23–April 10 |        |                                        |                                        |                           |                                             |
| Year 1                                   | Year 2 | Year 1<br>Avg. [O <sub>3</sub> ] (ppb) | Year 2<br>Avg. [O <sub>3</sub> ] (ppb) | % Change<br>Between Years | Two-sided<br><i>t</i> -test <i>p</i> -value |
| 2019                                     | 2020   | 34.9145                                | 30.9803                                | −11.2681%                 | $1.810 \times 10^{-5}$                      |
| 2018                                     | 2020   | 32.2368                                | 30.9803                                | −3.8980%                  | $1.709 \times 10^{-1}$                      |
| 2017                                     | 2020   | 37.0219                                | 30.9803                                | −16.3192%                 | $4.616 \times 10^{-11}$                     |
| 2016                                     | 2020   | 32.8969                                | 30.9803                                | −5.8263%                  | $3.673 \times 10^{-2}$                      |
| Lockdown: March 23–May 1                 |        |                                        |                                        |                           |                                             |
| Year 1                                   | Year 2 | Year 1<br>Avg. [O <sub>3</sub> ] (ppb) | Year 2<br>Avg. [O <sub>3</sub> ] (ppb) | % Change<br>Between Years | Two-sided<br><i>t</i> -test <i>p</i> -value |
| 2019                                     | 2020   | 35.9594                                | 32.7792                                | −8.8439%                  | $4.955 \times 10^{-7}$                      |
| 2018                                     | 2020   | 36.0927                                | 32.7792                                | −9.1806%                  | $1.616 \times 10^{-7}$                      |
| 2017                                     | 2020   | 36.6458                                | 32.7792                                | −10.5514%                 | $9.776 \times 10^{-10}$                     |
| 2016                                     | 2020   | 34.3458                                | 32.7792                                | −4.5614%                  | $1.324 \times 10^{-2}$                      |
| Full Opening: March 23–May 20            |        |                                        |                                        |                           |                                             |
| Year 1                                   | Year 2 | Year 1<br>Avg. [O <sub>3</sub> ] (ppb) | Year 2<br>Avg. [O <sub>3</sub> ] (ppb) | % Change<br>Between Years | Two-sided<br><i>t</i> -test <i>p</i> -value |
| 2019                                     | 2020   | 34.5777                                | 32.4626                                | −6.1170%                  | $4.875 \times 10^{-5}$                      |
| 2018                                     | 2020   | 36.6229                                | 32.4626                                | −11.3599%                 | $1.381 \times 10^{-15}$                     |
| 2017                                     | 2020   | 37.0621                                | 32.4626                                | −12.4104%                 | $1.048 \times 10^{-18}$                     |
| 2016                                     | 2020   | 33.5177                                | 32.4626                                | −3.1478%                  | $4.275 \times 10^{-2}$                      |
| May: May 20–June 30                      |        |                                        |                                        |                           |                                             |
| Year 1                                   | Year 2 | Year 1<br>Avg. [O <sub>3</sub> ] (ppb) | Year 2<br>Avg. [O <sub>3</sub> ] (ppb) | % Change<br>Between Years | Two-sided<br><i>t</i> -test <i>p</i> -value |
| 2019                                     | 2020   | 32.7411                                | 34.6498                                | 5.8298%                   | $1.089 \times 10^{-3}$                      |
| 2018                                     | 2020   | 36.8770                                | 34.6498                                | −6.0395%                  | $1.384 \times 10^{-4}$                      |
| 2017                                     | 2020   | 37.7312                                | 34.6498                                | −8.1666%                  | $1.353 \times 10^{-7}$                      |
| 2016                                     | 2020   | 41.5060                                | 34.6498                                | −16.5185%                 | $1.165 \times 10^{-31}$                     |
| Through June: March 23–June 30           |        |                                        |                                        |                           |                                             |
| Year 1                                   | Year 2 | Year 1<br>Avg. [O <sub>3</sub> ] (ppb) | Year 2<br>Avg. [O <sub>3</sub> ] (ppb) | % Change<br>Between Years | Two-sided<br><i>t</i> -test <i>p</i> -value |
| 2019                                     | 2020   | 33.8488                                | 33.3929                                | −1.3467%                  | $2.544 \times 10^{-1}$                      |

|      |      |         |         |           |                         |
|------|------|---------|---------|-----------|-------------------------|
| 2018 | 2020 | 36.6742 | 33.3929 | −8.9470%  | $2.383 \times 10^{-16}$ |
| 2017 | 2020 | 37.4708 | 33.3929 | −10.8829% | $2.185 \times 10^{-24}$ |
| 2016 | 2020 | 36.8483 | 33.3929 | −9.3774%  | $5.817 \times 10^{-18}$ |

| Second Half of Year: July 1–Dec 11 |        |                                        |                                        |                           |                                             |
|------------------------------------|--------|----------------------------------------|----------------------------------------|---------------------------|---------------------------------------------|
| Year 1                             | Year 2 | Year 1<br>Avg. [O <sub>3</sub> ] (ppb) | Year 2<br>Avg. [O <sub>3</sub> ] (ppb) | % Change<br>Between Years | Two-sided<br><i>t</i> -test <i>p</i> -value |
| 2019                               | 2020   | 28.7144                                | 25.5229                                | −11.1148%                 | $1.721 \times 10^{-24}$                     |
| 2018                               | 2020   | 24.0480                                | 25.5229                                | 6.1329%                   | $2.340 \times 10^{-6}$                      |
| 2017                               | 2020   | 27.1629                                | 25.5229                                | −6.0376%                  | $1.520 \times 10^{-7}$                      |
| 2016                               | 2020   | 26.1756                                | 25.5229                                | −2.4935%                  | $3.664 \times 10^{-2}$                      |

### Meteorological Data Summary

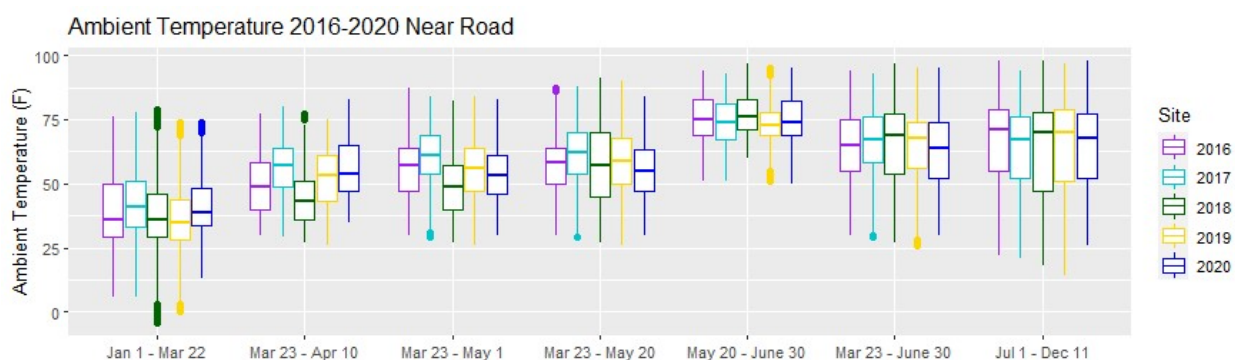

**Figure S5.** Boxplots of ambient temperature at the Near Road site during each time period of interest 2016 through 2020.

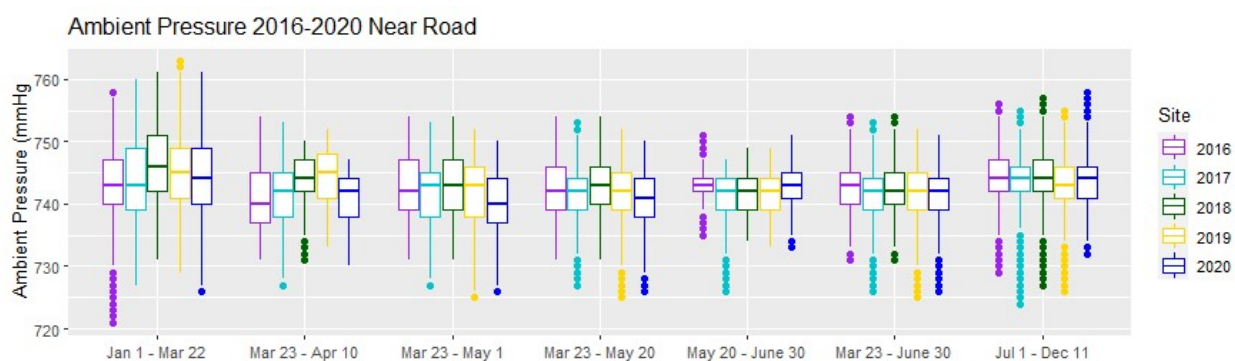

**Figure S6.** Boxplots of ambient pressure at the Near Road site during each time period of interest 2016 through 2020.

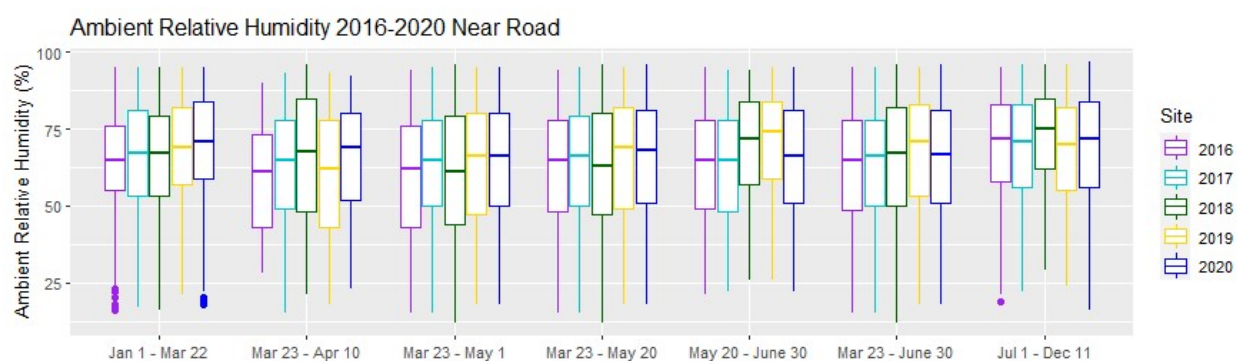

**Figure S7.** Boxplots of ambient relative humidity at the Near Road site during each time period of interest 2016 through 2020.

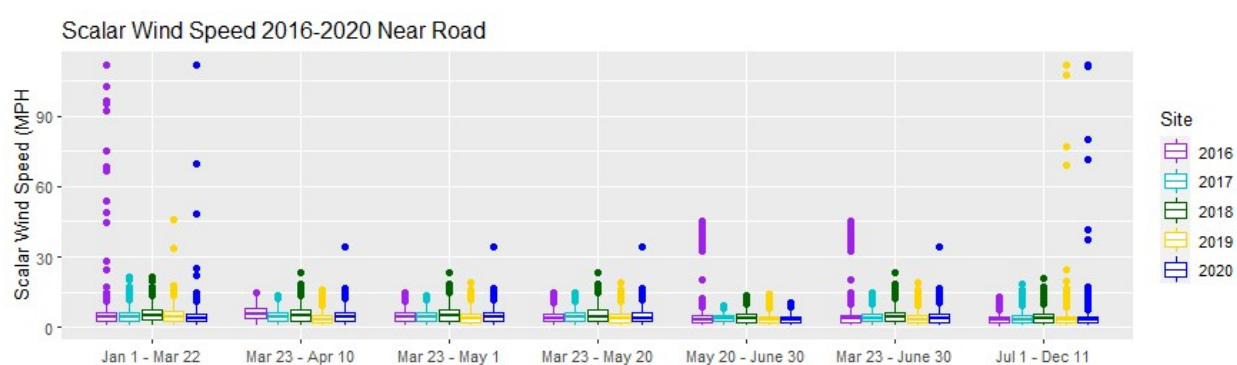

**Figure S8.** Boxplots of scalar wind speed at the Near Road site during each time period of interest 2016 through 2020.

**Table S28.** Mean and standard deviation of meteorological terms analyzed at the Near Road site during each time period of interest 2016 through 2020.

| Time Period     | Year | Ambient Temperature (°F) | Ambient Pressure (mmHg) | Ambient Relative Humidity (%) | Scalar Wind Speed (mph) |
|-----------------|------|--------------------------|-------------------------|-------------------------------|-------------------------|
| Jan 1–Mar 22    | 2016 | 38.771 (11.278)          | 742.99 (5.705)          | 64.754 (15.798)               | 5.842 (11.278)          |
|                 | 2017 | 41.578 (2.756)           | 743.631 (6.622)         | 65.71 (17.986)                | 4.811 (2.756)           |
|                 | 2018 | 36.407 (2.971)           | 745.963 (6.141)         | 65.312 (17.274)               | 5.369 (2.971)           |
|                 | 2019 | 35.954 (3.215)           | 744.74 (5.74)           | 67.904 (16.629)               | 5.055 (3.215)           |
|                 | 2020 | 40.533 (4.621)           | 744.593 (6.442)         | 69.371 (17.252)               | 4.512 (4.621)           |
| Mar 23–April 10 | 2016 | 49.612 (3.138)           | 741.007 (5.457)         | 59.263 (16.663)               | 6.046 (3.138)           |
|                 | 2017 | 56.906 (2.718)           | 740.855 (5.715)         | 62.607 (19.791)               | 5.085 (2.718)           |
|                 | 2018 | 44.004 (3.452)           | 743.901 (4.056)         | 65.708 (20.861)               | 5.505 (3.452)           |
|                 | 2019 | 51.689 (2.668)           | 744.741 (4.389)         | 59.686 (21.061)               | 3.894 (2.668)           |
|                 | 2020 | 55.728 (3.06)            | 740.607 (3.667)         | 65.526 (17.547)               | 4.755 (3.06)            |
| Mar 23–May 1    | 2016 | 56.33 (2.795)            | 742.49 (5.12)           | 60.205 (19.499)               | 4.821 (2.795)           |
|                 | 2017 | 61.302 (2.55)            | 741.67 (5.39)           | 62.855 (18.657)               | 4.856 (2.55)            |
|                 | 2018 | 49.7 (3.452)             | 743.145 (4.868)         | 60.129 (21.602)               | 5.611 (3.452)           |
|                 | 2019 | 55.769 (2.816)           | 742.117 (5.489)         | 63.138 (19.949)               | 4.378 (2.816)           |
|                 | 2020 | 53.848 (2.909)           | 740.165 (4.404)         | 63.89 (19.375)                | 4.707 (2.909)           |
| Mar 23–May 20   | 2016 | 57.143 (2.597)           | 742.406 (4.661)         | 62.892 (19.11)                | 4.396 (2.597)           |
|                 | 2017 | 62.064 (2.483)           | 741.14 (4.939)          | 63.84 (18.713)                | 4.656 (2.483)           |
|                 | 2018 | 57.155 (3.313)           | 742.908 (4.171)         | 62.277 (20.404)               | 5.342 (3.313)           |



|                    |                      |                |                 |                 |               |
|--------------------|----------------------|----------------|-----------------|-----------------|---------------|
| May 20–<br>June 30 | 2019                 | 58.869 (2.643) | 741.952 (4.807) | 65.188 (19.707) | 4.197 (2.643) |
|                    | 2020                 | 55.207 (2.802) | 740.872 (4.26)  | 65.163 (19.51)  | 4.53 (2.802)  |
|                    | 2016                 | 75.407 (5.635) | 742.784 (2.859) | 62.821 (17.977) | 4.487 (5.635) |
|                    | 2017                 | 73.441 (1.656) | 741.103 (3.85)  | 63.563 (18.157) | 3.709 (1.656) |
|                    | 2018                 | 76.917 (2.333) | 741.524 (2.841) | 69.348 (16.455) | 4.174 (2.333) |
|                    | 2019                 | 73.432 (2.097) | 741.673 (3.336) | 70.699 (16.659) | 3.656 (2.097) |
| Mar 23–<br>June 30 | 2020                 | 74.463 (1.924) | 742.872 (3.449) | 65.109 (18.603) | 3.569 (1.924) |
|                    | 2016                 | 64.776 (4.157) | 742.547 (4.029) | 62.793 (18.661) | 4.447 (4.157) |
|                    | 2017                 | 66.77 (2.232)  | 741.098 (4.531) | 63.522 (18.439) | 4.268 (2.232) |
|                    | 2018                 | 65.266 (3.002) | 742.312 (3.75)  | 65.15 (19.191)  | 4.873 (3.002) |
|                    | 2019                 | 65.117 (2.434) | 741.825 (4.259) | 67.549 (18.685) | 3.948 (2.434) |
|                    | 2020                 | 63.29 (2.528)  | 741.685 (4.079) | 64.989 (19.16)  | 4.127 (2.528) |
| June 30–<br>Dec 11 | 2016                 | 66.684 (1.789) | 744.622 (3.651) | 69.781 (15.138) | 3.317 (1.789) |
|                    | 2017                 | 63.726 (2.315) | 743.91 (3.749)  | 68.944 (16.148) | 3.728 (2.315) |
|                    | 2018                 | 63.626 (2.395) | 744.069 (4.194) | 72.199 (15.338) | 4.142 (2.395) |
|                    | 2019                 | 65.288 (4.314) | 743.345 (3.96)  | 67.729 (16.494) | 3.637 (4.314) |
|                    | 2020                 | 64.989 (4.69)  | 743.72 (3.768)  | 69.008 (17.121) | 3.603 (4.69)  |
|                    | <b>Year Averages</b> |                |                 |                 |               |
| 2016               |                      | 58.389 (4.484) | 742.692 (4.497) | 63.216 (17.55)  | 4.765 (4.484) |
| 2017               |                      | 60.827 (2.387) | 741.915 (4.971) | 64.434 (18.27)  | 4.445 (2.387) |
| 2018               |                      | 56.153 (2.988) | 743.403 (4.289) | 65.732 (18.732) | 5.002 (2.988) |
| 2019               |                      | 58.017 (2.884) | 742.913 (4.569) | 65.985 (18.455) | 4.109 (2.884) |
| 2020               |                      | 58.294 (3.219) | 742.073 (4.296) | 66.151 (18.367) | 4.258 (3.219) |

**Table S29.** Median of meteorological terms analyzed at the Near Road site during each time period of interest 2016 through 2020.

| Time Period     | Year | Ambient Temperature (°F) | Ambient Pressure (mmHg) | Ambient Relative Humidity (%) | Scalar Wind Speed (mph) |
|-----------------|------|--------------------------|-------------------------|-------------------------------|-------------------------|
| Jan 1–Mar 22    | 2016 | 36.000                   | 743.000                 | 65.000                        | 4.200                   |
|                 | 2017 | 41.000                   | 743.000                 | 67.000                        | 4.300                   |
|                 | 2018 | 36.000                   | 746.000                 | 67.000                        | 4.800                   |
|                 | 2019 | 35.000                   | 745.000                 | 69.000                        | 4.300                   |
|                 | 2020 | 39.000                   | 744.000                 | 71.000                        | 3.900                   |
| Mar 23–April 10 | 2016 | 49.000                   | 740.000                 | 61.000                        | 5.550                   |
|                 | 2017 | 57.000                   | 742.000                 | 65.000                        | 4.700                   |
|                 | 2018 | 43.000                   | 744.000                 | 67.500                        | 5.000                   |
|                 | 2019 | 53.000                   | 745.000                 | 62.000                        | 3.100                   |
|                 | 2020 | 54.000                   | 742.000                 | 69.000                        | 4.400                   |
| Mar 23–May 1    | 2016 | 57.000                   | 742.000                 | 62.000                        | 4.200                   |
|                 | 2017 | 61.000                   | 743.000                 | 65.000                        | 4.600                   |
|                 | 2018 | 49.000                   | 743.000                 | 61.000                        | 5.000                   |
|                 | 2019 | 56.000                   | 743.000                 | 66.000                        | 3.700                   |
|                 | 2020 | 53.000                   | 740.000                 | 66.000                        | 4.300                   |
| Mar 23–May 20   | 2016 | 58.000                   | 742.000                 | 65.000                        | 3.800                   |
|                 | 2017 | 62.000                   | 742.000                 | 66.000                        | 4.300                   |
|                 | 2018 | 57.000                   | 743.000                 | 63.000                        | 4.700                   |
|                 | 2019 | 59.000                   | 742.000                 | 69.000                        | 3.600                   |
|                 | 2020 | 55.000                   | 741.000                 | 68.000                        | 4.100                   |
| 2016            |      | 75.000                   | 743.000                 | 65.000                        | 3.300                   |

|                |      |         |          |         |        |
|----------------|------|---------|----------|---------|--------|
| May 20–June 30 | 2017 | 74.000  | 742.000  | 65.000  | 3.600  |
|                | 2018 | 76.000  | 742.000  | 72.000  | 3.700  |
|                | 2019 | 73.000  | 742.000  | 74.000  | 3.400  |
|                | 2020 | 74.000  | 743.000  | 66.000  | 3.200  |
| Mar 23–June 30 | 2016 | 65.000  | 743.000  | 65.000  | 3.600  |
|                | 2017 | 67.000  | 742.000  | 66.000  | 4.000  |
|                | 2018 | 69.000  | 742.000  | 67.000  | 4.200  |
|                | 2019 | 68.000  | 742.000  | 71.000  | 3.400  |
|                | 2020 | 64.000  | 742.000  | 66.500  | 3.700  |
| June 30–Dec 11 | 2016 | 71.000  | 744.000  | 72.000  | 3.000  |
|                | 2017 | 67.000  | 744.000  | 71.000  | 3.100  |
|                | 2018 | 70.000  | 744.000  | 75.000  | 3.600  |
|                | 2019 | 70.000  | 743.000  | 70.000  | 3.000  |
|                | 2020 | 68.000  | 744.000  | 72.000  | 3.000  |
| Year Averages  |      |         |          |         |        |
|                | 2016 | 58.7143 | 742.4286 | 65.0000 | 3.9500 |
|                | 2017 | 61.2857 | 742.5714 | 66.4286 | 4.0857 |
|                | 2018 | 57.1429 | 743.4286 | 67.5000 | 4.4286 |
|                | 2019 | 59.1429 | 743.1429 | 68.7143 | 3.5000 |
|                | 2020 | 58.1429 | 742.2857 | 68.3571 | 3.8000 |

**Table S30.** Median of meteorological terms analyzed at the Near Road site during each time period of interest 2016 through 2020.

| Time Period     | Year | Ambient Temperature (°F) | Ambient Pressure (mmHg) | Ambient Relative Humidity (%) | Scalar Wind Speed (mph) |
|-----------------|------|--------------------------|-------------------------|-------------------------------|-------------------------|
| Jan 1–Mar 22    | 2016 | 6–76                     | 721–758                 | 16–95                         | 0.5–111.8               |
|                 | 2017 | 6–78                     | 727–760                 | 17–95                         | 0.8–21.8                |
|                 | 2018 | −4–79                    | 731–761                 | 16–95                         | 0.7–21.8                |
|                 | 2019 | 0–74                     | 729–763                 | 21–95                         | 0.6–45.8                |
|                 | 2020 | 13–74                    | 726–761                 | 18–95                         | 0.5–111.8               |
| Mar 23–April 10 | 2016 | 30–77                    | 731–754                 | 28–90                         | 0.7–14.8                |
|                 | 2017 | 29–80                    | 727–753                 | 15–93                         | 0.5–13.4                |
|                 | 2018 | 27–77                    | 731–750                 | 21–96                         | 0.7–23.4                |
|                 | 2019 | 26–75                    | 733–752                 | 18–93                         | 0.6–15.9                |
|                 | 2020 | 35–83                    | 730–747                 | 23–92                         | 0.6–34.5                |
| Mar 23–May 1    | 2016 | 30–87                    | 731–754                 | 15–94                         | 0.7–14.8                |
|                 | 2017 | 29–84                    | 727–753                 | 15–95                         | 0.5–13.4                |
|                 | 2018 | 27–82                    | 731–754                 | 12–96                         | 0.7–23.4                |
|                 | 2019 | 26–84                    | 725–752                 | 18–95                         | 0.6–19.3                |
|                 | 2020 | 30–83                    | 726–750                 | 18–95                         | 0.6–34.5                |
| Mar 23–May 20   | 2016 | 30–87                    | 731–754                 | 15–94                         | 0.7–14.8                |
|                 | 2017 | 29–88                    | 727–753                 | 15–95                         | 0.5–14.6                |
|                 | 2018 | 27–91                    | 731–754                 | 12–96                         | 0.7–23.4                |
|                 | 2019 | 26–90                    | 725–752                 | 18–95                         | 0.6–19.3                |
|                 | 2020 | 30–84                    | 726–750                 | 18–96                         | 0.6–34.5                |
| May 20–June 30  | 2016 | 51–94                    | 735–751                 | 21–95                         | 0.6–45.4                |
|                 | 2017 | 51–93                    | 726–747                 | 22–94                         | 0.6–9.4                 |
|                 | 2018 | 60–97                    | 734–749                 | 26–94                         | 0.9–13.5                |
|                 | 2019 | 51–95                    | 733–749                 | 26–95                         | 0.7–14.1                |
|                 | 2020 | 50–95                    | 733–751                 | 22–95                         | 0.6–10.8                |

|                            |               |                 |               |              |           |
|----------------------------|---------------|-----------------|---------------|--------------|-----------|
| <b>Mar 23–<br/>June 30</b> | <b>2016</b>   | 30–94           | 731–754       | 15–95        | 0.6–45.4  |
|                            | <b>2017</b>   | 29–93           | 726–753       | 15–95        | 0.5–14.6  |
|                            | <b>2018</b>   | 27–97           | 731–754       | 12–96        | 0.7–23.4  |
|                            | <b>2019</b>   | 26–95           | 725–752       | 18–95        | 0.6–19.3  |
|                            | <b>2020</b>   | 30–95           | 726–751       | 18–96        | 0.6–34.5  |
| <b>June 30–<br/>Dec 11</b> | <b>2016</b>   | 22–98           | 729–756       | 19–95        | 0.4–13    |
|                            | <b>2017</b>   | 21–94           | 724–755       | 22–96        | 0.5–18.4  |
|                            | <b>2018</b>   | 18–98           | 727–757       | 29–96        | 0.8–20.7  |
|                            | <b>2019</b>   | 14–97           | 726–755       | 24–96        | 0.6–111.8 |
|                            | <b>2020</b>   | 26–98           | 732–758       | 16–97        | 0.7–111.9 |
| <b>Year Averages</b>       |               |                 |               |              |           |
| <b>2016</b>                | 28.429–87.571 | 729.857–754.429 | 18.429–94     | 0.6–37.143   |           |
| <b>2017</b>                | 27.714–87.143 | 726.286–753.429 | 17.286–94.714 | 0.557–15.086 |           |
| <b>2018</b>                | 26–88.714     | 730.857–754.143 | 18.286–95.571 | 0.743–21.371 |           |
| <b>2019</b>                | 24.143–87.143 | 728–753.571     | 20.429–94.857 | 0.614–35.071 |           |
| <b>2020</b>                | 30.571–87.429 | 728.429–752.571 | 19–95.143     | 0.6–53.214   |           |

### Tukey Test Difference and 95% Confidence Intervals

**Table S31.** Difference in intra-annual 2020 PM<sub>2.5</sub> concentrations (µg/m<sup>3</sup>), as well as 95% confidence interval of each indicated time period at Near Road.

|                       | Jan 1–Mar 22            | Mar 23–Apr 10           | Mar 23–May 1           | Mar 23–May 20     | May 20–June 30         | Mar 23–June 30   |
|-----------------------|-------------------------|-------------------------|------------------------|-------------------|------------------------|------------------|
| <b>Mar 23–Apr 10</b>  | −0.13 (−0.22–<br>−2.99) | -                       | -                      | -                 | -                      | -                |
| <b>Mar 23–May 1</b>   | 0.06 (−1.02–1.08)       | −0.19 (−3.15–<br>−0.12) | -                      | -                 | -                      | -                |
| <b>Mar 23–May 20</b>  | 0.08 (−0.62–1.25)       | −0.21 (−3.36–<br>−0.49) | −0.01 (−1.41–<br>0.83) | -                 | -                      | -                |
| <b>May 20–June 30</b> | −0.08 (−1.22–<br>0.86)  | −0.05 (−2.93–<br>0.08)  | 0.14 (−0.99–1.41)      | 0.15 (1.6–−0.6)   | -                      | -                |
| <b>Mar 23–June 30</b> | 0.01 (−0.76–0.87)       | −0.14 (−3.02–<br>−0.3)  | 0.05 (−0.63–0.99)      | 0.07 (−1.04–1.17) | −0.07 (−1.16–<br>0.63) | -                |
| <b>July 1–Dec 11</b>  | −0.6 (−2.13–<br>−0.66)  | 0.47 (−1.52–1.11)       | 0.06 (0.97–2.88)       | 0.67 (0.89–2.54)  | 0.52 (0.28–2.16)       | 0.61 (0.76–2.14) |

**Table S32.** Difference in interannual PM<sub>2.5</sub> concentrations (µg/m<sup>3</sup>) 2017–2019 compared to 2020, as well as 95% confidence interval of each indicated time period at Near Road.

|                       | 2019                | 2018                | 2017                |
|-----------------------|---------------------|---------------------|---------------------|
| <b>Jan 1–Mar 22</b>   | −2.12 (−2.98–−1.26) | 1.03 (0.18–1.89)    | 0.04 (−0.81–0.9)    |
| <b>Mar 23–Apr 10</b>  | −1.01 (−2.78–0.76)  | 3.15 (1.38–4.91)    | 2.41 (0.64–4.18)    |
| <b>Mar 23–May 1</b>   | −1.28 (−2.5–−0.06)  | 0.7 (−0.66–2.05)    | −0.27 (−1.49–0.95)  |
| <b>Mar 23–May 20</b>  | −1.46 (−2.5–−0.42)  | −2.41 (−3.48–−1.33) | −0.81 (−1.82–0.2)   |
| <b>May 20–June 30</b> | −0.11 (−1.3–1.08)   | −2.59 (−3.78–−1.39) | 0.49 (−0.7–1.69)    |
| <b>Mar 23–June 30</b> | −0.86 (−1.64–−0.07) | −2.44 (−3.24–−1.64) | −0.19 (−0.96–0.58)  |
| <b>July 1–Dec 11</b>  | −0.5 (−1.1–0.1)     | −1.94 (−2.57–−1.3)  | −1.11 (−1.71–−0.52) |

**Table S33.** Difference in intra-annual 2020 PM<sub>2.5</sub> concentrations (µg/m<sup>3</sup>), as well as 95% confidence interval of each indicated time period at Taft.

|                       | Jan 1–Mar 22            | Mar 23–Apr 10           | Mar 23–May 1           | Mar 23–May 20    | May 20–June 30    | Mar 23–June 30    |
|-----------------------|-------------------------|-------------------------|------------------------|------------------|-------------------|-------------------|
| <b>Mar 23–Apr 10</b>  | −1.92 (−2.91–<br>−0.92) | -                       | -                      | -                | -                 | -                 |
| <b>Mar 23–May 1</b>   | −0.77 (−1.53–<br>−0.02) | −1.15 (−2.24–<br>−0.06) | -                      | -                | -                 | -                 |
| <b>Mar 23–May 20</b>  | −0.33 (−1–0.34)         | −1.59 (−2.62–<br>−0.56) | −0.44 (−1.24–<br>0.36) | -                | -                 | -                 |
| <b>May 20–June 30</b> | −1.27 (−2.01–<br>−0.52) | −0.65 (−1.73–<br>0.43)  | 0.5 (−0.37–1.36)       | 0.94 (1.73–0.15) | -                 | -                 |
| <b>Mar 23–June 30</b> | −0.77 (−1.36–<br>−0.19) | −1.15 (−2.13–<br>−0.17) | 0 (−0.73–0.73)         | 0.44 (−0.2–1.08) | −0.44 (−1.08–0.2) | -                 |
| <b>July 1–Dec 11</b>  | −1.16 (−1.69–<br>−0.63) | −0.76 (−1.7–0.19)       | 1.61 (0.92–2.29)       | 0.83 (0.24–1.43) | −0.1 (−0.78–0.57) | 0.39 (−0.11–0.89) |

**Table S34.** Difference in interannual PM<sub>2.5</sub> concentrations (µg/m<sup>3</sup>) 2016–2019 compared to 2020, as well as 95% confidence interval of each indicated time period at Taft.

|                | 2019                | 2018                | 2017             | 2016              |
|----------------|---------------------|---------------------|------------------|-------------------|
| Jan 1–Mar 22   | −1.89 (−2.59–−1.2)  | −1.45 (−2.15–−0.76) | 1.19 (0.49–1.88) | 0.49 (−0.21–1.18) |
| Mar 23–Apr 10  | 0.12 (−1.32–1.55)   | 2.54 (1.1–3.97)     | 3.75 (2.32–5.19) | 4.24 (2.8–5.68)   |
| Mar 23–May 1   | 0.01 (−0.98–1)      | 1.06 (0.07–2.05)    | 1.88 (0.89–2.87) | 1.42 (0.44–2.41)  |
| Mar 23–May 20  | −0.86 (−1.67–−0.04) | −1.37 (−2.18–−0.55) | 1.03 (0.22–1.85) | 1.33 (0.52–2.15)  |
| May 20–June 30 | −0.4 (−1.36–0.57)   | −1.32 (−2.29–−0.36) | 1.15 (0.18–2.11) | 0.51 (−0.45–1.48) |
| Mar 23–June 30 | −0.66 (−1.28–−0.03) | −1.26 (−1.89–−0.64) | 1.16 (0.53–1.78) | 1.06 (0.44–1.69)  |
| July 1–Dec 11  | −1.21 (−1.7–−0.73)  | −1.58 (−2.07–−1.09) | 2.92 (2.43–3.41) | 0.35 (−0.13–0.84) |

**Table S35.** Difference in intra-annual 2020 BC concentrations ( $\mu\text{g}/\text{m}^3$ ), as well as 95% confidence interval of each indicated time period at Near Road.

|                | Jan 1–Mar 22       | Mar 23–Apr 10       | Mar 23–May 1       | Mar 23–May 20    | May 20–June 30     | Mar 23–June 30  |
|----------------|--------------------|---------------------|--------------------|------------------|--------------------|-----------------|
| Mar 23–Apr 10  | −0.13 (−0.32–0.06) | -                   | -                  | -                | -                  | -               |
| Mar 23–May 1   | 0.06 (−0.08–0.21)  | −0.19 (−0.4–0.02)   | -                  | -                | -                  | -               |
| Mar 23–May 20  | 0.08 (−0.05–0.21)  | −0.21 (−0.41–−0.01) | −0.01 (−0.17–0.14) | -                | -                  | -               |
| May 20–June 30 | −0.08 (−0.22–0.07) | −0.05 (−0.26–0.15)  | 0.14 (−0.03–0.31)  | 0.15 (0.31–0)    | -                  | -               |
| Mar 23–June 30 | 0.01 (−0.1–0.12)   | −0.14 (−0.33–0.05)  | 0.05 (−0.09–0.19)  | 0.07 (0.19–0.19) | −0.07 (−0.19–0.06) | -               |
| July 1–Dec 11  | −0.6 (−0.7–−0.49)  | 0.47 (0.28–0.65)    | 0.06 (−0.08–0.21)  | 0.67 (0.56–0.79) | 0.52 (0.39–0.65)   | 0.61 (0.51–0.7) |

**Table S36.** Difference in interannual BC concentrations ( $\mu\text{g}/\text{m}^3$ ) 2016–2019 compared to 2020, as well as 95% confidence interval of each indicated time period at Near Road.

|                | 2019                | 2018                | 2017                | 2016                |
|----------------|---------------------|---------------------|---------------------|---------------------|
| Jan 1–Mar 22   | −0.03 (−0.2–0.13)   | −0.01 (−0.17–0.15)  | −0.27 (−0.44–−0.11) | −0.59 (−0.76–−0.43) |
| Mar 23–Apr 10  | −0.49 (−0.83–−0.15) | 0.06 (−0.28–0.4)    | −0.14 (−0.48–0.2)   | 0.02 (−0.32–0.35)   |
| Mar 23–May 1   | −0.41 (−0.65–−0.18) | −0.17 (−0.4–0.06)   | −0.48 (−0.71–−0.24) | −0.89 (−1.13–−0.66) |
| Mar 23–May 20  | 0.03 (−0.17–0.22)   | −0.28 (−0.48–−0.09) | −0.56 (−0.76–−0.37) | −1.08 (−1.27–−0.89) |
| May 20–June 30 | 0.2 (−0.03–0.43)    | −0.11 (−0.33–0.12)  | −0.34 (−0.57–−0.12) | −1.75 (−1.98–−1.52) |
| Mar 23–June 30 | 0.09 (−0.05–0.24)   | −0.2 (−0.35–−0.06)  | −0.47 (−0.62–−0.33) | −1.34 (−1.49–−1.2)  |
| July 1–Dec 11  | 0.17 (0.05–0.28)    | 0.17 (0.05–0.28)    | −0.22 (−0.33–−0.1)  | −1.31 (−1.43–−1.2)  |

**Table S37.** Difference in intra-annual 2020 BC concentrations ( $\mu\text{g}/\text{m}^3$ ), as well as 95% confidence interval of each indicated time period at Taft.

|                | Jan 1–Mar 22        | Mar 23–Apr 10       | Mar 23–May 1      | Mar 23–May 20    | May 20–June 30      | Mar 23–June 30  |
|----------------|---------------------|---------------------|-------------------|------------------|---------------------|-----------------|
| Mar 23–Apr 10  | −0.04 (−0.12–0.04)  | -                   | -                 | -                | -                   | -               |
| Mar 23–May 1   | 0.09 (0.03–0.15)    | −0.13 (−0.22–−0.04) | -                 | -                | -                   | -               |
| Mar 23–May 20  | 0.04 (−0.01–0.1)    | −0.08 (−0.16–0.01)  | 0.05 (−0.02–0.12) | -                | -                   | -               |
| May 20–June 30 | −0.15 (−0.21–−0.09) | 0.11 (0.02–0.2)     | 0.24 (0.17–0.31)  | 0.19 (0.12–0.12) | -                   | -               |
| Mar 23–June 30 | −0.04 (−0.09–0.01)  | 0 (−0.08–0.08)      | 0.13 (0.07–0.19)  | 0.08 (0.03–0.13) | −0.08 (−0.13–−0.03) | -               |
| July 1–Dec 11  | −0.24 (−0.28–−0.19) | 0.2 (0.12–0.28)     | 0.33 (0.27–0.38)  | 0.28 (0.23–0.33) | 0.09 (0.03–0.14)    | 0.2 (0.15–0.24) |

**Table S38.** Difference in interannual BC concentrations ( $\mu\text{g}/\text{m}^3$ ) 2019 compared to 2020, as well as 95% confidence interval of each indicated time period at Taft.

|                | 2019               |
|----------------|--------------------|
| Jan 1–Mar 22   | 0.03 (−0.02–0.08)  |
| Mar 23–Apr 10  | −0.08 (−0.18–0.03) |
| Mar 23–May 1   | −0.12 (−0.19–0.04) |
| Mar 23–May 20  | −0.08 (−0.14–0.02) |
| May 20–June 30 | 0.09 (0.02–0.16)   |
| Mar 23–June 30 | −0.01 (−0.06–0.03) |
| July 1–Dec 11  | 0.09 (0.05–0.12)   |

**Table S39.** Difference in intra-annual 2020 CO concentrations (ppm), as well as 95% confidence interval of each indicated time period at Near Road.

|                | Jan 1–Mar 22       | Mar 23–Apr 10      | Mar 23–May 1      | Mar 23–May 20     | May 20–June 30     | Mar 23–June 30   |
|----------------|--------------------|--------------------|-------------------|-------------------|--------------------|------------------|
| Mar 23–Apr 10  | 0 (−0.04–0.04)     | -                  | -                 | -                 | -                  | -                |
| Mar 23–May 1   | 0.03 (0–0.05)      | −0.03 (−0.07–0.01) | -                 | -                 | -                  | -                |
| Mar 23–May 20  | 0.02 (0–0.05)      | −0.02 (−0.06–0.01) | 0 (−0.02–0.03)    | -                 | -                  | -                |
| May 20–June 30 | 0 (−0.02–0.03)     | 0 (−0.04–0.04)     | 0.02 (−0.01–0.06) | 0.02 (−0.01–0.05) | -                  | -                |
| Mar 23–June 30 | 0.01 (−0.01–0.03)  | −0.01 (−0.05–0.02) | 0.01 (−0.01–0.04) | 0.01 (−0.01–0.03) | −0.01 (−0.03–0.01) | -                |
| July 1–Dec 11  | −0.11 (−0.13–−0.1) | 0.11 (0.08–0.15)   | 0.14 (0.12–0.17)  | 0.14 (0.12–0.16)  | 0.12 (0.09–0.14)   | 0.13 (0.11–0.15) |

**Table S40.** Difference in interannual CO concentrations (ppm) 2016–2019 compared to 2020, as well as 95% confidence interval of each indicated time period at Near Road.

|                | 2019                | 2018               | 2017               | 2016               |
|----------------|---------------------|--------------------|--------------------|--------------------|
| Jan 1–Mar 22   | −0.09 (−0.11–−0.06) | −0.01 (−0.03–0.02) | −0.03 (−0.05–0)    | −0.02 (−0.04–0.01) |
| Mar 23–Apr 10  | −0.13 (−0.18–−0.08) | −0.04 (−0.09–0.01) | 0 (−0.06–0.05)     | 0.04 (−0.01–0.09)  |
| Mar 23–May 1   | −0.09 (−0.13–−0.06) | −0.07 (−0.1–0.03)  | −0.05 (−0.09–0.02) | −0.07 (−0.1–0.03)  |
| Mar 23–May 20  | −0.04 (−0.07–0.01)  | −0.06 (−0.09–0.03) | −0.05 (−0.08–0.03) | −0.07 (−0.1–0.04)  |
| May 20–June 30 | 0.04 (0–0.07)       | −0.03 (−0.06–0.01) | 0 (−0.04–0.03)     | −0.07 (−0.11–0.04) |
| Mar 23–June 30 | −0.01 (−0.03–0.01)  | −0.04 (−0.07–0.02) | −0.03 (−0.05–0.01) | −0.07 (−0.09–0.05) |
| July 1–Dec 11  | 0.05 (0.03–0.06)    | 0.02 (0.01–0.04)   | 0.04 (0.03–0.06)   | −0.01 (−0.02–0.01) |

**Table S41.** Difference in intra-annual 2020 CO concentrations (ppm), as well as 95% confidence interval of each indicated time period at Taft.

|                | Jan 1–Mar 22        | Mar 23–Apr 10       | Mar 23–May 1        | Mar 23–May 20    | May 20–June 30   | Mar 23–June 30   |
|----------------|---------------------|---------------------|---------------------|------------------|------------------|------------------|
| Mar 23–Apr 10  | −0.01 (−0.03–0.01)  | -                   | -                   | -                | -                | -                |
| Mar 23–May 1   | −0.01 (−0.02–0.01)  | −0.01 (−0.03–0.01)  | -                   | -                | -                | -                |
| Mar 23–May 20  | 0 (−0.02–0.01)      | −0.01 (−0.03–0.01)  | 0 (−0.02–0.01)      | -                | -                | -                |
| May 20–June 30 | 0.01 (0–0.03)       | −0.03 (−0.05–−0.01) | −0.02 (−0.04–−0.01) | −0.02 (−0.03–0)  | -                | -                |
| Mar 23–June 30 | 0 (−0.01–0.01)      | −0.02 (−0.03–0)     | −0.01 (−0.02–0)     | −0.01 (0–−0.02)  | 0.01 (0.02–0)    | -                |
| July 1–Dec 11  | −0.03 (−0.04–−0.02) | 0.02 (0–0.04)       | 0.03 (0.01–0.04)    | 0.03 (0.02–0.04) | 0.05 (0.04–0.06) | 0.04 (0.03–0.05) |

**Table S42.** Difference in interannual CO concentrations (ppb) 2016–2019 compared to 2020, as well as 95% confidence interval of each indicated time period at Taft.

|                | 2019              | 2018                | 2017               | 2016                |
|----------------|-------------------|---------------------|--------------------|---------------------|
| Jan 1–Mar 22   | −0.02 (−0.03–0)   | −0.02 (−0.03–−0.01) | 0.03 (0.01–0.04)   | −0.07 (−0.09–−0.06) |
| Mar 23–Apr 10  | 0.02 (−0.01–0.05) | 0.05 (0.02–0.08)    | 0.08 (0.05–0.11)   | 0 (−0.03–0.03)      |
| Mar 23–May 1   | 0.03 (0.01–0.05)  | 0.02 (0–0.04)       | 0.03 (0.01–0.05)   | −0.04 (−0.06–−0.02) |
| Mar 23–May 20  | 0.03 (0.01–0.04)  | 0 (−0.01–0.02)      | 0.01 (0–0.03)      | −0.04 (−0.06–−0.03) |
| May 20–June 30 | 0.03 (0.01–0.05)  | −0.01 (−0.02–0.01)  | −0.01 (−0.03–0.01) | −0.06 (−0.08–−0.04) |
| Mar 23–June 30 | 0.03 (0.02–0.04)  | 0 (−0.01–0.01)      | 0.01 (−0.01–0.02)  | −0.05 (−0.06–−0.04) |
| July 1–Dec 11  | 0.04 (0.03–0.05)  | 0.06 (0.05–0.07)    | 0.01 (0–0.02)      | 0.04 (0.03–0.05)    |

**Table S43.** Difference in intra-annual 2020 NO<sub>x</sub> concentrations (ppm), as well as 95% confidence interval of each indicated time period at Near Road.

|                | Jan 1–Mar 22      | Mar 23–Apr 10       | Mar 23–May 1        | Mar 23–May 20      | May 20–June 30    | Mar 23–June 30    |
|----------------|-------------------|---------------------|---------------------|--------------------|-------------------|-------------------|
| Mar 23–Apr 10  | 7.64 (1.91–4.13)  | -                   | -                   | -                  | -                 | -                 |
| Mar 23–May 1   | 13.77 (2.05–3.75) | −6.13 (−1.08–1.31)  | -                   | -                  | -                 | -                 |
| Mar 23–May 20  | 15.96 (2.24–3.76) | −8.32 (−1.11–1.16)  | −2.2 (−0.98–0.79)   | -                  | -                 | -                 |
| May 20–June 30 | 28.88 (2.47–4.17) | −21.24 (−1.49–0.9)  | −15.12 (−1.38–0.55) | −12.92 (−1.2–0.56) | -                 | -                 |
| Mar 23–June 30 | 21.07 (2.42–3.76) | −13.43 (−1.15–1.01) | −7.3 (−0.99–0.62)   | −5.1 (−0.8–0.62)   | 5.1 (−0.62–0.8)   | -                 |
| July 1–Dec 11  | −2.37 (0.08–1.3)  | 10.01 (1.29–3.37)   | 16.13 (1.45–2.97)   | 18.33 (1.65–2.96)  | 31.25 (1.86–3.39) | 23.43 (1.85–2.95) |

**Table S44.** Difference in interannual NO<sub>x</sub> concentrations (ppm) 2016–2019 compared to 2020, as well as 95% confidence interval of each indicated time period at Near Road.

|                | 2019                  | 2018                | 2017                   | 2016                   |
|----------------|-----------------------|---------------------|------------------------|------------------------|
| Jan 1–Mar 22   | 1.3 (−3.63–6.23)      | 3.24 (−1.69–8.17)   | 0.47 (−4.46–5.4)       | −10.6 (−15.53–−5.67)   |
| Mar 23–Apr 10  | −13.09 (−23.27–−2.91) | −9.77 (−19.95–0.41) | 0.5 (−9.68–10.68)      | 5.42 (−4.76–15.6)      |
| Mar 23–May 1   | −3.41 (−10.43–3.61)   | 7.07 (0.06–14.09)   | −7.31 (−14.32–−0.29)   | −14.49 (−21.5–−7.47)   |
| Mar 23–May 20  | −5.12 (−10.9–0.66)    | 1.5 (−4.27–7.28)    | −10.33 (−16.1–−4.55)   | −19.75 (−25.52–−13.97) |
| May 20–June 30 | −13.47 (−20.32–−6.62) | 2.22 (−4.63–9.06)   | −22.96 (−29.81–−16.11) | −32.84 (−39.69–−25.99) |
| Mar 23–June 30 | −8.43 (−12.87–−4)     | 2.23 (−2.21–6.67)   | −15.42 (−19.86–−10.98) | −24.64 (−29.07–−20.2)  |
| July 1–Dec 11  | 7.64 (4.17–11.1)      | 3.38 (−0.08–6.85)   | −6.51 (−9.98–−3.05)    | −6.11 (−9.57–−2.64)    |

**Table S45.** Difference in intra-annual 2020 NO<sub>2</sub> concentrations (ppm), as well as 95% confidence interval of each indicated time period at Taft.

|                | Jan 1–Mar 22     | Mar 23–Apr 10     | Mar 23–May 1       | Mar 23–May 20     | May 20–June 30   | Mar 23–June 30 |
|----------------|------------------|-------------------|--------------------|-------------------|------------------|----------------|
| Mar 23–Apr 10  | 2.9 (1.91–4.13)  | -                 | -                  | -                 | -                | -              |
| Mar 23–May 1   | 3 (2.05–3.75)    | 0.02 (−1.08–1.31) | -                  | -                 | -                | -              |
| Mar 23–May 20  | 3.32 (2.24–3.76) | −0.3 (−1.11–1.16) | −0.41 (−0.98–0.79) | -                 | -                | -              |
| May 20–June 30 | 3.09 (2.47–4.17) | −0.07 (−1.49–0.9) | −0.19 (−1.38–0.55) | −0.09 (0.56–−1.2) | -                | -              |
| Mar 23–June 30 | 0.69 (2.42–3.76) | 2.33 (−1.15–1.01) | 2.21 (0.62–−0.99)  | 2.31 (−0.8–0.62)  | 2.63 (−0.62–0.8) | -              |
| July 1–Dec 11  | 0 (0.08–1.3)     | 0 (1.29–3.37)     | 0 (1.45–2.97)      | 0 (1.65–2.96)     | 0 (1.86–3.39)    | 0 (1.85–2.95)  |

**Table S46.** Difference in interannual NO<sub>2</sub> concentrations (ppm) 2016–2019 compared to 2020, as well as 95% confidence interval of each indicated time period at Taft.

|                | 2019               | 2018               | 2017              | 2016               |
|----------------|--------------------|--------------------|-------------------|--------------------|
| Jan 1–Mar 22   | −5.32 (−1.82–0.21) | −3.42 (−1.71–0.01) | 1.99 (1.26–2.96)  | 0 (−1.26–0.34)     |
| Mar 23–Apr 10  | −2.75 (−6.91–3.72) | −2.74 (−5.01–1.82) | 1.64 (0.39–3.58)  | −1.13 (−1.61–1.61) |
| Mar 23–May 1   | −2.56 (−3.85–1.65) | −2.61 (−3.84–1.64) | 1.63 (0.54–2.74)  | −1.42 (−2.24–0.02) |
| Mar 23–May 20  | −1.86 (−3.46–1.65) | −1.91 (−3.52–1.7)  | 1.19 (0.72–2.54)  | −2.79 (−2.33–0.5)  |
| May 20–June 30 | −2.26 (−2.95–0.77) | −2.3 (−3–0.83)     | 1.46 (0.1–2.28)   | −1.95 (−3.88–1.7)  |
| Mar 23–June 30 | −0.92 (−2.96–1.56) | −0.14 (−3.01–1.6)  | −0.03 (0.75–2.16) | −0.59 (−2.65–1.25) |
| July 1–Dec 11  | 0 (−1.47–0.38)     | 0 (−0.7–0.42)      | 0 (−0.59–0.52)    | 0 (−1.13–0.04)     |

**Table S47.** Difference in intra-annual 2020 O<sub>3</sub> concentrations (ppm), as well as 95% confidence interval of each indicated time period at Taft.

|                | Jan 1–Mar 22          | Mar 23–Apr 10     | Mar 23–May 1      | Mar 23–May 20     | May 20–June 30    | Mar 23–June 30 |
|----------------|-----------------------|-------------------|-------------------|-------------------|-------------------|----------------|
| Mar 23–Apr 10  | −12.36 (−12.99–8.13)  | -                 | -                 | -                 | -                 | -              |
| Mar 23–May 1   | −12.04 (−14.2–10.52)  | 1.48 (−0.86–4.46) | -                 | -                 | -                 | -              |
| Mar 23–May 20  | −14.23 (−13.68–10.41) | 3.67 (−1.03–4)    | 1.87 (−2.27–1.64) | -                 | -                 | -              |
| May 20–June 30 | −12.98 (−16.05–12.42) | 2.41 (1.03–6.31)  | 0.61 (−0.24–3.98) | 0.93 (4.11–0.26)  | -                 | -              |
| Mar 23–June 30 | −5.1 (−14.4–11.55)    | −5.46 (0.03–4.8)  | −7.26 (−1.17–2.4) | −6.94 (−0.64–2.5) | −9.13 (−2.5–0.64) | -              |
| July 1–Dec 11  | 0 (−6.4–3.81)         | 0 (−7.77–3.15)    | 0 (−8.94–5.58)    | 0 (−8.39–5.5)     | 0 (−10.78–7.48)   | 0 (−9.08–6.66) |

**Table S48.** Difference in interannual O<sub>3</sub> concentrations (ppm) 2016–2019 compared to 2020, as well as 95% confidence interval of each indicated time period at Taft.

|                | 2019               | 2018               | 2017               | 2016               |
|----------------|--------------------|--------------------|--------------------|--------------------|
| Jan 1–Mar 22   | −3.93 (−6.23–2.77) | −1.26 (−7.73–4.27) | −6.04 (−6.43–2.97) | −1.92 (−5.18–1.72) |
| Mar 23–Apr 10  | −3.18 (−7.5–0.37)  | −3.31 (−4.82–2.31) | −3.87 (−9.61–2.48) | −1.57 (−5.48–1.65) |
| Mar 23–May 1   | −2.12 (−5.64–0.72) | −4.16 (−5.77–0.86) | −4.6 (−6.32–1.41)  | −1.06 (−4.02–0.89) |
| Mar 23–May 20  | 1.91 (−4.14–0.09)  | −2.23 (−6.18–2.14) | −3.08 (−6.62–2.58) | −6.86 (−3.08–0.97) |
| May 20–June 30 | −0.46 (−0.49–4.31) | −3.28 (−4.63–0.17) | −4.08 (−5.48–0.68) | −3.46 (−9.25–4.46) |
| Mar 23–June 30 | −3.2 (−2.01–1.1)   | 1.47 (−4.84–1.73)  | −1.65 (−5.63–2.52) | −0.66 (−5.01–1.9)  |
| July 1–Dec 11  | 0 (−4.41–1.99)     | 0 (0.26–2.68)      | 0 (−2.86–0.43)     | 0 (−1.87–0.56)     |
